# Supplementary material for: Impacts of Enhanced Weathering on biomass production for negative emission technologies and soil hydrology
Source: Copernicus journal article supplement (doi:10.5194/bg-2019-386), 2019-10-09
Supplement: Supplementary file 1 [file bg-2019-386-supplement.zip]

Archive with 2 entries (2 files):
- S1.pdf
- S2.xlsx
