# Supplementary material for: Impacts of Enhanced Weathering on biomass production for negative emission technologies and soil hydrology
Source: Copernicus journal article supplement (doi:10.5194/bg-2019-386), 2019-10-09
Supplement: Supplementary file 1 [file S2.xlsx]

## Sheet: Intro
Impacts of Enhanced Weathering on biomass production for negative emission technologies and soil hydrology Authors: Authors: Wagner de Oliveira Garcia*1, Thorben Amann1, Jens Hartmann1, Kristine Karstens2, Alexander Popp2, Lena R. Boysen3, Pete Smith4, Daniel Goll5,6 Affiliation: 1Institute for Geology, Center for Earth System Research and Sustainability, Universität Hamburg, Germany 2Potsdam Ins…

## Sheet: Wood
Impacts of Enhanced Weathering on biomass production for negative emission technologies and soil hydrology Authors: Authors: Wagner de Oliveira Garcia*1, Thorben Amann1, Jens Hartmann1, Kristine Karstens2, Alexander Popp2, Lena R. Boysen3, Pete Smith4, Daniel Goll5,6 Affiliation: 1Institute for Geology, Center for Earth System Research and Sustainability, Universität Hamburg, Germany 2Potsdam Ins…
Compiled data from Tree Chemistry Database (Version 1.0) of United States Department of Agriculture (Pardo, Linda H.; Robin-Abbott, Molly; Duarte, Natasha; Miller, Eric K. 2005. Tree chemistry database (version 1.0). Gen. Tech. Rep. NE-324. Newtown Square PA: U.S. Department of Agriculture, Forest Service, Northeastern Research Station. 45 p.)
Stem						Bark						Bole						Branch
C	N	P	K	Ca	Mg	C	N	P	K	Ca	Mg	C	N	P	K	Ca	Mg	C	N	P	K	Ca	Mg
[%]
9999	9999	9999	9999	9999	9999	9999	0.48	0.04	0.33	2.29	0.047	9999	0.11	0.01	0.14	0.14	0.021	9999	0.31	0.036	0.29	0.78	0.041
9999	9999	9999	9999	9999	9999	9999	0.33	0.056	0.35	1.52	0.076	9999	0.07	0.01	0.16	0.12	0.02	9999	0.47	0.08	0.38	1.12	0.101
9999	9999	9999	9999	9999	9999	9999	0.12	0.015	0.071	0.397	0.034	9999	0.073	0.014	0.066	0.22	0.028	9999	0.232	0.032	0.062	0.453	0.085
9999	9999	9999	9999	9999	9999	9999	0.354	0.042	0.204	1.158	0.353	9999	0.232	0.033	0.21	0.695	0.088	9999	0.561	0.079	0.148	1.082	0.196
9999	9999	9999	9999	9999	9999	9999	0.359	0.044	0.206	1.174	0.097	9999	0.226	0.032	0.204	0.678	0.086	9999	0.646	0.091	0.17	1.248	0.238
9999	9999	9999	9999	9999	9999	9999	0.298	0.036	0.172	0.976	0.082	9999	0.188	0.027	0.17	0.564	0.072	9999	0.531	0.074	0.139	1.024	0.195
9999	9999	9999	9999	9999	9999	9999	0.318	0.038	0.183	1.04	0.087	9999	0.2	0.029	0.181	0.601	0.076	9999	0.564	0.079	0.149	1.088	0.208
9999	9999	9999	9999	9999	9999	9999	0.305	0.037	0.175	0.997	0.083	9999	0.193	0.028	0.175	0.579	0.074	9999	0.527	0.074	0.139	1.017	0.194
9999	9999	9999	9999	9999	9999	9999	0.12	0.027	0.107	0.073	0.007	9999	0.039	0.013	0.033	0.022	0.006	9999	0.196	0.039	0.161	0.189	0.029
9999	9999	9999	9999	9999	9999	9999	0.228	0.046	0.117	0.307	0.03	9999	0.079	0.024	0.069	0.055	0.016	9999	0.402	0.065	0.175	0.443	0.066
9999	9999	9999	9999	9999	9999	9999	0.186	0.043	0.104	0.195	0.027	9999	0.048	0.006	0.028	0.047	0.009	9999	0.406	0.07	0.183	0.591	0.064
9999	9999	9999	9999	9999	9999	9999	0.163	0.028	0.075	0.448	0.036	9999	0.099	0.025	0.054	0.094	0.023	9999	0.435	0.073	0.196	0.825	0.074
9999	9999	9999	9999	9999	9999	9999	0.398	0.046	0.145	0.829	0.052	9999	0.104	0.014	0.058	0.13	0.023	9999	0.616	0.095	0.278	0.982	0.075
9999	9999	9999	9999	9999	9999	9999	0.399	0.043	0.143	0.604	0.059	9999	0.092	0.019	0.056	0.146	0.024	9999	0.499	0.087	0.213	0.749	0.06
9999	9999	9999	9999	9999	9999	9999	0.37	0.06	0.19	0.5	0.05	9999	0.13	0.04	0.08	0.1	0.03	9999	0.47	0.07	0.19	0.48	0.06
9999	9999	9999	9999	9999	9999	9999	0.44	0.14	0.41	0.96	0.08	9999	0.1	0.03	0.09	0.18	0.03	9999	0.4	0.16	0.39	0.68	0.08
9999	9999	9999	9999	9999	9999	9999	0.368	0.054	0.105	0.651	0.066	9999	0.093	0.012	0.033	0.089	0.021	9999	0.312	0.048	0.129	0.5	0.065
9999	9999	9999	9999	9999	9999	9999	0.241	0.02	0.165	0.375	0.035	9999	0.078	0.006	0.062	0.069	0.012	9999	0.266	0.019	0.17	0.19	0.033
9999	9999	9999	9999	9999	9999	9999	0.241	0.02	0.165	0.375	0.035	9999	0.078	0.006	0.062	0.069	0.012	9999	0.266	0.019	0.17	0.19	0.033
9999	9999	9999	9999	9999	9999	9999	0.241	0.02	0.165	0.375	0.035	9999	0.078	0.006	0.062	0.069	0.012	9999	0.266	0.019	0.17	0.19	0.033
9999	9999	9999	9999	9999	9999	9999	9999	9999	9999	9999	9999	9999	9999	9999	9999	9999	9999	9999	9999	9999	9999	9999	9999
9999	9999	9999	9999	9999	9999	9999	9999	9999	9999	9999	9999	9999	9999	9999	9999	9999	9999	9999	9999	9999	9999	9999	9999
9999	9999	9999	9999	9999	9999	9999	0.654	0.029	0.325	1.536	0.115	9999	0.142	0.0052	0.0906	0.0281	0.0106	9999	0.546	0.031	0.196	0.26	0.047
9999	9999	9999	9999	9999	9999	9999	0.692	0.037	0.337	1.572	0.103	9999	0.1385	0.0056	0.0652	0.025	0.0077	9999	0.573	0.04	0.193	0.184	0.039
9999	9999	9999	9999	9999	9999	9999	0.626	0.036	0.352	1.148	0.098	9999	0.1226	0.0049	0.0811	0.0231	0.0082	9999	0.559	0.047	0.225	0.196	0.059
9999	0.15	0.03	0.137	0.01	0	9999	9999	9999	9999	9999	9999	9999	9999	9999	9999	9999	9999	9999	0.543	0.093	0.373	0.237	0.06
9999	0.173	0.043	0.16	0	0	9999	9999	9999	9999	9999	9999	9999	9999	9999	9999	9999	9999	9999	0.44	0.083	0.247	0.217	0.04
9999	0.19	0.05	0.203	0.03	0.007	9999	9999	9999	9999	9999	9999	9999	9999	9999	9999	9999	9999	9999	0.35	0.08	0.277	0.273	0.033
9999	0.203	0.053	0.273	0.043	0.013	9999	9999	9999	9999	9999	9999	9999	9999	9999	9999	9999	9999	9999	0.43	0.083	0.287	0.623	0.06
9999	9999	9999	9999	9999	9999	9999	0.417	0.059	0.312	1.576	0.074	9999	0.071	0.008	0.094	0.144	0.016	9999	0.494	0.068	0.253	1.295	0.075
9999	9999	9999	9999	9999	9999	9999	0.393	0.076	0.286	1.482	0.067	9999	0.067	0.006	0.036	0.097	0.007	9999	0.366	0.05	0.232	0.626	0.039
9999	9999	9999	9999	9999	9999	9999	0.314	0.048	0.121	0.521	0.062	9999	0.077	0.006	0.046	0.078	0.018	9999	0.24	0.031	0.125	0.255	0.035
9999	9999	9999	9999	9999	9999	9999	0.268	0.038	0.094	0.449	0.046	9999	0.08	0.004	0.038	0.068	0.016	9999	0.325	0.033	0.108	0.217	0.042
9999	9999	9999	9999	9999	9999	9999	0.382	0.057	0.239	1.833	0.085	9999	0.078	0.007	0.069	0.154	0.022	9999	0.389	0.075	0.244	0.995	0.077
9999	9999	9999	9999	9999	9999	9999	0.367	0.061	0.208	1.517	0.072	9999	0.061	0.005	0.029	0.125	0.007	9999	0.415	0.074	0.305	0.677	0.071
9999	9999	9999	9999	9999	9999	9999	0.323	0.043	0.154	0.538	0.072	9999	0.083	0.006	0.035	0.092	0.019	9999	0.226	0.04	0.183	0.312	0.053
9999	9999	9999	9999	9999	9999	9999	0.296	0.03	0.122	0.435	0.051	9999	0.059	0.005	0.04	0.076	0.016	9999	0.356	0.047	0.207	0.218	0.056
9999	9999	9999	9999	9999	9999	9999	0.51	0.068	0.253	0.428	0.074	9999	0.07	0.006	0.19	0.065	0.022	9999	9999	9999	9999	9999	9999
9999	9999	9999	9999	9999	9999	9999	0.66	0.036	0.091	0.447	0.056	9999	0.115	0.009	0.04	0.084	0.02	9999	9999	9999	9999	9999	9999
9999	9999	9999	9999	9999	9999	9999	9999	9999	9999	9999	9999	9999	9999	9999	9999	9999	9999	9999	9999	9999	9999	9999	9999
9999	9999	9999	9999	9999	9999	9999	9999	9999	9999	9999	9999	9999	9999	9999	9999	9999	9999	9999	9999	9999	9999	9999	9999
9999	9999	9999	9999	9999	9999	9999	9999	9999	9999	9999	9999	9999	9999	9999	9999	9999	9999	9999	9999	9999	9999	9999	9999
9999	9999	9999	9999	9999	9999	9999	9999	9999	9999	9999	9999	9999	9999	9999	9999	9999	9999	9999	9999	9999	9999	9999	9999
9999	9999	9999	9999	9999	9999	9999	9999	9999	9999	9999	9999	9999	9999	9999	9999	9999	9999	9999	9999	9999	9999	9999	9999
9999	9999	9999	9999	9999	9999	9999	9999	9999	9999	9999	9999	9999	9999	9999	9999	9999	9999	9999	9999	9999	9999	9999	9999
9999	9999	9999	9999	9999	9999	9999	9999	9999	9999	9999	9999	9999	9999	9999	9999	9999	9999	9999	9999	9999	9999	9999	9999
9999	9999	9999	9999	9999	9999	9999	9999	9999	9999	9999	9999	9999	9999	9999	9999	9999	9999	9999	9999	9999	9999	9999	9999
9999	9999	9999	9999	9999	9999	9999	9999	9999	9999	9999	9999	9999	9999	9999	9999	9999	9999	9999	9999	9999	9999	9999	9999
9999	9999	9999	9999	9999	9999	9999	9999	9999	9999	9999	9999	9999	9999	9999	9999	9999	9999	9999	9999	9999	9999	9999	9999
9999	9999	9999	9999	9999	9999	9999	9999	9999	9999	9999	9999	9999	9999	9999	9999	9999	9999	9999	9999	9999	9999	9999	9999
9999	9999	9999	9999	9999	9999	9999	9999	9999	9999	9999	9999	9999	9999	9999	9999	9999	9999	9999	9999	9999	9999	9999	9999
9999	9999	9999	9999	9999	9999	9999	9999	9999	9999	9999	9999	9999	9999	9999	9999	9999	9999	9999	9999	9999	9999	9999	9999
9999	9999	9999	9999	9999	9999	9999	9999	9999	9999	9999	9999	9999	9999	9999	9999	9999	9999	9999	9999	9999	9999	9999	9999
9999	9999	9999	9999	9999	9999	9999	9999	9999	9999	9999	9999	9999	9999	9999	9999	9999	9999	9999	9999	9999	9999	9999	9999
9999	9999	9999	9999	9999	9999	9999	9999	9999	9999	9999	9999	9999	9999	9999	9999	9999	9999	9999	9999	9999	9999	9999	9999
9999	9999	9999	9999	9999	9999	9999	9999	9999	9999	9999	9999	9999	9999	9999	9999	9999	9999	9999	9999	9999	9999	9999	9999
9999	9999	9999	9999	9999	9999	9999	9999	9999	9999	9999	9999	9999	9999	9999	9999	9999	9999	9999	9999	9999	9999	9999	9999
9999	9999	9999	9999	9999	9999	9999	9999	9999	9999	9999	9999	9999	9999	9999	9999	9999	9999	9999	9999	9999	9999	9999	9999
9999	9999	9999	9999	9999	9999	9999	9999	9999	9999	9999	9999	9999	9999	9999	9999	9999	9999	9999	9999	9999	9999	9999	9999
9999	9999	9999	9999	9999	9999	9999	9999	9999	9999	9999	9999	9999	9999	9999	9999	9999	9999	9999	9999	9999	9999	9999	9999
9999	9999	9999	9999	9999	9999	9999	9999	9999	9999	9999	9999	9999	9999	9999	9999	9999	9999	9999	9999	9999	9999	9999	9999
9999	9999	9999	9999	9999	9999	9999	9999	9999	9999	9999	9999	9999	9999	9999	9999	9999	9999	9999	9999	9999	9999	9999	9999
9999	9999	9999	9999	9999	9999	9999	9999	9999	9999	9999	9999	9999	9999	9999	9999	9999	9999	9999	9999	9999	9999	9999	9999
9999	9999	9999	9999	9999	9999	9999	9999	9999	9999	9999	9999	9999	9999	9999	9999	9999	9999	9999	9999	9999	9999	9999	9999
9999	9999	9999	9999	9999	9999	9999	9999	9999	9999	9999	9999	9999	9999	9999	9999	9999	9999	9999	9999	9999	9999	9999	9999
9999	9999	9999	9999	9999	9999	9999	9999	9999	9999	9999	9999	9999	9999	9999	9999	9999	9999	9999	9999	9999	9999	9999	9999
9999	9999	9999	9999	9999	9999	9999	9999	9999	9999	9999	9999	9999	9999	9999	9999	9999	9999	9999	9999	9999	9999	9999	9999
9999	9999	9999	9999	9999	9999	9999	9999	9999	9999	9999	9999	9999	9999	9999	9999	9999	9999	9999	9999	9999	9999	9999	9999
9999	9999	9999	9999	9999	9999	9999	9999	9999	9999	9999	9999	9999	9999	9999	9999	9999	9999	9999	9999	9999	9999	9999	9999
9999	9999	9999	9999	9999	9999	9999	9999	9999	9999	9999	9999	9999	9999	9999	9999	9999	9999	9999	9999	9999	9999	9999	9999
9999	9999	9999	9999	9999	9999	9999	9999	9999	9999	9999	9999	9999	9999	9999	9999	9999	9999	9999	9999	9999	9999	9999	9999
9999	9999	9999	9999	9999	9999	9999	9999	9999	9999	9999	9999	9999	9999	9999	9999	9999	9999	9999	9999	9999	9999	9999	9999
9999	9999	9999	9999	9999	9999	9999	9999	9999	9999	9999	9999	9999	9999	9999	9999	9999	9999	9999	9999	9999	9999	9999	9999
9999	9999	9999	9999	9999	9999	9999	0.55	0.03	0.29	1.41	0.06	9999	0.098	0.01	0.07	0.1	0.02	9999	0.37	0.07	0.17	0.43	0.03
9999	9999	9999	9999	9999	9999	9999	0.55	0.03	0.29	1.41	0.06	9999	0.098	0.01	0.07	0.1	0.02	9999	0.37	0.07	0.17	0.43	0.03
9999	9999	9999	9999	9999	9999	9999	0.55	0.03	0.29	1.41	0.06	9999	0.098	0.01	0.08	0.11	0.02	9999	0.37	0.07	0.17	0.43	0.03
9999	9999	9999	9999	9999	9999	9999	0.6	0.03	0.13	0.96	0.04	9999	0.092	0.01	0.03	0.06	0.01	9999	0.44	0.03	0.1	0.42	0.03
9999	9999	9999	9999	9999	9999	9999	0.6	0.03	0.13	0.96	0.04	9999	0.093	0.01	0.04	0.06	0.01	9999	0.44	0.03	0.1	0.42	0.03
9999	9999	9999	9999	9999	9999	9999	0.6	0.03	0.13	0.96	0.04	9999	0.093	0.01	0.04	0.06	0.01	9999	0.44	0.03	0.1	0.42	0.03
9999	9999	9999	9999	9999	9999	9999	0.75	0.04	0.22	2.53	0.05	9999	0.11	0.01	0.07	0.06	0.02	9999	0.3	0.03	0.12	0.47	0.03
9999	9999	9999	9999	9999	9999	9999	0.75	0.04	0.22	2.53	0.05	9999	0.11	0.01	0.07	0.06	0.02	9999	0.3	0.03	0.12	0.47	0.03
9999	9999	9999	9999	9999	9999	9999	0.75	0.04	0.22	2.53	0.05	9999	0.11	0.01	0.07	0.06	0.02	9999	0.3	0.03	0.12	0.47	0.03
9999	9999	9999	9999	9999	9999	9999	0.76	0.09	0.16	1.36	0.06	9999	0.069	0.008	0.04	0.09	0.01	9999	0.48	0.1	0.18	0.46	0.05
9999	9999	9999	9999	9999	9999	9999	0.76	0.09	0.16	1.36	0.06	9999	0.069	0.008	0.04	0.09	0.01	9999	0.48	0.1	0.18	0.46	0.05
9999	9999	9999	9999	9999	9999	9999	0.76	0.09	0.16	1.36	0.06	9999	0.069	0.008	0.04	0.09	0.01	9999	0.48	0.1	0.18	0.46	0.05
9999	9999	9999	9999	9999	9999	9999	0.35	0.04	0.18	0.68	0.04	9999	0.055	0.001	0.02	0.06	0.01	9999	9999	0.1	0.34	0.25	0.05
9999	9999	9999	9999	9999	9999	9999	0.35	0.04	0.18	0.68	0.04	9999	0.055	0.001	0.02	0.06	0.01	9999	9999	0.1	0.34	0.25	0.05
9999	9999	9999	9999	9999	9999	9999	0.35	0.04	0.18	0.68	0.04	9999	0.055	0.001	0.02	0.06	0.01	9999	9999	0.1	0.34	0.25	0.05
9999	9999	9999	9999	9999	9999	9999	0.76	0.1	0.48	1.11	0.11	9999	0.24	0.04	0.26	0.31	0.03	9999	0.3	0.03	0.17	0.41	0.04
9999	9999	9999	9999	9999	9999	9999	0.76	0.1	0.48	1.11	0.11	9999	0.24	0.04	0.26	0.31	0.03	9999	0.3	0.03	0.17	0.41	0.04
9999	9999	9999	9999	9999	9999	9999	0.76	0.1	0.48	1.11	0.11	9999	0.24	0.04	0.26	0.31	0.03	9999	0.3	0.03	0.17	0.41	0.04
9999	9999	9999	9999	9999	9999	9999	0.353	0.038	0.184	0.428	0.065	9999	0.0779	0.01	0.034	0.0678	0.017	9999	9999	9999	9999	9999	9999
9999	9999	9999	9999	9999	9999	9999	0.242	0.027	0.146	0.526	0.06	9999	0.0605	0.01	0.0129	0.096	0.0158	9999	9999	9999	9999	9999	9999
9999	9999	9999	9999	9999	9999	9999	0.31	0.043	0.277	1.155	0.081	9999	0.0618	0.01	0.0211	0.1153	0.0115	9999	9999	9999	9999	9999	9999
9999	9999	9999	9999	9999	9999	9999	0.372	0.05	0.307	0.921	0.07	9999	0.0597	0.01	0.1202	0.1552	0.0272	9999	9999	9999	9999	9999	9999
9999	9999	9999	9999	9999	9999	9999	0.334	0.05	0.28	1.114	0.092	9999	0.0711	0.0099	0.0586	0.1391	0.0242	9999	9999	9999	9999	9999	9999
9999	9999	9999	9999	9999	9999	9999	0.383	0.03	0.148	0.97	0.049	9999	0.0969	0.0099	0.0354	0.0953	0.0201	9999	9999	9999	9999	9999	9999
9999	9999	9999	9999	9999	9999	9999	0.463	0.043	0.215	1.265	0.048	9999	0.084	0.01	0.0623	0.1371	0.0211	9999	9999	9999	9999	9999	9999
9999	9999	9999	9999	9999	9999	9999	0.293	0.0399	0.129	0.483	0.0581	9999	0.0856	0.008	0.0445	0.0825	0.0192	9999	0.332	0.0476	0.191	0.328	0.0615
9999	9999	9999	9999	9999	9999	9999	0.301	0.0287	0.11	0.439	0.0424	9999	0.0786	0.0058	0.043	0.071	0.0162	9999	0.436	0.0534	0.228	0.206	0.0538
9999	9999	9999	9999	9999	9999	50.68	0.562	0.056	0.274	0.822	0.108	50	0.107	0.009	0.054	0.07	0.014	47.63	0.58	0.074	0.189	0.389	0.068
9999	0.19	0.01	0.04	0.73	9999	9999	9999	9999	9999	9999	9999	9999	9999	9999	9999	9999	9999	9999	0.25	0.02	0.09	0.55	9999
9999	0.17	0.01	0.07	0.87	9999	9999	9999	9999	9999	9999	9999	9999	9999	9999	9999	9999	9999	9999	0.23	0.01	0.07	0.74	9999
9999	0.19	0.01	0.11	1.19	9999	9999	9999	9999	9999	9999	9999	9999	9999	9999	9999	9999	9999	9999	0.21	0.03	0.34	0.83	9999
9999	0.18	0.01	0.03	0.27	9999	9999	9999	9999	9999	9999	9999	9999	9999	9999	9999	9999	9999	9999	0.2	0.02	0.04	0.2	9999
9999	0.16	0.02	0.06	0.43	9999	9999	9999	9999	9999	9999	9999	9999	9999	9999	9999	9999	9999	9999	0.15	0.02	0.08	0.21	9999
9999	0.17	0.01	0.14	1.01	9999	9999	9999	9999	9999	9999	9999	9999	9999	9999	9999	9999	9999	9999	0.24	0.02	0.08	1	9999
9999	9999	9999	9999	9999	9999	9999	0.547	0.016	0.4643	9.0213	0.1139	9999	0.124	0.0055	0.4673	0.8995	0.0636	9999	9999	9999	9999	9999	9999
9999	9999	9999	9999	9999	9999	9999	0.16	0.042	0.142	0.521	0.053	9999	0.059	0.005	0.02	0.082	0.007	9999	0.112	0.018	0.044	0.273	0.026
9999	9999	9999	9999	9999	9999	9999	0.27	0.066	0.255	0.541	0.059	9999	0.078	9999	0.077	0.083	0.027	9999	0.141	9999	0.112	0.305	0.033
9999	9999	9999	9999	9999	9999	9999	0.28	0.069	0.141	0.889	0.048	9999	0.064	0.012	0.04	0.075	0.011	9999	0.135	9999	0.065	0.354	0.025
9999	9999	9999	9999	9999	9999	9999	0.2	0.042	0.144	0.414	0.058	9999	0.076	9999	0.029	0.021	0.007	9999	0.147	0.02	0.08	0.257	0.044
9999	9999	9999	9999	9999	9999	9999	0.54	0.037	0.098	0.96	0.044	9999	0.094	0.015	0.027	0.074	0.018	9999	0.266	0.022	0.068	0.344	0.029
9999	9999	9999	9999	9999	9999	9999	0.47	0.062	0.199	1.27	0.045	9999	0.083	0.003	0.069	0.082	0.012	9999	0.28	0.028	0.126	0.348	0.027
9999	9999	9999	9999	9999	9999	9999	0.34	0.034	0.271	1.27	0.079	9999	0.106	0.01	0.123	0.113	0.027	9999	0.314	0.022	0.134	0.529	0.053
9999	9999	9999	9999	9999	9999	50	0.889	0.052	0.211	1	0.061	48.11	0.099	0.008	0.086	0.052	0.024	50.51	0.667	0.056	0.23	0.385	0.041
9999	9999	9999	9999	9999	9999	50	0.455	0.062	0.314	0.764	0.097	49.17	0.071	0.006	0.043	0.048	0.007	52	0.92	0.121	0.448	0.344	0.073
9999	9999	9999	9999	9999	9999	9999	0.4934	0.0497	0.2872	1.7347	0.0861	9999	0.1204	0.0123	0.1029	0.1035	0.0262	9999	0.535	0.0617	0.2925	1.685	0.1092
9999	9999	9999	9999	9999	9999	9999	0.6011	0.06	0.2894	1.619	0.1386	9999	0.1487	0.0242	0.1032	0.1114	0.0288	9999	0.57	0.07	0.3142	1.5267	0.1425
9999	9999	9999	9999	9999	9999	9999	0.4502	0.0619	0.3132	1.49	0.1453	9999	0.1094	0.012	0.0759	0.1734	0.0379	9999	0.42	0.0692	0.3217	1.0092	0.0933
9999	9999	9999	9999	9999	9999	9999	0.347	0.058	0.222	0.695	0.06	9999	0.055	0.01	0.067	0.058	0.018	9999	0.377	0.083	0.238	0.41	0.06
9999	9999	9999	9999	9999	9999	9999	0.347	0.052	0.197	1.18	0.078	9999	0.082	0.01	0.027	0.073	0.012	9999	0.327	0.046	0.185	0.44	0.052
9999	9999	9999	9999	9999	9999	9999	0.24	0.037	0.157	1.07	0.067	9999	0.114	0.01	0.031	0.113	0.013	9999	0.313	0.044	0.163	0.399	0.053
9999	9999	9999	9999	9999	9999	9999	0.304	0.036	0.169	1.05	0.054	9999	0.096	0.009	0.03	0.083	0.011	9999	0.371	0.046	0.139	0.48	0.046
9999	9999	9999	9999	9999	9999	9999	0.451	0.037	0.15	1.45	0.044	9999	0.104	0.011	0.06	0.084	0.017	9999	0.26	0.037	0.186	0.416	0.033
9999	9999	9999	9999	9999	9999	9999	0.544	0.036	0.186	1.55	0.077	9999	0.119	0.011	0.059	0.111	0.026	9999	0.396	0.043	0.194	0.413	0.046
9999	9999	9999	9999	9999	9999	9999	0.59	0.03	0.122	1.09	0.05	9999	0.145	0.01	0.04	0.092	0.023	9999	0.52	0.08	0.152	0.392	0.055
9999	9999	9999	9999	9999	9999	9999	0.398	0.033	0.082	0.83	0.042	9999	0.14	0.012	0.043	0.068	0.02	9999	0.517	0.067	0.087	0.376	0.037
9999	9999	9999	9999	9999	9999	9999	0.327	0.032	0.213	0.883	0.063	9999	0.134	0.016	0.099	0.073	0.029	9999	0.461	0.064	0.306	0.626	0.07
9999	9999	9999	9999	9999	9999	9999	0.323	0.048	0.272	0.948	0.108	9999	0.118	0.015	0.138	0.11	0.037	9999	0.483	0.085	0.367	0.598	0.112
9999	0.079	0.011	0.067	0.104	0.026	9999	9999	9999	9999	9999	9999	9999	9999	9999	9999	9999	9999	9999	0.47	0.067	0.3	0.3	0.033
9999	0.089	0.011	0.073	0.108	0.022	9999	9999	9999	9999	9999	9999	9999	9999	9999	9999	9999	9999	9999	0.39	0.055	0.29	0.22	0.036
9999	0.08	0.011	0.066	0.098	0.02	9999	9999	9999	9999	9999	9999	9999	9999	9999	9999	9999	9999	9999	0.46	0.073	0.32	0.26	0.057
9999	0.076	0.009	0.069	0.089	0.019	9999	9999	9999	9999	9999	9999	9999	9999	9999	9999	9999	9999	9999	0.36	0.046	0.28	0.19	0.059
9999	0.085	0.011	0.075	0.098	0.019	9999	9999	9999	9999	9999	9999	9999	9999	9999	9999	9999	9999	9999	0.31	0.038	0.23	0.2	0.049
9999	9999	9999	9999	9999	9999	9999	0.22	0.12	0.17	0.97	9999	9999	0.059	0.007	0.027	0.066	9999	9999	0.3	0.056	0.13	0.4	0.044
9999	9999	9999	9999	9999	9999	9999	0.52	0.06	0.42	2.65	0.12	9999	0.096	0.02	0.13	0.12	0.026	9999	0.44	0.056	0.33	0.83	0.065
9999	9999	9999	9999	9999	9999	9999	0.49	0.08	0.62	2.09	0.13	9999	0.102	0.022	0.12	0.11	0.022	9999	0.36	0.073	0.36	0.83	0.083
9999	9999	9999	9999	9999	9999	9999	0.64	0.07	0.5	1.86	0.14	9999	0.124	0.017	0.12	0.11	0.025	9999	0.43	0.054	0.35	0.65	0.069
9999	9999	9999	9999	9999	9999	9999	0.62	0.05	0.45	2	0.16	9999	0.097	0.012	0.12	0.11	0.027	9999	0.48	0.053	0.33	0.87	0.085
9999	9999	9999	9999	9999	9999	9999	0.66	0.06	0.43	1.76	0.14	9999	0.094	0.014	0.13	0.12	0.02	9999	0.47	0.061	0.31	0.55	0.068
9999	9999	9999	9999	9999	9999	9999	0.47	0.08	0.54	2.2	0.13	9999	0.079	0.031	0.16	0.13	0.029	9999	0.44	0.094	0.58	1.13	0.094
9999	9999	9999	9999	9999	9999	9999	0.78	0.07	0.39	2.04	0.15	9999	0.107	0.012	0.13	0.13	0.027	9999	0.51	0.059	0.34	0.96	0.132
9999	9999	9999	9999	9999	9999	9999	0.55	0.09	0.47	2.05	0.17	9999	0.108	0.052	0.17	0.12	0.039	9999	1	0.233	0.8	2.77	0.3
9999	0.129	0.23	0.066	0.268	0.027	9999	9999	9999	9999	9999	9999	9999	9999	9999	9999	9999	9999	9999	0.29	0.06	0.11	0.385	0.044
9999	0.129	0.23	0.066	0.268	0.027	9999	9999	9999	9999	9999	9999	9999	9999	9999	9999	9999	9999	9999	0.29	0.06	0.11	0.385	0.044
9999	0.129	0.23	0.066	0.268	0.027	9999	9999	9999	9999	9999	9999	9999	9999	9999	9999	9999	9999	9999	0.29	0.06	0.11	0.385	0.044
9999	0.129	0.23	0.066	0.268	0.027	9999	9999	9999	9999	9999	9999	9999	9999	9999	9999	9999	9999	9999	0.29	0.06	0.11	0.385	0.044
9999	0.154	0.3	0.062	0.264	0.03	9999	9999	9999	9999	9999	9999	9999	9999	9999	9999	9999	9999	9999	0.31	0.146	0.24	0.389	0.047
9999	0.154	0.3	0.062	0.264	0.03	9999	9999	9999	9999	9999	9999	9999	9999	9999	9999	9999	9999	9999	0.31	0.146	0.24	0.389	0.047
9999	0.154	0.3	0.062	0.264	0.03	9999	9999	9999	9999	9999	9999	9999	9999	9999	9999	9999	9999	9999	0.31	0.146	0.24	0.389	0.047
9999	0.154	0.3	0.062	0.264	0.03	9999	9999	9999	9999	9999	9999	9999	9999	9999	9999	9999	9999	9999	0.31	0.146	0.24	0.389	0.047
9999	0.162	0.021	0.05	0.241	0.023	9999	9999	9999	9999	9999	9999	9999	9999	9999	9999	9999	9999	9999	0.292	0.046	0.09	0.428	0.052
9999	0.162	0.021	0.05	0.241	0.023	9999	9999	9999	9999	9999	9999	9999	9999	9999	9999	9999	9999	9999	0.292	0.046	0.09	0.428	0.052
9999	0.162	0.021	0.05	0.241	0.023	9999	9999	9999	9999	9999	9999	9999	9999	9999	9999	9999	9999	9999	0.292	0.046	0.09	0.428	0.052
9999	0.162	0.021	0.05	0.241	0.023	9999	9999	9999	9999	9999	9999	9999	9999	9999	9999	9999	9999	9999	0.292	0.046	0.09	0.428	0.052
9999	0.167	0.019	0.109	0.139	0.035	9999	9999	9999	9999	9999	9999	9999	9999	9999	9999	9999	9999	9999	0.43	0.053	0.198	0.305	0.06
9999	0.167	0.019	0.109	0.139	0.035	9999	9999	9999	9999	9999	9999	9999	9999	9999	9999	9999	9999	9999	0.43	0.053	0.198	0.305	0.06
9999	0.167	0.019	0.109	0.139	0.035	9999	9999	9999	9999	9999	9999	9999	9999	9999	9999	9999	9999	9999	0.43	0.053	0.198	0.305	0.06
9999	0.167	0.019	0.109	0.139	0.035	9999	9999	9999	9999	9999	9999	9999	9999	9999	9999	9999	9999	9999	0.43	0.053	0.198	0.305	0.06
9999	0.15	0.012	0.021	0.73	0.028	9999	9999	9999	9999	9999	9999	9999	9999	9999	9999	9999	9999	9999	0.24	0.025	0.047	1.14	0.045
9999	0.15	0.012	0.021	0.73	0.028	9999	9999	9999	9999	9999	9999	9999	9999	9999	9999	9999	9999	9999	0.24	0.025	0.047	1.14	0.045
9999	0.15	0.012	0.021	0.73	0.028	9999	9999	9999	9999	9999	9999	9999	9999	9999	9999	9999	9999	9999	0.24	0.025	0.047	1.14	0.045
9999	0.15	0.012	0.021	0.73	0.028	9999	9999	9999	9999	9999	9999	9999	9999	9999	9999	9999	9999	9999	0.24	0.025	0.047	1.14	0.045
9999	0.233	0.024	0.11	0.196	0.024	9999	9999	9999	9999	9999	9999	9999	9999	9999	9999	9999	9999	9999	0.43	0.046	0.12	0.296	0.072
9999	0.233	0.024	0.11	0.196	0.024	9999	9999	9999	9999	9999	9999	9999	9999	9999	9999	9999	9999	9999	0.43	0.046	0.12	0.296	0.072
9999	0.233	0.024	0.11	0.196	0.024	9999	9999	9999	9999	9999	9999	9999	9999	9999	9999	9999	9999	9999	0.43	0.046	0.12	0.296	0.072
9999	0.233	0.024	0.11	0.196	0.024	9999	9999	9999	9999	9999	9999	9999	9999	9999	9999	9999	9999	9999	0.43	0.046	0.12	0.296	0.072
9999	0.254	0.04	0.16	0.5	0.038	9999	9999	9999	9999	9999	9999	9999	9999	9999	9999	9999	9999	9999	0.417	0.052	0.17	0.69	0.05
9999	0.254	0.04	0.16	0.5	0.038	9999	9999	9999	9999	9999	9999	9999	9999	9999	9999	9999	9999	9999	0.417	0.052	0.17	0.69	0.05
9999	0.254	0.04	0.16	0.5	0.038	9999	9999	9999	9999	9999	9999	9999	9999	9999	9999	9999	9999	9999	0.417	0.052	0.17	0.69	0.05
9999	0.254	0.04	0.16	0.5	0.038	9999	9999	9999	9999	9999	9999	9999	9999	9999	9999	9999	9999	9999	0.417	0.052	0.17	0.69	0.05
9999	0.267	0.024	0.13	0.53	0.041	9999	9999	9999	9999	9999	9999	9999	9999	9999	9999	9999	9999	9999	0.422	0.055	0.21	0.75	0.066
9999	0.267	0.024	0.13	0.53	0.041	9999	9999	9999	9999	9999	9999	9999	9999	9999	9999	9999	9999	9999	0.422	0.055	0.21	0.75	0.066
9999	0.267	0.024	0.13	0.53	0.041	9999	9999	9999	9999	9999	9999	9999	9999	9999	9999	9999	9999	9999	0.422	0.055	0.21	0.75	0.066
9999	0.267	0.024	0.13	0.53	0.041	9999	9999	9999	9999	9999	9999	9999	9999	9999	9999	9999	9999	9999	0.422	0.055	0.21	0.75	0.066
9999	9999	9999	9999	9999	9999	9999	9999	9999	9999	9999	9999	9999	9999	9999	9999	9999	9999	9999	9999	9999	9999	9999	9999
9999	9999	9999	9999	9999	9999	9999	9999	9999	9999	9999	9999	9999	9999	9999	9999	9999	9999	9999	9999	9999	9999	9999	9999
9999	9999	9999	9999	9999	9999	9999	9999	9999	9999	9999	9999	9999	9999	9999	9999	9999	9999	9999	9999	9999	9999	9999	9999
9999	9999	9999	9999	9999	9999	9999	9999	9999	9999	9999	9999	9999	9999	9999	9999	9999	9999	9999	9999	9999	9999	9999	9999
9999	9999	9999	9999	9999	9999	9999	9999	9999	9999	9999	9999	9999	9999	9999	9999	9999	9999	9999	9999	9999	9999	9999	9999
9999	9999	9999	9999	9999	9999	9999	9999	9999	9999	9999	9999	9999	9999	9999	9999	9999	9999	9999	9999	9999	9999	9999	9999
9999	9999	9999	9999	9999	9999	9999	9999	9999	9999	9999	9999	9999	9999	9999	9999	9999	9999	9999	9999	9999	9999	9999	9999
9999	9999	9999	9999	9999	9999	9999	9999	9999	9999	9999	9999	9999	9999	9999	9999	9999	9999	9999	9999	9999	9999	9999	9999
9999	9999	9999	9999	9999	9999	9999	9999	9999	9999	9999	9999	9999	9999	9999	9999	9999	9999	9999	9999	9999	9999	9999	9999
9999	9999	9999	9999	9999	9999	9999	9999	9999	9999	9999	9999	9999	9999	9999	9999	9999	9999	9999	9999	9999	9999	9999	9999
9999	9999	9999	9999	9999	9999	9999	9999	9999	9999	9999	9999	9999	9999	9999	9999	9999	9999	9999	9999	9999	9999	9999	9999
9999	9999	9999	9999	9999	9999	9999	9999	9999	9999	9999	9999	9999	9999	9999	9999	9999	9999	9999	9999	9999	9999	9999	9999
9999	9999	9999	9999	9999	9999	9999	0.88	9999	0.4	0.64	0.08	9999	0.21	9999	0.067	0.067	0.017	9999	0.53	9999	0.28	0.28	0.043
9999	9999	9999	9999	9999	9999	9999	0.63	9999	0.23	0.62	0.08	9999	0.12	9999	0.072	0.068	0.018	9999	0.55	9999	0.29	0.28	0.07
9999	9999	9999	9999	9999	9999	9999	0.6	9999	0.21	0.72	0.07	9999	0.11	9999	0.07	0.072	0.019	9999	0.52	9999	0.28	0.3	0.061
9999	9999	9999	9999	9999	9999	9999	0.6	9999	0.21	0.97	0.07	9999	0.12	9999	0.07	0.087	0.022	9999	0.55	9999	0.29	0.39	0.053
9999	9999	9999	9999	9999	9999	9999	0.62	9999	0.22	1	0.07	9999	0.11	9999	0.07	0.087	0.022	9999	0.55	9999	0.29	0.39	0.053
9999	9999	9999	9999	9999	9999	9999	0.61	9999	0.22	0.99	0.07	9999	0.11	9999	0.07	0.085	0.022	9999	0.54	9999	0.29	0.38	0.053
9999	9999	9999	9999	9999	9999	9999	9999	9999	0.13	1.25	0.07	9999	9999	9999	0.18	0.09	0.01	9999	9999	9999	9999	9999	9999
9999	9999	9999	9999	9999	9999	9999	9999	9999	0.34	2.36	0.18	9999	9999	9999	0.18	0.11	0.04	9999	9999	9999	9999	9999	9999
9999	9999	9999	9999	9999	9999	9999	9999	9999	0.13	0.3	0.02	9999	9999	9999	0.24	0.07	0.01	9999	9999	9999	9999	9999	9999
9999	9999	9999	9999	9999	9999	9999	9999	9999	0.24	0.68	0.01	9999	9999	9999	0.14	0.05	0.003	9999	9999	9999	9999	9999	9999
9999	9999	9999	9999	9999	9999	9999	9999	9999	9999	9999	9999	9999	9999	9999	9999	9999	9999	9999	9999	9999	9999	9999	9999
9999	9999	9999	9999	9999	9999	9999	9999	9999	9999	9999	9999	9999	9999	9999	9999	9999	9999	9999	9999	9999	9999	9999	9999
9999	9999	9999	9999	9999	9999	9999	9999	9999	9999	9999	9999	9999	9999	9999	9999	9999	9999	9999	9999	9999	9999	9999	9999
9999	9999	9999	9999	9999	9999	9999	0.34	0.048	0.11	0.63	0.066	9999	0.093	0.012	0.032	0.089	0.019	9999	0.3	0.046	0.12	0.48	0.061
9999	9999	9999	9999	9999	9999	9999	1.42	0.13	0.33	1.3	0.21	9999	0.22	0.013	0.116	0.123	0.019	9999	0.65	0.088	0.29	0.74	0.091
9999	9999	9999	9999	9999	9999	9999	0.96	0.067	0.28	0.87	0.11	9999	0.184	0.008	0.097	0.102	0.011	9999	0.78	0.089	0.49	1.04	0.11
9999	9999	9999	9999	9999	9999	9999	0.86	0.11	0.29	0.88	0.082	9999	0.206	0.012	0.073	0.055	0.016	9999	0.8	0.077	0.41	1.18	0.11
9999	9999	9999	9999	9999	9999	9999	0.4	0.095	0.29	0.99	0.081	9999	0.138	0.009	0.071	0.091	0.014	9999	0.6	0.176	0.4	0.69	0.1
9999	9999	9999	9999	9999	9999	9999	0.54	0.065	0.3	1.09	0.12	9999	0.127	0.0057	0.079	0.112	0.022	9999	0.75	0.166	0.5	0.97	0.15
9999	9999	9999	9999	9999	9999	9999	9999	9999	9999	9999	9999	9999	9999	9999	9999	9999	9999	9999	9999	9999	9999	9999	9999
9999	0.42	0.042	0.216	0.188	0.006	9999	9999	9999	9999	9999	9999	9999	9999	9999	9999	9999	9999	9999	9999	9999	9999	9999	9999
9999	0.47	0.041	0.237	0.104	0.017	9999	9999	9999	9999	9999	9999	9999	9999	9999	9999	9999	9999	9999	9999	9999	9999	9999	9999
9999	0.48	0.043	0.25	0.141	0.035	9999	9999	9999	9999	9999	9999	9999	9999	9999	9999	9999	9999	9999	9999	9999	9999	9999	9999
9999	9999	9999	9999	9999	9999	9999	9999	9999	9999	9999	9999	9999	9999	9999	9999	9999	9999	9999	9999	9999	9999	9999	9999
9999	9999	9999	9999	9999	9999	9999	9999	9999	9999	9999	9999	9999	9999	9999	0.0475	0.0911	0.014	9999	9999	9999	9999	9999	9999
9999	9999	9999	9999	9999	9999	9999	9999	9999	9999	9999	9999	9999	9999	9999	0.0653	0.1173	0.019	9999	9999	9999	9999	9999	9999
9999	9999	9999	9999	9999	9999	9999	9999	9999	9999	9999	9999	9999	9999	9999	0.0522	0.0908	0.0138	9999	9999	9999	9999	9999	9999
9999	9999	9999	9999	9999	9999	9999	9999	9999	9999	9999	9999	9999	9999	9999	0.0507	0.0939	0.0128	9999	9999	9999	9999	9999	9999
9999	9999	9999	9999	9999	9999	9999	9999	9999	9999	9999	9999	9999	9999	9999	0.058	0.1084	0.0207	9999	9999	9999	9999	9999	9999
9999	9999	9999	9999	9999	9999	9999	9999	9999	9999	9999	9999	9999	9999	9999	0.0674	0.0981	0.0157	9999	9999	9999	9999	9999	9999
9999	9999	9999	9999	9999	9999	9999	9999	9999	9999	9999	9999	9999	9999	9999	0.0631	0.0811	0.014	9999	9999	9999	9999	9999	9999
9999	9999	9999	9999	9999	9999	9999	9999	9999	9999	9999	9999	9999	9999	9999	0.0457	0.0855	0.0142	9999	9999	9999	9999	9999	9999
9999	9999	9999	9999	9999	9999	9999	9999	9999	9999	9999	9999	9999	9999	9999	0.0449	0.0932	0.0142	9999	9999	9999	9999	9999	9999
9999	9999	9999	9999	9999	9999	9999	9999	9999	9999	9999	9999	9999	9999	9999	0.0567	0.0757	0.0137	9999	9999	9999	9999	9999	9999
9999	9999	9999	9999	9999	9999	9999	9999	9999	9999	9999	9999	9999	9999	9999	0.0429	0.0773	0.0138	9999	9999	9999	9999	9999	9999
9999	9999	9999	9999	9999	9999	9999	9999	9999	9999	9999	9999	9999	9999	9999	0.0464	0.0779	0.0183	9999	9999	9999	9999	9999	9999
9999	9999	9999	9999	9999	9999	9999	9999	9999	9999	9999	9999	9999	9999	9999	0.0407	0.074	0.0143	9999	9999	9999	9999	9999	9999
9999	9999	9999	9999	9999	9999	9999	9999	9999	9999	9999	9999	9999	9999	9999	0.0429	0.0786	0.0175	9999	9999	9999	9999	9999	9999
9999	9999	9999	9999	9999	9999	9999	9999	9999	9999	9999	9999	9999	9999	9999	0.0531	0.0813	0.0215	9999	9999	9999	9999	9999	9999
9999	9999	9999	9999	9999	9999	9999	9999	9999	9999	9999	9999	9999	9999	9999	0.0719	0.0832	0.0155	9999	9999	9999	9999	9999	9999
9999	9999	9999	9999	9999	9999	9999	9999	9999	9999	9999	9999	9999	9999	9999	0.0525	0.0774	0.0134	9999	9999	9999	9999	9999	9999
9999	9999	9999	9999	9999	9999	9999	9999	9999	9999	9999	9999	9999	9999	9999	0.0425	0.0956	0.0133	9999	9999	9999	9999	9999	9999
9999	9999	9999	9999	9999	9999	9999	9999	9999	9999	9999	9999	9999	9999	9999	0.0384	0.0763	0.0117	9999	9999	9999	9999	9999	9999
9999	9999	9999	9999	9999	9999	9999	0.46	0.03	9999	9999	9999	9999	0.13	0.01	9999	9999	9999	9999	0.32	0.06	9999	9999	9999
9999	9999	9999	9999	9999	9999	9999	0.39	0.08	9999	9999	9999	9999	0.06	0.006	9999	9999	9999	9999	0.6	0.07	9999	9999	9999
9999	9999	9999	9999	9999	9999	9999	0.41	0.05	9999	9999	9999	9999	0.08	0.007	9999	9999	9999	9999	0.51	0.07	9999	9999	9999
9999	9999	9999	9999	9999	9999	9999	0.35	0.06	9999	9999	9999	9999	0.09	0.009	9999	9999	9999	9999	0.43	0.06	9999	9999	9999
9999	9999	9999	9999	9999	9999	9999	0.56	0.08	9999	9999	9999	9999	0.07	0.005	9999	9999	9999	9999	0.52	0.07	9999	9999	9999
9999	9999	9999	9999	9999	9999	9999	9999	9999	9999	9999	9999	9999	9999	9999	0.0587	0.106	0.0237	9999	9999	9999	9999	9999	9999
9999	9999	9999	9999	9999	9999	9999	9999	9999	9999	9999	9999	9999	9999	9999	0.064	0.11	0.0236	9999	9999	9999	9999	9999	9999
9999	9999	9999	9999	9999	9999	9999	9999	9999	9999	9999	9999	9999	9999	9999	0.0495	0.126	0.0196	9999	9999	9999	9999	9999	9999
9999	9999	9999	9999	9999	9999	9999	9999	9999	9999	9999	9999	9999	9999	9999	9999	9999	9999	9999	9999	9999	9999	9999	9999
9999	9999	9999	9999	9999	9999	9999	9999	0.039	0.267	2.934	0.037	9999	9999	9999	9999	9999	9999	9999	9999	9999	9999	9999	9999
9999	9999	9999	9999	9999	9999	9999	0.378	0.028	0.124	1.034	0.044	9999	0.12	0.01	0.05	0.08	0.02	9999	0.56	0.067	0.2	0.63	0.07
9999	9999	9999	9999	9999	9999	9999	0.368	0.038	0.28	1.45	0.088	9999	0.06	0.01	0.07	0.16	0.02	9999	0.63	0.08	0.383	1.843	0.143
9999	9999	9999	9999	9999	9999	9999	0.318	0.048	0.227	1.652	0.06	9999	0.05	0	0.03	0.1	0.01	9999	0.593	0.087	0.48	0.813	0.073
9999	9999	9999	9999	9999	9999	9999	0.31	0.043	0.236	0.927	0.052	9999	0.05	0	0.14	0.08	0.02	9999	0.447	0.097	0.5	0.58	0.07
9999	9999	9999	9999	9999	9999	9999	0.956	0.052	0.2	1.69	0.048	9999	0.24	0.01	0.05	0.09	0.01	9999	0.883	0.057	0.17	0.443	0.043
9999	9999	9999	9999	9999	9999	9999	0.452	0.04	0.247	3.29	0.05	9999	0.07	0.01	0.18	0.21	0.03	9999	0.44	0.057	0.343	1.157	0.05
9999	9999	9999	9999	9999	9999	9999	0.282	0.035	0.108	0.548	0.02	9999	0.09	0.02	0.11	0.1	0.02	9999	0.407	0.05	0.173	0.58	0.03
9999	9999	9999	9999	9999	9999	9999	0.446	0.03	0.144	1.22	0.054	9999	0.09	0.01	0.08	0.12	0.02	9999	9999	9999	9999	9999	9999
9999	9999	9999	9999	9999	9999	9999	0.362	0.02	0.122	3.348	0.03	9999	0.14	0	0.08	0.04	0	9999	0.447	0.057	0.213	1.14	0.077
9999	9999	9999	9999	9999	9999	9999	9999	9999	9999	9999	9999	9999	9999	9999	9999	9999	9999	9999	9999	9999	9999	9999	9999
9999	9999	9999	9999	9999	9999	9999	9999	9999	9999	9999	9999	9999	9999	9999	9999	9999	9999	9999	9999	9999	9999	9999	9999
9999	9999	9999	9999	9999	9999	9999	9999	9999	9999	9999	9999	9999	9999	9999	9999	9999	9999	9999	9999	9999	9999	9999	9999
9999	9999	9999	9999	9999	9999	9999	9999	9999	9999	9999	9999	9999	9999	9999	9999	9999	9999	9999	9999	9999	9999	9999	9999
9999	9999	9999	9999	9999	9999	9999	0.288	0.061	0.076	1.175	0.046	9999	0.075	0.008	0.017	0.115	0.013	9999	0.336	0.043	0.088	0.664	0.056
9999	9999	9999	9999	9999	9999	9999	0.33	0.099	0.108	0.917	0.044	9999	0.071	0.007	0.01	0.103	0.007	9999	0.675	0.115	0.084	0.574	0.032
9999	9999	9999	9999	9999	9999	9999	0.323	0.051	0.075	1.012	0.034	9999	0.091	0.009	0.021	0.099	0.015	9999	0.387	0.049	0.091	0.493	0.033
9999	0.628	0.09	0.852	0.807	0.083	9999	9999	9999	9999	9999	9999	9999	9999	9999	9999	9999	9999	9999	0.422	0.667	0.756	0.6	0.067
9999	0.305	0.063	0.311	0.418	0.044	9999	9999	9999	9999	9999	9999	9999	9999	9999	9999	9999	9999	9999	0.454	0.111	0.507	0.782	0.082
9999	0.261	0.042	0.257	0.372	0.052	9999	9999	9999	9999	9999	9999	9999	9999	9999	9999	9999	9999	9999	0.502	0.093	0.461	0.932	0.084
9999	0.257	0.043	0.26	0.489	0.046	9999	9999	9999	9999	9999	9999	9999	9999	9999	9999	9999	9999	9999	0.409	0.1	0.571	1.129	0.162
9999	9999	9999	9999	9999	9999	9999	9999	9999	9999	9999	9999	9999	9999	9999	9999	9999	9999	9999	9999	9999	9999	9999	9999
9999	9999	9999	9999	9999	9999	9999	0.326	0.065	0.333	0.822	0.078	9999	0.088	0.014	0.102	0.1	0.022	9999	0.354	0.072	0.312	0.887	0.072
9999	9999	9999	9999	9999	9999	9999	0.39	0.032	0.162	0.844	0.032	9999	0.107	0.021	0.075	0.064	0.016	9999	0.387	0.06	0.179	0.477	0.06
9999	0.106	0.01	0.027	0.278	0.017	9999	9999	9999	9999	9999	9999	9999	9999	9999	9999	9999	9999	9999	0.315	0.031	0.057	0.2	0.043
9999	9999	9999	9999	9999	9999	9999	0.45	0.03	0.17	2.15	0.1	9999	0.17	0.03	0.09	0.13	0.03	9999	9999	9999	9999	9999	9999
9999	9999	9999	9999	9999	9999	9999	9999	9999	9999	9999	9999	9999	9999	9999	0.0809	0.2639	0.0238	9999	9999	9999	9999	9999	9999
9999	9999	9999	9999	9999	9999	9999	9999	9999	9999	9999	9999	9999	9999	9999	0.0611	0.2339	0.0234	9999	9999	9999	9999	9999	9999
9999	9999	9999	9999	9999	9999	9999	9999	9999	9999	9999	9999	9999	9999	9999	0.0899	0.1938	0.0231	9999	9999	9999	9999	9999	9999
9999	9999	9999	9999	9999	9999	9999	9999	9999	9999	9999	9999	9999	9999	9999	0.0878	0.2413	0.0237	9999	9999	9999	9999	9999	9999
9999	9999	9999	9999	9999	9999	9999	9999	9999	9999	9999	9999	9999	9999	9999	0.0906	0.198	0.0246	9999	9999	9999	9999	9999	9999
9999	9999	9999	9999	9999	9999	9999	9999	9999	9999	9999	9999	9999	9999	9999	0.0884	0.1912	0.0232	9999	9999	9999	9999	9999	9999
9999	9999	9999	9999	9999	9999	9999	9999	9999	9999	9999	9999	9999	9999	9999	0.0725	0.2115	0.0249	9999	9999	9999	9999	9999	9999
9999	9999	9999	9999	9999	9999	9999	9999	9999	9999	9999	9999	9999	9999	9999	0.0773	0.2677	0.0246	9999	9999	9999	9999	9999	9999
9999	9999	9999	9999	9999	9999	9999	0.338	0.021	0.078	0.473	0.043	9999	0.086	0.007	0.034	0.051	0.017	9999	0.285	0.025	0.103	0.312	0.039
9999	9999	9999	9999	9999	9999	9999	0.316	0.018	0.08	0.478	0.045	9999	0.081	0.006	0.045	0.049	0.019	9999	0.274	0.024	0.114	0.272	0.041
9999	9999	9999	9999	9999	9999	9999	0.355	0.019	0.071	0.401	0.045	9999	0.084	0.004	0.042	0.041	0.018	9999	0.258	0.019	0.075	0.182	0.034
9999	9999	9999	9999	9999	9999	9999	9999	9999	9999	9999	9999	9999	9999	9999	9999	9999	9999	9999	9999	9999	9999	9999	9999
9999	9999	9999	9999	9999	9999	9999	9999	9999	9999	9999	9999	9999	9999	9999	9999	9999	9999	9999	9999	9999	9999	9999	9999
9999	9999	9999	9999	9999	9999	9999	9999	9999	9999	9999	9999	9999	9999	9999	9999	9999	9999	9999	9999	9999	9999	9999	9999
9999	9999	9999	9999	9999	9999	9999	9999	9999	9999	9999	9999	9999	9999	9999	9999	9999	9999	9999	9999	9999	9999	9999	9999
9999	9999	9999	9999	9999	9999	9999	9999	9999	9999	9999	9999	9999	9999	9999	9999	9999	9999	9999	9999	9999	9999	9999	9999
9999	9999	9999	9999	9999	9999	9999	9999	9999	9999	9999	9999	9999	9999	9999	9999	9999	9999	9999	9999	9999	9999	9999	9999
9999	9999	9999	9999	9999	9999	9999	9999	9999	9999	9999	9999	9999	9999	9999	9999	9999	9999	9999	9999	9999	9999	9999	9999
9999	9999	9999	9999	9999	9999	9999	0.319	0.042	0.147	1.34	0.039	9999	0.124	0.002	0.091	0.051	0.0099	9999	0.315	0.027	0.207	0.52	0.0415
9999	9999	9999	9999	9999	9999	9999	0.415	0.047	0.182	2.51	0.0539	9999	0.166	0.014	0.1	0.091	0.0153	9999	0.28	0.07	0.243	0.57	0.0656
9999	9999	9999	9999	9999	9999	9999	0.228	0.06	0.123	0.109	0.09	9999	0.088	0.007	0.047	0.082	0.0267	9999	0.183	0.042	0.113	0.189	0.082
9999	9999	9999	9999	9999	9999	9999	0.564	0.063	0.196	1.21	0.0521	9999	0.118	0.02	0.128	0.055	0.0233	9999	0.398	0.044	0.169	0.515	0.0298
9999	9999	9999	9999	9999	9999	9999	9999	9999	9999	9999	9999	9999	9999	9999	9999	9999	9999	9999	9999	9999	9999	9999	9999
9999	9999	9999	9999	9999	9999	9999	9999	9999	9999	9999	9999	9999	9999	9999	9999	9999	9999	9999	9999	9999	9999	9999	9999
9999	9999	9999	9999	9999	9999	9999	9999	9999	9999	9999	9999	9999	9999	9999	9999	9999	9999	9999	9999	9999	9999	9999	9999
9999	9999	9999	9999	9999	9999	9999	9999	9999	9999	9999	9999	9999	9999	9999	9999	9999	9999	9999	9999	9999	9999	9999	9999
9999	9999	9999	9999	9999	9999	9999	9999	9999	9999	9999	9999	9999	9999	9999	9999	9999	9999	9999	9999	9999	9999	9999	9999
9999	9999	9999	9999	9999	9999	9999	9999	9999	9999	9999	9999	9999	9999	9999	9999	9999	9999	9999	9999	9999	9999	9999	9999
9999	9999	9999	9999	9999	9999	9999	9999	9999	9999	9999	9999	9999	9999	9999	9999	9999	9999	9999	9999	9999	9999	9999	9999
9999	9999	9999	9999	9999	9999	9999	9999	9999	9999	9999	9999	9999	9999	9999	9999	9999	9999	9999	9999	9999	9999	9999	9999
9999	0.14	0.01	0.07	0.25	0.02	9999	9999	9999	9999	9999	9999	9999	9999	9999	9999	9999	9999	9999	0.6	0.05	0.18	0.56	0.05
9999	9999	9999	9999	9999	9999	9999	9999	9999	9999	9999	9999	9999	9999	9999	9999	9999	9999	9999	9999	9999	9999	9999	9999
9999	9999	9999	9999	9999	9999	9999	9999	9999	9999	9999	9999	9999	9999	9999	9999	9999	9999	9999	9999	9999	9999	9999	9999
9999	9999	9999	9999	9999	9999	9999	9999	9999	9999	9999	9999	9999	9999	9999	9999	9999	9999	9999	9999	9999	9999	9999	9999
9999	9999	9999	9999	9999	9999	9999	9999	9999	9999	9999	9999	9999	9999	9999	9999	9999	9999	9999	9999	9999	9999	9999	9999
9999	9999	9999	9999	9999	9999	9999	9999	9999	9999	9999	9999	9999	9999	9999	9999	9999	9999	9999	9999	9999	9999	9999	9999
9999	9999	9999	9999	9999	9999	9999	9999	9999	9999	9999	9999	9999	9999	9999	9999	9999	9999	9999	9999	9999	9999	9999	9999
9999	9999	9999	9999	9999	9999	9999	9999	9999	9999	9999	9999	9999	9999	9999	9999	9999	9999	9999	9999	9999	9999	9999	9999
9999	9999	9999	9999	9999	9999	9999	9999	9999	9999	9999	9999	9999	9999	9999	9999	9999	9999	9999	9999	9999	9999	9999	9999
9999	9999	9999	9999	9999	9999	9999	9999	9999	9999	9999	9999	9999	9999	9999	9999	9999	9999	9999	9999	9999	9999	9999	9999
9999	9999	9999	9999	9999	9999	9999	9999	9999	9999	9999	9999	9999	9999	9999	9999	9999	9999	9999	9999	9999	9999	9999	9999
9999	9999	9999	9999	9999	9999	9999	9999	9999	9999	9999	9999	9999	9999	9999	9999	9999	9999	9999	9999	9999	9999	9999	9999
9999	9999	9999	9999	9999	9999	9999	9999	9999	9999	9999	9999	9999	9999	9999	9999	9999	9999	9999	9999	9999	9999	9999	9999
9999	9999	9999	9999	9999	9999	9999	9999	9999	9999	9999	9999	9999	9999	9999	9999	9999	9999	9999	9999	9999	9999	9999	9999
9999	9999	9999	9999	9999	9999	9999	9999	9999	9999	9999	9999	9999	9999	9999	9999	9999	9999	9999	9999	9999	9999	9999	9999
9999	9999	9999	9999	9999	9999	9999	9999	9999	9999	9999	9999	9999	9999	9999	9999	9999	9999	9999	9999	9999	9999	9999	9999
9999	9999	9999	9999	9999	9999	9999	9999	9999	9999	9999	9999	9999	9999	9999	9999	9999	9999	9999	9999	9999	9999	9999	9999
9999	9999	9999	9999	9999	9999	9999	9999	9999	9999	9999	9999	9999	9999	9999	9999	9999	9999	9999	9999	9999	9999	9999	9999
9999	9999	9999	9999	9999	9999	9999	9999	9999	9999	9999	9999	9999	9999	9999	9999	9999	9999	9999	9999	9999	9999	9999	9999
9999	9999	9999	9999	9999	9999	9999	9999	9999	9999	9999	9999	9999	9999	9999	9999	9999	9999	9999	9999	9999	9999	9999	9999
9999	9999	9999	9999	9999	9999	9999	9999	9999	9999	9999	9999	9999	9999	9999	9999	9999	9999	9999	9999	9999	9999	9999	9999
9999	9999	9999	9999	9999	9999	9999	9999	9999	9999	9999	9999	9999	9999	9999	9999	9999	9999	9999	9999	9999	9999	9999	9999
9999	9999	9999	9999	9999	9999	9999	9999	9999	9999	9999	9999	9999	9999	9999	9999	9999	9999	9999	9999	9999	9999	9999	9999
9999	9999	9999	9999	9999	9999	9999	9999	9999	9999	9999	9999	9999	9999	9999	9999	9999	9999	9999	9999	9999	9999	9999	9999
9999	9999	9999	9999	9999	9999	9999	9999	9999	9999	9999	9999	9999	9999	9999	9999	9999	9999	9999	9999	9999	9999	9999	9999
9999	9999	9999	9999	9999	9999	9999	9999	9999	9999	9999	9999	9999	9999	9999	9999	9999	9999	9999	9999	9999	9999	9999	9999
9999	9999	9999	9999	9999	9999	9999	9999	9999	9999	9999	9999	9999	9999	9999	9999	9999	9999	9999	9999	9999	9999	9999	9999
9999	9999	9999	9999	9999	9999	9999	9999	9999	9999	9999	9999	9999	9999	9999	9999	9999	9999	9999	9999	9999	9999	9999	9999
9999	9999	9999	9999	9999	9999	9999	9999	9999	9999	9999	9999	9999	9999	9999	9999	9999	9999	9999	9999	9999	9999	9999	9999
9999	9999	9999	9999	9999	9999	9999	9999	9999	9999	9999	9999	9999	9999	9999	9999	9999	9999	9999	9999	9999	9999	9999	9999
9999	9999	9999	9999	9999	9999	9999	9999	9999	9999	9999	9999	9999	9999	9999	9999	9999	9999	9999	9999	9999	9999	9999	9999
9999	9999	9999	9999	9999	9999	9999	9999	9999	9999	9999	9999	9999	9999	9999	9999	9999	9999	9999	9999	9999	9999	9999	9999
9999	9999	9999	9999	9999	9999	9999	9999	9999	9999	9999	9999	9999	9999	9999	9999	9999	9999	9999	9999	9999	9999	9999	9999
9999	9999	9999	9999	9999	9999	9999	9999	9999	9999	9999	9999	9999	9999	9999	9999	9999	9999	9999	9999	9999	9999	9999	9999
9999	9999	9999	9999	9999	9999	9999	9999	9999	9999	9999	9999	9999	9999	9999	9999	9999	9999	9999	9999	9999	9999	9999	9999
9999	9999	9999	9999	9999	9999	9999	9999	9999	9999	9999	9999	9999	9999	9999	9999	9999	9999	9999	9999	9999	9999	9999	9999
9999	9999	9999	9999	9999	9999	9999	9999	9999	9999	9999	9999	9999	9999	9999	9999	9999	9999	9999	9999	9999	9999	9999	9999
9999	9999	9999	9999	9999	9999	9999	9999	9999	9999	9999	9999	9999	9999	9999	9999	9999	9999	9999	9999	9999	9999	9999	9999
9999	9999	9999	9999	9999	9999	9999	9999	9999	9999	9999	9999	9999	9999	9999	9999	9999	9999	9999	9999	9999	9999	9999	9999
9999	9999	9999	9999	9999	9999	9999	9999	9999	9999	9999	9999	9999	9999	9999	9999	9999	9999	9999	9999	9999	9999	9999	9999
9999	9999	9999	9999	9999	9999	9999	9999	9999	9999	9999	9999	9999	9999	9999	9999	9999	9999	9999	9999	9999	9999	9999	9999
9999	9999	9999	9999	9999	9999	9999	9999	9999	9999	9999	9999	9999	9999	9999	9999	9999	9999	9999	9999	9999	9999	9999	9999
9999	9999	9999	9999	9999	9999	9999	9999	9999	9999	9999	9999	9999	9999	9999	9999	9999	9999	9999	9999	9999	9999	9999	9999
9999	9999	9999	9999	9999	9999	9999	9999	9999	9999	9999	9999	9999	9999	9999	9999	9999	9999	9999	9999	9999	9999	9999	9999
9999	9999	9999	9999	9999	9999	9999	9999	9999	9999	9999	9999	9999	9999	9999	9999	9999	9999	9999	9999	9999	9999	9999	9999
9999	9999	9999	9999	9999	9999	9999	9999	9999	9999	9999	9999	9999	9999	9999	9999	9999	9999	9999	9999	9999	9999	9999	9999
9999	9999	9999	9999	9999	9999	9999	9999	9999	9999	9999	9999	9999	9999	9999	9999	9999	9999	9999	9999	9999	9999	9999	9999
9999	9999	9999	9999	9999	9999	9999	9999	9999	9999	9999	9999	9999	9999	9999	9999	9999	9999	9999	9999	9999	9999	9999	9999
9999	9999	9999	9999	9999	9999	9999	9999	9999	9999	9999	9999	9999	9999	9999	9999	9999	9999	9999	9999	9999	9999	9999	9999
9999	9999	9999	9999	9999	9999	9999	9999	9999	9999	9999	9999	9999	9999	9999	9999	9999	9999	9999	9999	9999	9999	9999	9999
9999	9999	9999	9999	9999	9999	9999	9999	9999	9999	9999	9999	9999	9999	9999	9999	9999	9999	9999	9999	9999	9999	9999	9999
9999	9999	9999	9999	9999	9999	9999	9999	9999	9999	9999	9999	9999	9999	9999	9999	9999	9999	9999	9999	9999	9999	9999	9999
9999	9999	9999	9999	9999	9999	9999	9999	9999	9999	9999	9999	9999	9999	9999	9999	9999	9999	9999	9999	9999	9999	9999	9999
9999	9999	9999	9999	9999	9999	9999	0.439	0.062	0.131	0.497	0.062	9999	0.078	0.006	0.02	0.133	0.013	9999	0.35	0.043	0.117	0.41	0.057
9999	9999	9999	9999	9999	9999	9999	0.474	0.069	0.165	0.46	0.062	9999	0.078	0.008	0.019	0.143	0.011	9999	0.296	0.031	0.11	0.286	0.037
9999	9999	9999	9999	9999	9999	9999	0.409	0.05	0.202	1.108	0.069	9999	0.064	0.004	0.022	0.164	0.009	9999	0.394	0.056	0.148	0.501	0.046
9999	9999	9999	9999	9999	9999	9999	0.301	0.044	0.118	1.315	0.066	9999	0.082	0.007	0.019	0.166	0.013	9999	0.31	0.036	0.111	0.397	0.048
9999	9999	9999	9999	9999	9999	9999	0.574	0.083	0.39	1.355	0.113	9999	0.073	0.008	0.024	0.107	0.012	9999	0.498	0.069	0.226	0.445	0.054
9999	9999	9999	9999	9999	9999	9999	9999	9999	9999	9999	9999	9999	9999	9999	9999	9999	9999	9999	9999	9999	9999	9999	9999
9999	9999	9999	9999	9999	9999	9999	0.317	0.048	0.067	0.102	0.04	9999	0.094	0.008	0.017	0.062	0.01	9999	0.286	0.034	0.053	0.411	0.025
9999	9999	9999	9999	9999	9999	9999	9999	9999	9999	9999	9999	9999	9999	9999	9999	9999	9999	9999	9999	9999	9999	9999	9999
9999	9999	9999	9999	9999	9999	9999	9999	9999	9999	9999	9999	9999	9999	9999	9999	9999	9999	9999	9999	9999	9999	9999	9999
9999	9999	9999	9999	9999	9999	9999	9999	9999	9999	9999	9999	9999	9999	9999	9999	9999	9999	9999	9999	9999	9999	9999	9999
9999	9999	9999	9999	9999	9999	9999	9999	9999	9999	9999	9999	9999	9999	9999	9999	9999	9999	9999	9999	9999	9999	9999	9999
9999	9999	9999	9999	9999	9999	9999	9999	9999	9999	9999	9999	9999	9999	9999	9999	9999	9999	9999	9999	9999	9999	9999	9999
9999	9999	9999	9999	9999	9999	9999	9999	9999	9999	9999	9999	9999	9999	9999	9999	9999	9999	9999	9999	9999	9999	9999	9999
9999	9999	9999	9999	9999	9999	9999	9999	9999	9999	9999	9999	9999	9999	9999	9999	9999	9999	9999	9999	9999	9999	9999	9999
9999	9999	9999	9999	9999	9999	9999	9999	9999	9999	9999	9999	9999	9999	9999	9999	9999	9999	9999	9999	9999	9999	9999	9999
9999	9999	9999	9999	9999	9999	9999	9999	9999	9999	9999	9999	9999	9999	9999	9999	9999	9999	9999	9999	9999	9999	9999	9999
9999	9999	9999	9999	9999	9999	9999	9999	9999	9999	9999	9999	9999	9999	9999	9999	9999	9999	9999	9999	9999	9999	9999	9999
9999	9999	9999	9999	9999	9999	9999	9999	9999	9999	9999	9999	9999	9999	9999	9999	9999	9999	9999	9999	9999	9999	9999	9999
9999	9999	9999	9999	9999	9999	9999	9999	9999	9999	9999	9999	9999	9999	9999	9999	9999	9999	9999	9999	9999	9999	9999	9999
9999	9999	9999	9999	9999	9999	9999	9999	9999	9999	9999	9999	9999	9999	9999	9999	9999	9999	9999	9999	9999	9999	9999	9999
9999	9999	9999	9999	9999	9999	9999	9999	9999	9999	9999	9999	9999	9999	9999	9999	9999	9999	9999	9999	9999	9999	9999	9999
9999	9999	9999	9999	9999	9999	9999	9999	9999	9999	9999	9999	9999	9999	9999	9999	9999	9999	9999	9999	9999	9999	9999	9999
9999	9999	9999	9999	9999	9999	9999	9999	9999	9999	9999	9999	9999	9999	9999	9999	9999	9999	9999	9999	9999	9999	9999	9999
9999	0.15	0.012	0.021	0.73	0.028	9999	9999	9999	9999	9999	9999	9999	9999	9999	9999	9999	9999	9999	0.24	0.025	0.047	1.14	0.045
9999	9999	9999	9999	9999	9999	9999	9999	9999	9999	9999	9999	9999	9999	9999	9999	9999	9999	9999	9999	9999	9999	9999	9999
9999	9999	9999	9999	9999	9999	9999	9999	9999	9999	9999	9999	9999	9999	9999	9999	9999	9999	9999	9999	9999	9999	9999	9999
9999	9999	9999	9999	9999	9999	9999	9999	9999	9999	9999	9999	9999	9999	9999	9999	9999	9999	9999	9999	9999	9999	9999	9999
9999	9999	9999	9999	9999	9999	9999	9999	9999	9999	9999	9999	9999	9999	9999	9999	9999	9999	9999	9999	9999	9999	9999	9999
9999	9999	9999	9999	9999	9999	9999	9999	9999	9999	9999	9999	9999	9999	9999	9999	9999	9999	9999	9999	9999	9999	9999	9999
9999	9999	9999	9999	9999	9999	9999	9999	9999	9999	9999	9999	9999	9999	9999	9999	9999	9999	9999	9999	9999	9999	9999	9999
9999	9999	9999	9999	9999	9999	9999	9999	9999	9999	9999	9999	9999	9999	9999	9999	9999	9999	9999	9999	9999	9999	9999	9999
9999	9999	9999	9999	9999	9999	9999	9999	9999	9999	9999	9999	9999	9999	9999	9999	9999	9999	9999	9999	9999	9999	9999	9999
9999	9999	9999	9999	9999	9999	9999	9999	9999	9999	9999	9999	9999	9999	9999	9999	9999	9999	9999	9999	9999	9999	9999	9999
9999	9999	9999	9999	9999	9999	9999	9999	9999	9999	9999	9999	9999	9999	9999	9999	9999	9999	9999	9999	9999	9999	9999	9999
9999	9999	9999	9999	9999	9999	9999	9999	9999	9999	9999	9999	9999	9999	9999	9999	9999	9999	9999	9999	9999	9999	9999	9999
9999	9999	9999	9999	9999	9999	9999	9999	9999	9999	9999	9999	9999	9999	9999	9999	9999	9999	9999	9999	9999	9999	9999	9999
9999	9999	9999	9999	9999	9999	9999	9999	9999	9999	9999	9999	9999	9999	9999	9999	9999	9999	9999	9999	9999	9999	9999	9999
9999	9999	9999	9999	9999	9999	9999	9999	9999	9999	9999	9999	9999	9999	9999	9999	9999	9999	9999	9999	9999	9999	9999	9999
9999	9999	9999	9999	9999	9999	9999	9999	9999	9999	9999	9999	9999	9999	9999	9999	9999	9999	9999	9999	9999	9999	9999	9999
9999	9999	9999	9999	9999	9999	9999	9999	9999	9999	9999	9999	9999	9999	9999	9999	9999	9999	9999	9999	9999	9999	9999	9999
9999	9999	9999	9999	9999	9999	9999	9999	9999	9999	9999	9999	9999	9999	9999	9999	9999	9999	9999	9999	9999	9999	9999	9999
9999	9999	9999	9999	9999	9999	9999	9999	9999	9999	9999	9999	9999	9999	9999	9999	9999	9999	9999	9999	9999	9999	9999	9999
9999	9999	9999	9999	9999	9999	9999	9999	9999	9999	9999	9999	9999	9999	9999	9999	9999	9999	9999	9999	9999	9999	9999	9999
9999	9999	9999	9999	9999	9999	9999	9999	9999	9999	9999	9999	9999	9999	9999	9999	9999	9999	9999	9999	9999	9999	9999	9999
9999	9999	9999	9999	9999	9999	9999	9999	9999	9999	9999	9999	9999	9999	9999	9999	9999	9999	9999	9999	9999	9999	9999	9999
9999	9999	9999	9999	9999	9999	9999	9999	9999	9999	9999	9999	9999	9999	9999	9999	9999	9999	9999	9999	9999	9999	9999	9999
9999	9999	9999	9999	9999	9999	9999	9999	9999	9999	9999	9999	9999	9999	9999	9999	9999	9999	9999	9999	9999	9999	9999	9999
9999	9999	9999	9999	9999	9999	9999	9999	9999	9999	9999	9999	9999	9999	9999	9999	9999	9999	9999	9999	9999	9999	9999	9999
9999	9999	9999	9999	9999	9999	9999	9999	9999	9999	9999	9999	9999	9999	9999	9999	9999	9999	9999	9999	9999	9999	9999	9999
9999	9999	9999	9999	9999	9999	9999	9999	9999	9999	9999	9999	9999	9999	9999	9999	9999	9999	9999	9999	9999	9999	9999	9999
9999	9999	9999	9999	9999	9999	9999	9999	9999	9999	9999	9999	9999	9999	9999	9999	9999	9999	9999	9999	9999	9999	9999	9999
9999	9999	9999	9999	9999	9999	9999	9999	9999	9999	9999	9999	9999	9999	9999	9999	9999	9999	9999	9999	9999	9999	9999	9999
9999	9999	9999	9999	9999	9999	9999	9999	9999	9999	9999	9999	9999	9999	9999	9999	9999	9999	9999	9999	9999	9999	9999	9999
9999	9999	9999	9999	9999	9999	9999	9999	9999	9999	9999	9999	9999	9999	9999	9999	9999	9999	9999	9999	9999	9999	9999	9999
9999	9999	9999	9999	9999	9999	9999	9999	9999	9999	9999	9999	9999	9999	9999	9999	9999	9999	9999	9999	9999	9999	9999	9999
9999	9999	9999	9999	9999	9999	9999	9999	9999	9999	9999	9999	9999	9999	9999	9999	9999	9999	9999	9999	9999	9999	9999	9999
9999	9999	9999	9999	9999	9999	9999	9999	9999	9999	9999	9999	9999	9999	9999	9999	9999	9999	9999	9999	9999	9999	9999	9999
9999	9999	9999	9999	9999	9999	9999	9999	9999	9999	9999	9999	9999	9999	9999	9999	9999	9999	9999	9999	9999	9999	9999	9999
9999	9999	9999	9999	9999	9999	9999	9999	9999	9999	9999	9999	9999	9999	9999	9999	9999	9999	9999	9999	9999	9999	9999	9999
9999	9999	9999	9999	9999	9999	9999	9999	9999	9999	9999	9999	9999	9999	9999	9999	9999	9999	9999	9999	9999	9999	9999	9999
9999	9999	9999	9999	9999	9999	9999	9999	9999	9999	9999	9999	9999	9999	9999	9999	9999	9999	9999	9999	9999	9999	9999	9999
9999	9999	9999	9999	9999	9999	9999	9999	9999	9999	9999	9999	9999	9999	9999	9999	9999	9999	9999	9999	9999	9999	9999	9999
9999	9999	9999	9999	9999	9999	9999	9999	9999	0.07	1.09	0.06	9999	9999	9999	0.14	0.17	0.01	9999	9999	9999	9999	9999	9999
9999	9999	9999	9999	9999	9999	9999	9999	9999	0.2	1.32	0.05	9999	9999	9999	0.08	0.08	0.02	9999	9999	9999	9999	9999	9999
9999	9999	9999	9999	9999	9999	9999	9999	9999	0.22	2.2	0.22	9999	9999	9999	0.17	0.1	0.04	9999	9999	9999	9999	9999	9999
9999	9999	9999	9999	9999	9999	9999	9999	9999	0.17	1.56	0.2	9999	9999	9999	0.14	0.11	0.06	9999	9999	9999	9999	9999	9999
9999	9999	9999	9999	9999	9999	9999	9999	9999	0.22	1.07	0.15	9999	9999	9999	0.05	0.06	0.02	9999	9999	9999	9999	9999	9999
9999	9999	9999	9999	9999	9999	9999	9999	9999	0.11	2.56	0.19	9999	9999	9999	0.09	0.05	0.02	9999	9999	9999	9999	9999	9999
9999	9999	9999	9999	9999	9999	9999	9999	9999	0.09	0.98	0.03	9999	9999	9999	0.03	0.05	0.02	9999	9999	9999	9999	9999	9999
9999	9999	9999	9999	9999	9999	9999	9999	9999	0.13	3.22	0.05	9999	9999	9999	0.13	0.03	0.01	9999	9999	9999	9999	9999	9999
9999	9999	9999	9999	9999	9999	9999	9999	9999	0.11	1.76	0.05	9999	9999	9999	0.16	0.04	0.02	9999	9999	9999	9999	9999	9999
9999	9999	9999	9999	9999	9999	9999	9999	9999	0.18	6.1	0.03	9999	9999	9999	0.11	0.05	0.01	9999	9999	9999	9999	9999	9999
9999	9999	9999	9999	9999	9999	9999	9999	9999	0.09	0.07	0.01	9999	9999	9999	0.25	0.04	0.02	9999	9999	9999	9999	9999	9999
9999	9999	9999	9999	9999	9999	9999	9999	9999	0.19	2.96	0.1	9999	9999	9999	0.05	0.09	0.02	9999	9999	9999	9999	9999	9999
9999	9999	9999	9999	9999	9999	9999	9999	9999	0.27	1.88	0.07	9999	9999	9999	0.08	0.08	0.01	9999	9999	9999	9999	9999	9999
9999	9999	9999	9999	9999	9999	9999	9999	9999	0.22	0.95	0.12	9999	9999	9999	0.17	0.05	0.04	9999	9999	9999	9999	9999	9999
9999	9999	9999	9999	9999	9999	9999	9999	9999	0.1	1.6	0.04	9999	9999	9999	0.12	0.06	0.01	9999	9999	9999	9999	9999	9999
9999	9999	9999	9999	9999	9999	9999	9999	9999	0.39	0.42	0.07	9999	9999	9999	0.01	0	0	9999	9999	9999	9999	9999	9999
9999	9999	9999	9999	9999	9999	9999	9999	9999	0.21	1.15	0.08	9999	9999	9999	0.05	0.05	0.03	9999	9999	9999	9999	9999	9999
9999	9999	9999	9999	9999	9999	9999	9999	9999	9999	9999	9999	9999	9999	9999	9999	9999	9999	9999	9999	9999	9999	9999	9999
9999	9999	9999	9999	9999	9999	9999	9999	9999	9999	9999	9999	9999	9999	9999	9999	9999	9999	9999	9999	9999	9999	9999	9999
9999	9999	9999	9999	9999	9999	9999	9999	9999	9999	9999	9999	9999	9999	9999	9999	9999	9999	9999	9999	9999	9999	9999	9999
9999	9999	9999	9999	9999	9999	9999	9999	9999	9999	9999	9999	9999	9999	9999	9999	9999	9999	9999	9999	9999	9999	9999	9999
9999	9999	9999	9999	9999	9999	9999	9999	9999	9999	9999	9999	9999	9999	9999	9999	9999	9999	9999	9999	9999	9999	9999	9999
9999	9999	9999	9999	9999	9999	9999	9999	9999	9999	9999	9999	9999	9999	9999	9999	9999	9999	9999	9999	9999	9999	9999	9999
9999	9999	9999	9999	9999	9999	9999	9999	9999	9999	9999	9999	9999	9999	9999	9999	9999	9999	9999	9999	9999	9999	9999	9999
9999	9999	9999	9999	9999	9999	9999	9999	9999	9999	9999	9999	9999	9999	9999	9999	9999	9999	9999	9999	9999	9999	9999	9999
9999	9999	9999	9999	9999	9999	9999	9999	9999	9999	9999	9999	9999	9999	9999	9999	9999	9999	9999	9999	9999	9999	9999	9999
9999	9999	9999	9999	9999	9999	9999	9999	9999	9999	9999	9999	9999	9999	9999	9999	9999	9999	9999	9999	9999	9999	9999	9999
9999	9999	9999	9999	9999	9999	9999	9999	9999	9999	9999	9999	9999	9999	9999	9999	9999	9999	9999	9999	9999	9999	9999	9999
9999	9999	9999	9999	9999	9999	9999	9999	9999	9999	9999	9999	9999	9999	9999	9999	9999	9999	9999	9999	9999	9999	9999	9999
9999	9999	9999	9999	9999	9999	9999	9999	9999	9999	9999	9999	9999	9999	9999	9999	9999	9999	9999	9999	9999	9999	9999	9999
9999	9999	9999	9999	9999	9999	9999	9999	9999	9999	9999	9999	9999	9999	9999	9999	9999	9999	9999	9999	9999	9999	9999	9999
9999	9999	9999	9999	9999	9999	9999	9999	9999	9999	9999	9999	9999	9999	9999	9999	9999	9999	9999	9999	9999	9999	9999	9999
9999	9999	9999	9999	9999	9999	9999	9999	9999	9999	9999	9999	9999	9999	9999	9999	9999	9999	9999	9999	9999	9999	9999	9999
9999	9999	9999	9999	9999	9999	9999	9999	9999	9999	9999	9999	9999	9999	9999	9999	9999	9999	9999	9999	9999	9999	9999	9999
9999	9999	9999	9999	9999	9999	9999	9999	9999	9999	9999	9999	9999	9999	9999	9999	9999	9999	9999	9999	9999	9999	9999	9999
9999	9999	9999	9999	9999	9999	9999	9999	9999	9999	9999	9999	9999	9999	9999	9999	9999	9999	9999	9999	9999	9999	9999	9999
9999	9999	9999	9999	9999	9999	9999	9999	9999	9999	9999	9999	9999	9999	9999	9999	9999	9999	9999	9999	9999	9999	9999	9999
9999	9999	9999	9999	9999	9999	9999	9999	9999	9999	9999	9999	9999	9999	9999	9999	9999	9999	9999	9999	9999	9999	9999	9999
9999	9999	9999	9999	9999	9999	9999	9999	9999	9999	9999	9999	9999	9999	9999	9999	9999	9999	9999	9999	9999	9999	9999	9999
9999	9999	9999	9999	9999	9999	9999	9999	9999	9999	9999	9999	9999	9999	9999	9999	9999	9999	9999	9999	9999	9999	9999	9999
9999	9999	9999	9999	9999	9999	9999	9999	9999	9999	9999	9999	9999	9999	9999	9999	9999	9999	9999	9999	9999	9999	9999	9999
9999	9999	9999	9999	9999	9999	9999	9999	9999	9999	9999	9999	9999	9999	9999	9999	9999	9999	9999	9999	9999	9999	9999	9999
9999	9999	9999	9999	9999	9999	9999	9999	9999	9999	9999	9999	9999	9999	9999	9999	9999	9999	9999	9999	9999	9999	9999	9999
9999	0.81	0.07	0.3	0.26	0.06	9999	9999	9999	9999	9999	9999	9999	9999	9999	9999	9999	9999	9999	9999	9999	9999	9999	9999
9999	0.6	0.07	0.36	0.47	0.05	9999	9999	9999	9999	9999	9999	9999	9999	9999	9999	9999	9999	9999	9999	9999	9999	9999	9999
9999	0.73	0.07	0.26	0.38	0.06	9999	9999	9999	9999	9999	9999	9999	9999	9999	9999	9999	9999	9999	9999	9999	9999	9999	9999
9999	0.87	0.07	0.38	0.33	0.06	9999	9999	9999	9999	9999	9999	9999	9999	9999	9999	9999	9999	9999	9999	9999	9999	9999	9999
9999	9999	9999	9999	9999	9999	9999	0.49	0.04	0.13	0.78	0.04	9999	0.09	0.01	0.05	0.07	0.01	9999	0.49	0.06	0.16	0.38	0.04
9999	9999	9999	9999	9999	9999	9999	9999	9999	9999	9999	9999	9999	9999	9999	9999	9999	9999	9999	9999	9999	9999	9999	9999
9999	9999	9999	9999	9999	9999	9999	9999	9999	9999	9999	9999	9999	9999	9999	9999	9999	9999	9999	9999	9999	9999	9999	9999
9999	9999	9999	9999	9999	9999	9999	9999	9999	9999	9999	9999	9999	9999	9999	9999	9999	9999	9999	9999	9999	9999	9999	9999
9999	9999	9999	9999	9999	9999	9999	9999	9999	9999	9999	9999	9999	9999	9999	9999	9999	9999	9999	9999	9999	9999	9999	9999
9999	9999	9999	9999	9999	9999	9999	9999	9999	9999	9999	9999	9999	9999	9999	9999	9999	9999	9999	9999	9999	9999	9999	9999
9999	9999	9999	9999	9999	9999	9999	9999	9999	9999	9999	9999	9999	9999	9999	9999	9999	9999	9999	9999	9999	9999	9999	9999
9999	9999	9999	9999	9999	9999	9999	9999	9999	9999	9999	9999	9999	9999	9999	9999	9999	9999	9999	9999	9999	9999	9999	9999
9999	9999	9999	9999	9999	9999	9999	9999	9999	9999	9999	9999	9999	9999	9999	9999	9999	9999	9999	9999	9999	9999	9999	9999
9999	9999	9999	9999	9999	9999	9999	9999	9999	9999	9999	9999	9999	9999	9999	9999	9999	9999	9999	9999	9999	9999	9999	9999
9999	9999	9999	9999	9999	9999	9999	9999	9999	9999	9999	9999	9999	9999	9999	9999	9999	9999	9999	9999	9999	9999	9999	9999
9999	9999	9999	9999	9999	9999	9999	9999	9999	9999	9999	9999	9999	9999	9999	9999	9999	9999	9999	9999	9999	9999	9999	9999
9999	9999	9999	9999	9999	9999	9999	9999	9999	9999	9999	9999	9999	9999	9999	9999	9999	9999	9999	9999	9999	9999	9999	9999
9999	9999	9999	9999	9999	9999	9999	9999	9999	9999	9999	9999	9999	9999	9999	9999	9999	9999	9999	9999	9999	9999	9999	9999
9999	9999	9999	9999	9999	9999	9999	9999	9999	9999	9999	9999	9999	9999	9999	9999	9999	9999	9999	9999	9999	9999	9999	9999
9999	9999	9999	9999	9999	9999	9999	9999	9999	9999	9999	9999	9999	9999	9999	9999	9999	9999	9999	9999	9999	9999	9999	9999
9999	9999	9999	9999	9999	9999	9999	9999	9999	9999	9999	9999	9999	9999	9999	9999	9999	9999	9999	9999	9999	9999	9999	9999
9999	9999	9999	9999	9999	9999	9999	9999	9999	9999	9999	9999	9999	9999	9999	9999	9999	9999	9999	9999	9999	9999	9999	9999
9999	9999	9999	9999	9999	9999	9999	9999	9999	9999	9999	9999	9999	9999	9999	9999	9999	9999	9999	9999	9999	9999	9999	9999
9999	9999	9999	9999	9999	9999	9999	9999	9999	9999	9999	9999	9999	9999	9999	9999	9999	9999	9999	9999	9999	9999	9999	9999
9999	9999	9999	9999	9999	9999	9999	9999	9999	9999	9999	9999	9999	9999	9999	9999	9999	9999	9999	9999	9999	9999	9999	9999
9999	9999	9999	9999	9999	9999	9999	9999	9999	9999	9999	9999	9999	9999	9999	9999	9999	9999	9999	9999	9999	9999	9999	9999
9999	9999	9999	9999	9999	9999	9999	9999	9999	9999	9999	9999	9999	9999	9999	9999	9999	9999	9999	9999	9999	9999	9999	9999
9999	9999	9999	9999	9999	9999	9999	9999	9999	9999	9999	9999	9999	9999	9999	9999	9999	9999	9999	9999	9999	9999	9999	9999
9999	9999	9999	9999	9999	9999	9999	9999	9999	9999	9999	9999	9999	9999	9999	9999	9999	9999	9999	9999	9999	9999	9999	9999
9999	9999	9999	9999	9999	9999	9999	9999	9999	9999	9999	9999	9999	9999	9999	9999	9999	9999	9999	9999	9999	9999	9999	9999
9999	9999	9999	9999	9999	9999	9999	9999	9999	9999	9999	9999	9999	9999	9999	9999	9999	9999	9999	9999	9999	9999	9999	9999
9999	9999	9999	9999	9999	9999	9999	9999	9999	9999	9999	9999	9999	9999	9999	9999	9999	9999	9999	9999	9999	9999	9999	9999
9999	9999	9999	9999	9999	9999	9999	9999	9999	9999	9999	9999	9999	9999	9999	9999	9999	9999	9999	9999	9999	9999	9999	9999
9999	9999	9999	9999	9999	9999	9999	9999	9999	9999	9999	9999	9999	9999	9999	9999	9999	9999	9999	9999	9999	9999	9999	9999
9999	9999	9999	9999	9999	9999	9999	9999	9999	9999	9999	9999	9999	9999	9999	9999	9999	9999	9999	9999	9999	9999	9999	9999
9999	9999	9999	9999	9999	9999	9999	9999	9999	9999	9999	9999	9999	9999	9999	9999	9999	9999	9999	9999	9999	9999	9999	9999
9999	9999	9999	9999	9999	9999	9999	0.286	0.046	0.289	1.169	0.11	9999	0.063	0.006	0.096	0.132	0.028	9999	0.337	0.054	0.318	0.871	0.132
9999	9999	9999	9999	9999	9999	9999	0.302	0.024	0.136	1.188	0.052	9999	0.08	0.006	0.061	0.119	0.028	9999	0.241	0.035	0.148	0.624	0.057
9999	9999	9999	9999	9999	9999	9999	0.394	0.03	0.43	2.478	0.064	9999	0.087	0.007	0.096	0.232	0.039	9999	0.187	0.02	0.183	0.634	0.042
9999	9999	9999	9999	9999	9999	9999	0.375	0.043	0.227	0.938	0.054	9999	0.083	0.009	0.13	0.167	0.032	9999	0.215	0.03	0.185	0.433	0.044
9999	9999	9999	9999	9999	9999	9999	0.608	0.035	0.23	2.31	0.08	9999	0.12	0.016	0.206	0.196	0.041	9999	0.256	0.027	0.114	0.69	0.053
9999	9999	9999	9999	9999	9999	9999	0.331	0.018	0.165	2.334	0.044	9999	0.107	0.004	0.128	0.067	0.007	9999	0.301	0.053	0.256	0.943	0.062
9999	9999	9999	9999	9999	9999	9999	9999	9999	9999	9999	9999	9999	9999	9999	9999	9999	9999	9999	9999	9999	9999	9999	9999
9999	9999	9999	9999	9999	9999	9999	9999	9999	9999	9999	9999	9999	9999	9999	9999	9999	9999	9999	9999	9999	9999	9999	9999
9999	9999	9999	9999	9999	9999	9999	9999	9999	9999	9999	9999	9999	9999	9999	9999	9999	9999	9999	9999	9999	9999	9999	9999
9999	9999	9999	9999	9999	9999	9999	9999	9999	9999	9999	9999	9999	9999	9999	9999	9999	9999	9999	9999	9999	9999	9999	9999
9999	9999	9999	9999	9999	9999	9999	9999	9999	9999	9999	9999	9999	9999	9999	9999	9999	9999	9999	9999	9999	9999	9999	9999
9999	9999	9999	9999	9999	9999	9999	9999	9999	9999	9999	9999	9999	9999	9999	9999	9999	9999	9999	9999	9999	9999	9999	9999
9999	9999	9999	9999	9999	9999	9999	9999	9999	9999	9999	9999	9999	9999	9999	9999	9999	9999	9999	9999	9999	9999	9999	9999
9999	9999	9999	9999	9999	9999	9999	9999	9999	9999	9999	9999	9999	9999	9999	9999	9999	9999	9999	9999	9999	9999	9999	9999
9999	9999	9999	9999	9999	9999	9999	9999	9999	9999	9999	9999	9999	9999	9999	9999	9999	9999	9999	9999	9999	9999	9999	9999
9999	9999	9999	9999	9999	9999	9999	9999	9999	9999	9999	9999	9999	9999	9999	9999	9999	9999	9999	9999	9999	9999	9999	9999
9999	9999	9999	9999	9999	9999	9999	9999	9999	9999	9999	9999	9999	9999	9999	9999	9999	9999	9999	9999	9999	9999	9999	9999
9999	9999	9999	9999	9999	9999	9999	9999	9999	9999	9999	9999	9999	9999	9999	9999	9999	9999	9999	9999	9999	9999	9999	9999
9999	9999	9999	9999	9999	9999	9999	9999	9999	9999	9999	9999	9999	9999	9999	9999	9999	9999	9999	9999	9999	9999	9999	9999
9999	9999	9999	9999	9999	9999	9999	9999	9999	9999	9999	9999	9999	9999	9999	9999	9999	9999	9999	9999	9999	9999	9999	9999
9999	9999	9999	9999	9999	9999	9999	9999	9999	9999	9999	9999	9999	9999	9999	9999	9999	9999	9999	9999	9999	9999	9999	9999
9999	9999	9999	9999	9999	9999	9999	9999	9999	9999	9999	9999	9999	9999	9999	9999	9999	9999	9999	9999	9999	9999	9999	9999
9999	9999	9999	9999	9999	9999	9999	9999	9999	9999	9999	9999	9999	9999	9999	9999	9999	9999	9999	9999	9999	9999	9999	9999
9999	9999	9999	9999	9999	9999	9999	9999	9999	9999	9999	9999	9999	9999	9999	9999	9999	9999	9999	9999	9999	9999	9999	9999
9999	9999	9999	9999	9999	9999	9999	9999	9999	9999	9999	9999	9999	9999	9999	9999	9999	9999	9999	9999	9999	9999	9999	9999
9999	9999	9999	9999	9999	9999	9999	9999	9999	9999	9999	9999	9999	9999	9999	9999	9999	9999	9999	9999	9999	9999	9999	9999
9999	9999	9999	9999	9999	9999	9999	9999	9999	9999	9999	9999	9999	9999	9999	9999	9999	9999	9999	9999	9999	9999	9999	9999
9999	9999	9999	9999	9999	9999	9999	9999	9999	9999	9999	9999	9999	9999	9999	9999	9999	9999	9999	9999	9999	9999	9999	9999
9999	9999	9999	9999	9999	9999	9999	9999	9999	9999	9999	9999	9999	9999	9999	9999	9999	9999	9999	9999	9999	9999	9999	9999
9999	9999	9999	9999	9999	9999	9999	9999	9999	9999	9999	9999	9999	9999	9999	9999	9999	9999	9999	9999	9999	9999	9999	9999
9999	9999	9999	9999	9999	9999	9999	9999	9999	9999	9999	9999	9999	9999	9999	9999	9999	9999	9999	9999	9999	9999	9999	9999
9999	9999	9999	9999	9999	9999	9999	9999	9999	9999	9999	9999	9999	9999	9999	9999	9999	9999	9999	9999	9999	9999	9999	9999
9999	9999	9999	9999	9999	9999	9999	9999	9999	9999	9999	9999	9999	9999	9999	9999	9999	9999	9999	9999	9999	9999	9999	9999
9999	9999	9999	9999	9999	9999	9999	9999	9999	9999	9999	9999	9999	9999	9999	9999	9999	9999	9999	9999	9999	9999	9999	9999
9999	9999	9999	9999	9999	9999	9999	9999	9999	9999	9999	9999	9999	9999	9999	9999	9999	9999	9999	9999	9999	9999	9999	9999
9999	9999	9999	9999	9999	9999	9999	9999	9999	9999	9999	9999	9999	9999	9999	9999	9999	9999	9999	9999	9999	9999	9999	9999
9999	9999	9999	9999	9999	9999	9999	9999	9999	9999	9999	9999	9999	9999	9999	9999	9999	9999	9999	9999	9999	9999	9999	9999
9999	9999	9999	9999	9999	9999	9999	9999	9999	9999	9999	9999	9999	9999	9999	9999	9999	9999	9999	9999	9999	9999	9999	9999
9999	9999	9999	9999	9999	9999	9999	9999	9999	9999	9999	9999	9999	9999	9999	9999	9999	9999	9999	9999	9999	9999	9999	9999
9999	9999	9999	9999	9999	9999	9999	9999	9999	9999	9999	9999	9999	9999	9999	9999	9999	9999	9999	9999	9999	9999	9999	9999
9999	9999	9999	9999	9999	9999	9999	9999	9999	9999	9999	9999	9999	9999	9999	9999	9999	9999	9999	9999	9999	9999	9999	9999
9999	9999	9999	9999	9999	9999	9999	9999	9999	9999	9999	9999	9999	9999	9999	9999	9999	9999	9999	9999	9999	9999	9999	9999
9999	9999	9999	9999	9999	9999	9999	9999	9999	9999	9999	9999	9999	9999	9999	9999	9999	9999	9999	9999	9999	9999	9999	9999
9999	9999	9999	9999	9999	9999	9999	9999	9999	9999	9999	9999	9999	9999	9999	9999	9999	9999	9999	9999	9999	9999	9999	9999
9999	9999	9999	9999	9999	9999	9999	9999	9999	9999	9999	9999	9999	9999	9999	9999	9999	9999	9999	9999	9999	9999	9999	9999
9999	9999	9999	9999	9999	9999	9999	9999	9999	9999	9999	9999	9999	9999	9999	9999	9999	9999	9999	9999	9999	9999	9999	9999
9999	9999	9999	9999	9999	9999	9999	9999	9999	9999	9999	9999	9999	9999	9999	9999	9999	9999	9999	9999	9999	9999	9999	9999
9999	9999	9999	9999	9999	9999	9999	9999	9999	9999	9999	9999	9999	9999	9999	9999	9999	9999	9999	9999	9999	9999	9999	9999
9999	9999	9999	9999	9999	9999	9999	9999	9999	9999	9999	9999	9999	9999	9999	9999	9999	9999	9999	9999	9999	9999	9999	9999
9999	9999	9999	9999	9999	9999	9999	9999	9999	9999	9999	9999	9999	9999	9999	9999	9999	9999	9999	9999	9999	9999	9999	9999
9999	9999	9999	9999	9999	9999	9999	9999	9999	9999	9999	9999	9999	9999	9999	9999	9999	9999	9999	9999	9999	9999	9999	9999
9999	9999	9999	9999	9999	9999	9999	9999	9999	9999	9999	9999	9999	9999	9999	9999	9999	9999	9999	9999	9999	9999	9999	9999
9999	9999	9999	9999	9999	9999	9999	9999	9999	9999	9999	9999	9999	9999	9999	9999	9999	9999	9999	9999	9999	9999	9999	9999
9999	9999	9999	9999	9999	9999	9999	9999	9999	9999	9999	9999	9999	9999	9999	9999	9999	9999	9999	9999	9999	9999	9999	9999
9999	9999	9999	9999	9999	9999	9999	9999	9999	9999	9999	9999	9999	9999	9999	9999	9999	9999	9999	9999	9999	9999	9999	9999
9999	9999	9999	9999	9999	9999	9999	9999	9999	9999	9999	9999	9999	9999	9999	9999	9999	9999	9999	9999	9999	9999	9999	9999
9999	9999	9999	9999	9999	9999	9999	9999	9999	9999	9999	9999	9999	9999	9999	9999	9999	9999	9999	9999	9999	9999	9999	9999
9999	9999	9999	9999	9999	9999	9999	9999	9999	9999	9999	9999	9999	9999	9999	9999	9999	9999	9999	9999	9999	9999	9999	9999
9999	9999	9999	9999	9999	9999	9999	9999	9999	9999	9999	9999	9999	9999	9999	9999	9999	9999	9999	9999	9999	9999	9999	9999
9999	9999	9999	9999	9999	9999	9999	9999	9999	9999	9999	9999	9999	9999	9999	9999	9999	9999	9999	9999	9999	9999	9999	9999
9999	9999	9999	9999	9999	9999	9999	9999	9999	9999	9999	9999	9999	9999	9999	9999	9999	9999	9999	9999	9999	9999	9999	9999
9999	9999	9999	9999	9999	9999	9999	9999	9999	9999	9999	9999	9999	9999	9999	9999	9999	9999	9999	9999	9999	9999	9999	9999
9999	9999	9999	9999	9999	9999	9999	9999	9999	9999	9999	9999	9999	9999	9999	9999	9999	9999	9999	9999	9999	9999	9999	9999
9999	9999	9999	9999	9999	9999	9999	9999	9999	9999	9999	9999	9999	9999	9999	9999	9999	9999	9999	9999	9999	9999	9999	9999
9999	9999	9999	9999	9999	9999	9999	9999	9999	9999	9999	9999	9999	9999	9999	9999	9999	9999	9999	9999	9999	9999	9999	9999
9999	9999	9999	9999	9999	9999	9999	9999	9999	9999	9999	9999	9999	9999	9999	9999	9999	9999	9999	9999	9999	9999	9999	9999
9999	9999	9999	9999	9999	9999	9999	9999	9999	9999	9999	9999	9999	9999	9999	9999	9999	9999	9999	9999	9999	9999	9999	9999
9999	9999	9999	9999	9999	9999	9999	9999	9999	9999	9999	9999	9999	9999	9999	9999	9999	9999	9999	9999	9999	9999	9999	9999
9999	9999	9999	9999	9999	9999	9999	0.245	0.033	0.079	0.788	0.046	9999	0.067	0.005	0.021	0.162	0.022	9999	0.312	0.028	0.084	0.63	0.061
9999	9999	9999	9999	9999	9999	9999	0.261	0.029	0.081	1.025	0.041	9999	0.075	0.006	0.019	0.14	0.035	9999	0.418	0.041	0.115	1.107	0.11
9999	9999	9999	9999	9999	9999	9999	0.294	0.046	0.074	0.984	0.037	9999	0.071	0.005	0.016	0.143	0.049	9999	0.379	0.041	0.095	1.186	0.108
9999	9999	9999	9999	9999	9999	9999	0.241	0.032	0.072	1.163	0.032	9999	0.062	0.004	0.017	0.175	0.026	9999	0.332	0.032	0.083	0.773	0.07
9999	9999	9999	9999	9999	9999	9999	0.288	0.046	0.065	1.227	0.028	9999	0.077	0.005	0.025	0.171	0.03	9999	0.429	0.048	0.095	0.926	0.061
9999	9999	9999	9999	9999	9999	9999	0.272	0.045	0.079	1.27	0.045	9999	0.076	0.005	0.022	0.151	0.056	9999	0.49	0.038	0.085	0.811	0.047
9999	9999	9999	9999	9999	9999	9999	9999	9999	9999	9999	9999	9999	9999	9999	9999	9999	9999	9999	9999	9999	9999	9999	9999
9999	9999	9999	9999	9999	9999	9999	9999	9999	9999	9999	9999	9999	9999	9999	9999	9999	9999	9999	9999	9999	9999	9999	9999
9999	9999	9999	9999	9999	9999	9999	9999	9999	9999	9999	9999	9999	9999	9999	9999	9999	9999	9999	9999	9999	9999	9999	9999
9999	9999	9999	9999	9999	9999	9999	9999	9999	9999	9999	9999	9999	9999	9999	9999	9999	9999	9999	9999	9999	9999	9999	9999
9999	9999	9999	9999	9999	9999	9999	9999	9999	9999	9999	9999	9999	9999	9999	9999	9999	9999	9999	9999	9999	9999	9999	9999
9999	9999	9999	9999	9999	9999	9999	9999	9999	9999	9999	9999	9999	9999	9999	9999	9999	9999	9999	9999	9999	9999	9999	9999
9999	9999	9999	9999	9999	9999	9999	9999	9999	9999	9999	9999	9999	9999	9999	9999	9999	9999	9999	9999	9999	9999	9999	9999
9999	9999	9999	9999	9999	9999	9999	9999	9999	9999	9999	9999	9999	9999	9999	9999	9999	9999	9999	9999	9999	9999	9999	9999
9999	9999	9999	9999	9999	9999	9999	9999	9999	9999	9999	9999	9999	9999	9999	9999	9999	9999	9999	9999	9999	9999	9999	9999
9999	9999	9999	9999	9999	9999	9999	9999	9999	9999	9999	9999	9999	9999	9999	9999	9999	9999	9999	9999	9999	9999	9999	9999
9999	0.154	9999	9999	0.1195	9999	9999	9999	9999	9999	9999	9999	9999	9999	9999	9999	9999	9999	9999	0.17	9999	9999	0.248	9999
9999	0.134	9999	9999	0.1915	9999	9999	9999	9999	9999	9999	9999	9999	9999	9999	9999	9999	9999	9999	0.222	9999	9999	0.2717	9999
9999	0.12	9999	9999	0.1071	9999	9999	9999	9999	9999	9999	9999	9999	9999	9999	9999	9999	9999	9999	0.185	9999	9999	0.1042	9999
9999	0.101	9999	9999	0.1555	9999	9999	9999	9999	9999	9999	9999	9999	9999	9999	9999	9999	9999	9999	0.178	9999	9999	0.2151	9999
9999	9999	9999	9999	9999	9999	9999	9999	9999	9999	9999	9999	9999	9999	9999	9999	9999	9999	9999	9999	9999	9999	9999	9999
9999	9999	9999	9999	9999	9999	9999	9999	9999	9999	9999	9999	9999	9999	9999	9999	9999	9999	9999	9999	9999	9999	9999	9999
9999	9999	9999	9999	9999	9999	9999	9999	9999	9999	9999	9999	9999	9999	9999	9999	9999	9999	9999	9999	9999	9999	9999	9999
9999	9999	9999	9999	9999	9999	9999	9999	9999	9999	9999	9999	9999	9999	9999	9999	9999	9999	9999	9999	9999	9999	9999	9999
9999	9999	9999	9999	9999	9999	9999	9999	9999	9999	9999	9999	9999	9999	9999	9999	9999	9999	9999	9999	9999	9999	9999	9999
9999	9999	9999	9999	9999	9999	9999	9999	9999	9999	9999	9999	9999	9999	9999	9999	9999	9999	9999	9999	9999	9999	9999	9999
9999	9999	9999	9999	9999	9999	9999	9999	9999	9999	9999	9999	9999	9999	9999	9999	9999	9999	9999	9999	9999	9999	9999	9999
9999	9999	9999	9999	9999	9999	9999	9999	9999	9999	9999	9999	9999	9999	9999	9999	9999	9999	9999	9999	9999	9999	9999	9999
9999	9999	9999	9999	9999	9999	9999	9999	9999	9999	9999	9999	9999	9999	9999	9999	9999	9999	9999	9999	9999	9999	9999	9999
9999	9999	9999	9999	9999	9999	9999	9999	9999	9999	9999	9999	9999	9999	9999	9999	9999	9999	9999	9999	9999	9999	9999	9999
9999	9999	9999	9999	9999	9999	9999	9999	9999	9999	9999	9999	9999	9999	9999	9999	9999	9999	9999	9999	9999	9999	9999	9999
9999	9999	9999	9999	9999	9999	9999	9999	9999	9999	9999	9999	9999	9999	9999	9999	9999	9999	9999	9999	9999	9999	9999	9999
9999	9999	9999	9999	9999	9999	9999	9999	9999	9999	9999	9999	9999	9999	9999	9999	9999	9999	9999	9999	9999	9999	9999	9999
9999	9999	9999	9999	9999	9999	9999	9999	9999	9999	9999	9999	9999	9999	9999	9999	9999	9999	9999	9999	9999	9999	9999	9999
9999	9999	9999	9999	9999	9999	9999	9999	9999	9999	9999	9999	9999	9999	9999	9999	9999	9999	9999	9999	9999	9999	9999	9999
9999	9999	9999	9999	9999	9999	9999	9999	9999	9999	9999	9999	9999	9999	9999	9999	9999	9999	9999	9999	9999	9999	9999	9999
9999	9999	9999	9999	9999	9999	9999	9999	9999	9999	9999	9999	9999	9999	9999	9999	9999	9999	9999	9999	9999	9999	9999	9999
9999	9999	9999	9999	9999	9999	9999	9999	9999	9999	9999	9999	9999	9999	9999	9999	9999	9999	9999	9999	9999	9999	9999	9999
9999	0.24	0.027	0.19	0.2	0.033	9999	9999	9999	9999	9999	9999	9999	9999	9999	9999	9999	9999	9999	9999	9999	9999	9999	9999
9999	9999	9999	9999	9999	9999	9999	9999	9999	9999	9999	9999	9999	9999	9999	9999	9999	9999	9999	9999	9999	9999	9999	9999
9999	0.38	0.041	0.22	0.41	0.056	9999	9999	9999	9999	9999	9999	9999	9999	9999	9999	9999	9999	9999	9999	9999	9999	9999	9999
9999	0.31	0.034	0.15	0.38	0.033	9999	9999	9999	9999	9999	9999	9999	9999	9999	9999	9999	9999	9999	9999	9999	9999	9999	9999
9999	0.32	0.038	0.21	1.06	0.056	9999	9999	9999	9999	9999	9999	9999	9999	9999	9999	9999	9999	9999	9999	9999	9999	9999	9999
9999	9999	9999	9999	9999	9999	9999	9999	9999	9999	9999	9999	9999	9999	9999	9999	9999	9999	9999	9999	9999	9999	9999	9999
9999	9999	9999	9999	9999	9999	9999	9999	9999	9999	9999	9999	9999	9999	9999	9999	9999	9999	9999	9999	9999	9999	9999	9999
9999	9999	9999	9999	9999	9999	9999	9999	9999	9999	9999	9999	9999	9999	9999	9999	9999	9999	9999	9999	9999	9999	9999	9999
9999	9999	9999	9999	9999	9999	9999	9999	9999	9999	9999	9999	9999	9999	9999	9999	9999	9999	9999	9999	9999	9999	9999	9999
9999	9999	9999	9999	9999	9999	9999	9999	9999	9999	9999	9999	9999	9999	9999	9999	9999	9999	9999	9999	9999	9999	9999	9999
9999	9999	9999	9999	9999	9999	9999	9999	9999	9999	9999	9999	9999	9999	9999	9999	9999	9999	9999	9999	9999	9999	9999	9999
9999	9999	9999	9999	9999	9999	9999	9999	9999	9999	9999	9999	9999	9999	9999	9999	9999	9999	9999	9999	9999	9999	9999	9999
9999	9999	9999	9999	9999	9999	9999	9999	9999	9999	9999	9999	9999	9999	9999	9999	9999	9999	9999	9999	9999	9999	9999	9999
9999	9999	9999	9999	9999	9999	9999	9999	9999	9999	9999	9999	9999	9999	9999	9999	9999	9999	9999	9999	9999	9999	9999	9999
9999	9999	9999	9999	9999	9999	9999	9999	9999	9999	9999	9999	9999	9999	9999	9999	9999	9999	9999	9999	9999	9999	9999	9999
9999	9999	9999	9999	9999	9999	9999	0.299	0.029	0.163	0.868	0.049	9999	0.053	0.004	0.043	0.081	0.013	9999	0.246	0.041	0.178	0.414	0.043
9999	9999	9999	9999	9999	9999	9999	0.235	0.022	0.138	1.198	0.048	9999	0.041	0.002	0.026	0.088	0.011	9999	0.219	0.023	0.096	0.434	0.031
9999	9999	9999	9999	9999	9999	9999	0.206	0.026	0.143	0.877	0.058	9999	0.048	0.002	0.044	0.089	0.018	9999	0.218	0.026	0.109	0.351	0.044
9999	9999	9999	9999	9999	9999	9999	0.368	0.045	0.226	1.488	0.056	9999	0.059	0.004	0.032	0.093	0.007	9999	0.321	0.046	0.186	0.692	0.045
9999	9999	9999	9999	9999	9999	9999	0.418	0.062	0.271	0.99	0.063	9999	0.076	0.006	0.039	0.075	0.011	9999	0.291	0.038	0.157	0.448	0.038
9999	9999	9999	9999	9999	9999	9999	0.327	0.044	0.242	0.895	0.056	9999	0.066	0.004	0.06	0.076	0.015	9999	0.312	0.037	0.207	0.4	0.042
9999	9999	9999	9999	9999	9999	9999	0.342	0.038	0.183	0.741	0.042	9999	0.06	0.004	0.065	0.083	0.017	9999	0.297	0.057	0.243	0.459	0.042
9999	9999	9999	9999	9999	9999	9999	0.326	0.04	0.179	0.659	0.047	9999	0.066	0.003	0.106	0.085	0.019	9999	0.364	0.056	0.208	0.392	0.049
9999	9999	9999	9999	9999	9999	9999	0.272	0.034	0.165	0.904	0.042	9999	0.053	0.003	0.086	0.109	0.02	9999	0.263	0.046	0.166	0.443	0.035
9999	9999	9999	9999	9999	9999	9999	0.388	0.044	0.223	0.594	0.046	9999	0.087	0.005	0.074	0.053	0.016	9999	0.294	0.051	0.22	0.315	0.048
9999	9999	9999	9999	9999	9999	9999	0.393	0.058	0.339	0.701	0.057	9999	0.068	0.006	0.062	0.066	0.016	9999	0.29	0.038	0.222	0.278	0.036
9999	9999	9999	9999	9999	9999	9999	0.306	0.044	0.251	0.703	0.052	9999	0.058	0.002	0.061	0.059	0.018	9999	0.227	0.03	0.184	0.263	0.038
9999	9999	9999	9999	9999	9999	9999	0.254	0.03	0.216	0.991	0.046	9999	0.051	0.002	0.064	0.086	0.02	9999	0.299	0.03	0.196	0.434	0.04
9999	9999	9999	9999	9999	9999	9999	0.181	0.022	0.1	0.457	0.043	9999	0.046	0.003	0.023	0.058	0.012	9999	0.24	0.026	0.105	0.246	0.036
9999	9999	9999	9999	9999	9999	9999	0.187	0.017	0.103	0.618	0.037	9999	0.045	0.002	0.022	0.061	0.012	9999	0.208	0.024	0.089	0.28	0.031
9999	9999	9999	9999	9999	9999	9999	9999	9999	9999	9999	9999	9999	9999	9999	9999	9999	9999	9999	9999	9999	9999	9999	9999
9999	9999	9999	9999	9999	9999	9999	0.416	0.049	0.33	1.287	0.082	9999	0.068	0.008	0.068	0.102	0.015	9999	0.463	0.079	0.354	1.081	0.108
9999	9999	9999	9999	9999	9999	9999	0.346	0.041	0.27	0.999	0.056	9999	0.087	0.008	0.081	0.109	0.02	9999	0.295	0.05	0.288	0.611	0.058
9999	9999	9999	9999	9999	9999	9999	0.332	0.035	0.266	1.086	0.099	9999	0.088	0.005	0.115	0.106	0.029	9999	0.401	0.054	0.362	0.565	0.093
9999	9999	9999	9999	9999	9999	9999	0.371	0.025	0.139	0.785	0.036	9999	0.082	0.009	0.053	0.066	0.015	9999	0.301	0.041	0.17	0.381	0.036
9999	9999	9999	9999	9999	9999	9999	0.335	0.033	0.183	1.046	0.038	9999	0.086	0.007	0.059	0.091	0.021	9999	0.296	0.042	0.201	0.521	0.042
9999	9999	9999	9999	9999	9999	9999	0.356	0.028	0.139	0.83	0.042	9999	0.087	0.005	0.088	0.081	0.015	9999	0.331	0.044	0.198	0.431	0.039
9999	9999	9999	9999	9999	9999	9999	0.523	0.035	0.256	1.031	0.052	9999	0.092	0.009	0.073	0.071	0.017	9999	0.408	0.038	0.236	0.459	0.038
9999	9999	9999	9999	9999	9999	9999	0.452	0.038	0.235	1.053	0.042	9999	0.107	0.008	0.1	0.103	0.019	9999	0.328	0.042	0.252	0.51	0.036
9999	9999	9999	9999	9999	9999	9999	0.417	0.03	0.137	0.897	0.035	9999	0.091	0.005	0.158	0.119	0.021	9999	0.349	0.045	0.242	0.47	0.035
9999	9999	9999	9999	9999	9999	9999	9999	9999	0.11	0.65	0.04	9999	9999	9999	0.06	0.03	0.01	9999	9999	9999	9999	9999	9999
9999	9999	9999	9999	9999	9999	9999	0.314	0.045	0.056	0.075	0.043	9999	0.1	0.008	0.017	0.078	0.012	9999	0.343	0.039	0.063	0.436	0.049
9999	9999	9999	9999	9999	9999	9999	0.325	0.049	0.067	0.112	0.041	9999	0.1	0.008	0.014	0.067	0.009	9999	0.319	0.035	0.061	0.49	0.028
9999	9999	9999	9999	9999	9999	9999	0.318	0.048	0.067	0.102	0.04	9999	0.093	0.008	0.017	0.062	0.01	9999	0.308	0.036	0.057	0.444	0.027
9999	0.14	9999	0.31	9999	9999	9999	9999	9999	9999	9999	9999	9999	9999	9999	9999	9999	9999	9999	0.41	9999	0.51	9999	9999
9999	9999	9999	9999	9999	9999	9999	0.15	0.03	0.13	0.4	0.04	9999	9999	9999	9999	9999	9999	9999	9999	9999	9999	9999	9999
9999	9999	9999	9999	9999	9999	9999	0.28	0.06	0.23	0.53	0.06	9999	9999	9999	9999	9999	9999	9999	9999	9999	9999	9999	9999
9999	9999	9999	9999	9999	9999	9999	0.24	0.05	0.12	0.83	0.04	9999	9999	9999	9999	9999	9999	9999	9999	9999	9999	9999	9999
9999	9999	9999	9999	9999	9999	9999	0.37	0.04	0.13	0.35	0.06	9999	9999	9999	9999	9999	9999	9999	9999	9999	9999	9999	9999
9999	9999	9999	9999	9999	9999	9999	0.28	0.02	0.08	2.45	0.07	9999	9999	9999	9999	9999	9999	9999	9999	9999	9999	9999	9999
9999	9999	9999	9999	9999	9999	9999	0.53	0.04	0.1	1.04	0.04	9999	9999	9999	9999	9999	9999	9999	9999	9999	9999	9999	9999
9999	9999	9999	9999	9999	9999	9999	0.51	0.06	0.2	1.23	0.04	9999	9999	9999	9999	9999	9999	9999	9999	9999	9999	9999	9999
9999	9999	9999	9999	9999	9999	9999	0.34	0.03	0.29	1.33	0.08	9999	9999	9999	9999	9999	9999	9999	9999	9999	9999	9999	9999
9999	9999	9999	9999	9999	9999	9999	9999	9999	9999	9999	9999	9999	9999	9999	9999	9999	9999	9999	9999	9999	9999	9999	9999
9999	9999	9999	9999	9999	9999	9999	9999	9999	9999	9999	9999	9999	9999	9999	9999	9999	9999	9999	9999	9999	9999	9999	9999
9999	9999	9999	9999	9999	9999	9999	9999	9999	9999	9999	9999	9999	9999	0.0089	0.0828	0.1994	0.027	9999	9999	9999	9999	9999	9999
9999	9999	9999	9999	9999	9999	9999	9999	9999	9999	9999	9999	9999	9999	0.0084	0.0933	0.135	0.0236	9999	9999	9999	9999	9999	9999
9999	9999	9999	9999	9999	9999	9999	9999	9999	9999	9999	9999	9999	9999	0.007	0.069	0.1097	0.0137	9999	9999	9999	9999	9999	9999
9999	9999	9999	9999	9999	9999	9999	9999	9999	9999	9999	9999	9999	9999	0.0052	0.0331	0.0323	0.0087	9999	9999	9999	9999	9999	9999
9999	9999	9999	9999	9999	9999	9999	9999	9999	9999	9999	9999	9999	9999	0.0032	0.0371	0.0267	0.0067	9999	9999	9999	9999	9999	9999
9999	9999	9999	9999	9999	9999	9999	9999	9999	9999	9999	9999	9999	9999	0.0032	0.041	0.0285	0.0082	9999	9999	9999	9999	9999	9999
9999	0.472	0.111	0.301	0.31	0.066	9999	9999	9999	9999	9999	9999	9999	9999	9999	9999	9999	9999	9999	0.564	0.12	0.323	0.559	0.089
9999	9999	9999	9999	9999	9999	9999	9999	9999	9999	9999	9999	9999	9999	9999	9999	9999	9999	9999	9999	9999	9999	9999	9999
9999	9999	9999	9999	9999	9999	9999	9999	9999	9999	9999	9999	9999	9999	9999	9999	9999	9999	9999	9999	9999	9999	9999	9999
9999	9999	9999	9999	9999	9999	9999	9999	9999	9999	9999	9999	9999	9999	9999	9999	9999	9999	9999	9999	9999	9999	9999	9999
9999	9999	9999	9999	9999	9999	9999	9999	9999	9999	9999	9999	9999	9999	9999	9999	9999	9999	9999	9999	9999	9999	9999	9999
9999	9999	9999	9999	9999	9999	9999	9999	9999	9999	9999	9999	9999	9999	9999	9999	9999	9999	9999	9999	9999	9999	9999	9999
9999	9999	9999	9999	9999	9999	9999	9999	9999	9999	9999	9999	9999	9999	9999	9999	9999	9999	9999	9999	9999	9999	9999	9999
9999	9999	9999	9999	9999	9999	9999	9999	9999	9999	9999	9999	9999	9999	9999	9999	9999	9999	9999	9999	9999	9999	9999	9999
9999	9999	9999	9999	9999	9999	9999	9999	9999	9999	9999	9999	9999	9999	9999	9999	9999	9999	9999	9999	9999	9999	9999	9999
9999	9999	9999	9999	9999	9999	9999	9999	9999	9999	9999	9999	9999	9999	9999	9999	9999	9999	9999	9999	9999	9999	9999	9999
9999	9999	9999	9999	9999	9999	9999	9999	9999	9999	9999	9999	9999	9999	9999	9999	9999	9999	9999	9999	9999	9999	9999	9999
9999	9999	9999	9999	9999	9999	9999	9999	9999	9999	9999	9999	9999	9999	9999	9999	9999	9999	9999	9999	9999	9999	9999	9999
9999	9999	9999	9999	9999	9999	9999	9999	9999	9999	9999	9999	9999	9999	9999	9999	9999	9999	9999	9999	9999	9999	9999	9999
9999	9999	9999	9999	9999	9999	9999	9999	9999	9999	9999	9999	9999	9999	9999	9999	9999	9999	9999	9999	9999	9999	9999	9999
9999	9999	9999	9999	9999	9999	9999	9999	9999	9999	9999	9999	9999	9999	9999	9999	9999	9999	9999	9999	9999	9999	9999	9999
9999	9999	9999	9999	9999	9999	9999	9999	9999	9999	9999	9999	9999	9999	9999	9999	9999	9999	9999	9999	9999	9999	9999	9999
9999	9999	9999	9999	9999	9999	9999	9999	9999	9999	9999	9999	9999	9999	9999	9999	9999	9999	9999	9999	9999	9999	9999	9999
9999	9999	9999	9999	9999	9999	9999	9999	9999	9999	9999	9999	9999	9999	9999	9999	9999	9999	9999	9999	9999	9999	9999	9999
9999	9999	9999	9999	9999	9999	9999	9999	9999	9999	9999	9999	9999	9999	9999	9999	9999	9999	9999	9999	9999	9999	9999	9999
9999	9999	9999	9999	9999	9999	9999	9999	9999	9999	9999	9999	9999	9999	9999	9999	9999	9999	9999	9999	9999	9999	9999	9999
9999	9999	9999	9999	9999	9999	9999	9999	9999	9999	9999	9999	9999	9999	9999	9999	9999	9999	9999	9999	9999	9999	9999	9999
9999	9999	9999	9999	9999	9999	9999	9999	9999	9999	9999	9999	9999	9999	9999	9999	9999	9999	9999	9999	9999	9999	9999	9999
9999	9999	9999	9999	9999	9999	9999	9999	9999	9999	9999	9999	9999	9999	9999	0.05733	0.05678	0.01077	9999	9999	9999	9999	9999	9999
9999	9999	9999	9999	9999	9999	9999	0.43	9999	9999	9999	9999	9999	9999	9999	9999	9999	9999	9999	0.31	9999	9999	9999	9999
9999	9999	9999	9999	9999	9999	9999	0.43	9999	9999	9999	9999	9999	9999	9999	9999	9999	9999	9999	0.35	9999	9999	9999	9999
9999	9999	9999	9999	9999	9999	9999	0.44	9999	9999	9999	9999	9999	9999	9999	9999	9999	9999	9999	0.36	9999	9999	9999	9999
9999	9999	9999	9999	9999	9999	9999	0.38	9999	9999	9999	9999	9999	9999	9999	9999	9999	9999	9999	0.24	9999	9999	9999	9999
9999	9999	9999	9999	9999	9999	9999	0.75	9999	9999	9999	9999	9999	9999	9999	9999	9999	9999	9999	0.44	9999	9999	9999	9999
9999	9999	9999	9999	9999	9999	9999	0.83	9999	9999	9999	9999	9999	9999	9999	9999	9999	9999	9999	0.21	9999	9999	9999	9999
9999	9999	9999	9999	9999	9999	9999	0.94	9999	9999	9999	9999	9999	9999	9999	9999	9999	9999	9999	0.31	9999	9999	9999	9999
9999	9999	9999	9999	9999	9999	9999	0.58	9999	9999	9999	9999	9999	9999	9999	9999	9999	9999	9999	0.39	9999	9999	9999	9999
9999	9999	9999	9999	9999	9999	9999	0.33	9999	9999	9999	9999	9999	9999	9999	9999	9999	9999	9999	0.3	9999	9999	9999	9999
9999	9999	9999	9999	9999	9999	9999	0.53	9999	9999	9999	9999	9999	9999	9999	9999	9999	9999	9999	0.25	9999	9999	9999	9999
9999	9999	9999	9999	9999	9999	9999	9999	9999	9999	9999	9999	9999	9999	9999	9999	9999	9999	9999	9999	9999	9999	9999	9999
9999	9999	9999	9999	9999	9999	9999	9999	9999	9999	9999	9999	9999	9999	9999	9999	9999	9999	9999	9999	9999	9999	9999	9999
9999	9999	9999	9999	9999	9999	9999	9999	9999	9999	9999	9999	9999	9999	9999	9999	9999	9999	9999	9999	9999	9999	9999	9999
9999	9999	9999	9999	9999	9999	9999	9999	9999	9999	9999	9999	9999	9999	9999	9999	9999	9999	9999	9999	9999	9999	9999	9999
9999	9999	9999	9999	9999	9999	9999	9999	9999	9999	9999	9999	9999	9999	9999	9999	9999	9999	9999	9999	9999	9999	9999	9999
9999	9999	9999	9999	9999	9999	9999	9999	9999	9999	9999	9999	9999	9999	9999	9999	9999	9999	9999	9999	9999	9999	9999	9999
9999	9999	9999	9999	9999	9999	9999	9999	9999	9999	9999	9999	9999	9999	9999	9999	9999	9999	9999	9999	9999	9999	9999	9999
9999	9999	9999	9999	9999	9999	9999	9999	9999	9999	9999	9999	9999	9999	9999	9999	9999	9999	9999	9999	9999	9999	9999	9999
9999	9999	9999	9999	9999	9999	9999	9999	9999	9999	9999	9999	9999	9999	9999	9999	9999	9999	9999	9999	9999	9999	9999	9999
9999	9999	9999	9999	9999	9999	9999	0.571	0.05	0.477	3.439	0.085	9999	0.101	0.0088	0.087	0.163	0.025	9999	0.249	0.033	0.161	0.776	0.043
9999	9999	9999	9999	9999	9999	9999	9999	9999	9999	9999	9999	9999	9999	9999	9999	9999	9999	9999	9999	9999	9999	9999	9999
9999	9999	9999	9999	9999	9999	9999	9999	9999	9999	9999	9999	9999	9999	9999	9999	9999	9999	9999	9999	9999	9999	9999	9999
9999	9999	9999	9999	9999	9999	9999	0.47	0.006	0.089	0.56	0.046	9999	0.38	0.0043	0.034	0.051	0.018	9999	0.54	0.0088	0.166	0.154	0.056
9999	9999	9999	9999	9999	9999	9999	0.47	0.006	0.089	0.56	0.046	9999	0.38	0.0043	0.034	0.051	0.018	9999	0.54	0.0088	0.166	0.154	0.056
9999	9999	9999	9999	9999	9999	9999	0.47	0.006	0.089	0.56	0.046	9999	0.38	0.0043	0.034	0.051	0.018	9999	0.54	0.0088	0.166	0.154	0.056
9999	9999	9999	9999	9999	9999	9999	0.47	0.006	0.089	0.56	0.046	9999	0.38	0.0043	0.034	0.051	0.018	9999	0.54	0.0088	0.166	0.154	0.056
9999	9999	9999	9999	9999	9999	9999	0.47	0.006	0.089	0.56	0.046	9999	0.38	0.0043	0.034	0.051	0.018	9999	0.54	0.0088	0.166	0.154	0.056
9999	9999	9999	9999	9999	9999	9999	9999	9999	9999	9999	9999	9999	9999	9999	9999	9999	9999	9999	9999	9999	9999	9999	9999
9999	9999	9999	9999	9999	9999	9999	0.43	0.08	0.41	0.94	0.15	9999	0.23	0.08	0.2	0.26	0.13	9999	0.33	0.1	0.32	0.46	0.2
9999	9999	9999	9999	9999	9999	9999	0.6	0.1	0.39	0.83	0.24	9999	0.2	0.08	0.21	0.15	0.1	9999	0.41	0.08	0.29	0.41	0.32
9999	9999	9999	9999	9999	9999	9999	0.79	0.09	0.38	0.82	0.13	9999	0.16	0.08	0.2	0.14	0.08	9999	0.38	0.08	0.25	0.4	0.11
9999	9999	9999	9999	9999	9999	9999	0.77	0.12	0.45	0.92	0.17	9999	0.39	0.14	0.21	0.12	0.08	9999	0.39	0.14	0.33	0.43	0.32
9999	9999	9999	9999	9999	9999	9999	0.68	0.11	0.41	0.86	0.14	9999	0.25	0.12	0.27	0.16	0.08	9999	0.35	0.11	0.26	0.44	0.2
9999	9999	9999	9999	9999	9999	9999	0.61	0.1	0.38	0.79	0.21	9999	0.3	0.11	0.21	0.12	0.07	9999	0.37	0.1	0.25	0.39	0.13
9999	9999	9999	9999	9999	9999	9999	9999	9999	9999	9999	9999	9999	9999	9999	9999	9999	9999	9999	9999	9999	9999	9999	9999
9999	9999	9999	9999	9999	9999	9999	9999	9999	9999	9999	9999	9999	9999	9999	9999	9999	9999	9999	9999	9999	9999	9999	9999
9999	9999	9999	9999	9999	9999	9999	9999	9999	9999	9999	9999	9999	9999	9999	9999	9999	9999	9999	9999	9999	9999	9999	9999
9999	9999	9999	9999	9999	9999	9999	9999	9999	9999	9999	9999	9999	9999	9999	9999	9999	9999	9999	9999	9999	9999	9999	9999
9999	9999	9999	9999	9999	9999	9999	9999	9999	9999	9999	9999	9999	9999	9999	9999	9999	9999	9999	9999	9999	9999	9999	9999
9999	9999	9999	9999	9999	9999	9999	9999	9999	9999	9999	9999	9999	9999	9999	9999	9999	9999	9999	9999	9999	9999	9999	9999
9999	9999	9999	9999	9999	9999	9999	9999	9999	9999	9999	9999	9999	9999	9999	9999	9999	9999	9999	9999	9999	9999	9999	9999
9999	9999	9999	9999	9999	9999	9999	9999	9999	9999	9999	9999	9999	9999	9999	9999	9999	9999	9999	9999	9999	9999	9999	9999
9999	9999	9999	9999	9999	9999	9999	9999	9999	9999	9999	9999	9999	9999	9999	9999	9999	9999	9999	9999	9999	9999	9999	9999
9999	9999	9999	9999	9999	9999	9999	9999	9999	9999	9999	9999	9999	9999	9999	9999	9999	9999	9999	9999	9999	9999	9999	9999
9999	9999	9999	9999	9999	9999	9999	9999	9999	9999	9999	9999	9999	9999	9999	9999	9999	9999	9999	9999	9999	9999	9999	9999
9999	9999	9999	9999	9999	9999	9999	9999	9999	9999	9999	9999	9999	9999	9999	9999	9999	9999	9999	9999	9999	9999	9999	9999
9999	9999	9999	9999	9999	9999	9999	9999	9999	9999	9999	9999	9999	9999	9999	9999	9999	9999	9999	9999	9999	9999	9999	9999
9999	9999	9999	9999	9999	9999	9999	9999	9999	9999	9999	9999	9999	9999	9999	9999	9999	9999	9999	9999	9999	9999	9999	9999
9999	9999	9999	9999	9999	9999	9999	9999	9999	9999	9999	9999	9999	9999	9999	9999	9999	9999	9999	9999	9999	9999	9999	9999
9999	9999	9999	9999	9999	9999	9999	9999	9999	9999	9999	9999	9999	9999	9999	9999	9999	9999	9999	9999	9999	9999	9999	9999
9999	9999	9999	9999	9999	9999	9999	9999	9999	9999	9999	9999	9999	9999	9999	9999	9999	9999	9999	9999	9999	9999	9999	9999
9999	9999	9999	9999	9999	9999	9999	9999	9999	9999	9999	9999	9999	9999	9999	9999	9999	9999	9999	9999	9999	9999	9999	9999
9999	9999	9999	9999	9999	9999	9999	9999	9999	9999	9999	9999	9999	9999	9999	9999	9999	9999	9999	9999	9999	9999	9999	9999
9999	9999	9999	9999	9999	9999	9999	9999	9999	9999	9999	9999	9999	9999	9999	9999	9999	9999	9999	9999	9999	9999	9999	9999
9999	9999	9999	9999	9999	9999	9999	9999	9999	9999	9999	9999	9999	9999	9999	9999	9999	9999	9999	9999	9999	9999	9999	9999
9999	9999	9999	9999	9999	9999	9999	9999	9999	9999	9999	9999	9999	9999	9999	9999	9999	9999	9999	9999	9999	9999	9999	9999
9999	9999	9999	9999	9999	9999	9999	9999	9999	9999	9999	9999	9999	9999	9999	9999	9999	9999	9999	9999	9999	9999	9999	9999
9999	9999	9999	9999	9999	9999	9999	9999	9999	9999	9999	9999	9999	9999	9999	9999	9999	9999	9999	9999	9999	9999	9999	9999
9999	9999	9999	9999	9999	9999	9999	9999	9999	9999	9999	9999	9999	9999	9999	9999	9999	9999	9999	9999	9999	9999	9999	9999
9999	9999	9999	9999	9999	9999	9999	9999	9999	9999	9999	9999	9999	9999	9999	9999	9999	9999	9999	9999	9999	9999	9999	9999
9999	9999	9999	9999	9999	9999	9999	9999	9999	9999	9999	9999	9999	9999	9999	9999	9999	9999	9999	9999	9999	9999	9999	9999
9999	9999	9999	9999	9999	9999	9999	9999	9999	9999	9999	9999	9999	9999	9999	9999	9999	9999	9999	9999	9999	9999	9999	9999
9999	9999	9999	9999	9999	9999	9999	9999	9999	9999	9999	9999	9999	9999	9999	9999	9999	9999	9999	9999	9999	9999	9999	9999
9999	9999	9999	9999	9999	9999	9999	9999	9999	9999	9999	9999	9999	9999	9999	9999	9999	9999	9999	9999	9999	9999	9999	9999
9999	9999	9999	9999	9999	9999	9999	9999	9999	9999	9999	9999	9999	9999	9999	9999	9999	9999	9999	9999	9999	9999	9999	9999
9999	9999	9999	9999	9999	9999	9999	9999	9999	9999	9999	9999	9999	9999	9999	9999	9999	9999	9999	9999	9999	9999	9999	9999
9999	9999	9999	9999	9999	9999	9999	9999	9999	9999	9999	9999	9999	9999	9999	9999	9999	9999	9999	9999	9999	9999	9999	9999
9999	9999	9999	9999	9999	9999	9999	9999	9999	9999	9999	9999	9999	9999	9999	9999	9999	9999	9999	9999	9999	9999	9999	9999
9999	9999	9999	9999	9999	9999	9999	9999	9999	9999	9999	9999	9999	9999	9999	9999	9999	9999	9999	9999	9999	9999	9999	9999
9999	9999	9999	9999	9999	9999	9999	9999	9999	9999	9999	9999	9999	9999	9999	9999	9999	9999	9999	9999	9999	9999	9999	9999
9999	9999	9999	9999	9999	9999	9999	9999	9999	9999	9999	9999	9999	9999	9999	9999	9999	9999	9999	9999	9999	9999	9999	9999
9999	9999	9999	9999	9999	9999	9999	9999	9999	9999	9999	9999	9999	9999	9999	9999	9999	9999	9999	9999	9999	9999	9999	9999
9999	9999	9999	9999	9999	9999	9999	9999	9999	9999	9999	9999	9999	9999	9999	9999	9999	9999	9999	9999	9999	9999	9999	9999
9999	9999	9999	9999	9999	9999	9999	9999	9999	9999	9999	9999	9999	9999	9999	9999	9999	9999	9999	9999	9999	9999	9999	9999
9999	9999	9999	9999	9999	9999	9999	9999	9999	9999	9999	9999	9999	9999	9999	9999	9999	9999	9999	9999	9999	9999	9999	9999
9999	9999	9999	9999	9999	9999	9999	9999	9999	9999	9999	9999	9999	9999	9999	9999	9999	9999	9999	9999	9999	9999	9999	9999
9999	9999	9999	9999	9999	9999	9999	9999	9999	9999	9999	9999	9999	9999	9999	9999	9999	9999	9999	9999	9999	9999	9999	9999
9999	9999	9999	9999	9999	9999	9999	9999	9999	9999	9999	9999	9999	9999	9999	9999	9999	9999	9999	9999	9999	9999	9999	9999
9999	9999	9999	9999	9999	9999	9999	9999	9999	9999	9999	9999	9999	9999	9999	9999	9999	9999	9999	9999	9999	9999	9999	9999
9999	9999	9999	9999	9999	9999	9999	9999	9999	9999	9999	9999	9999	9999	9999	9999	9999	9999	9999	9999	9999	9999	9999	9999
9999	9999	9999	9999	9999	9999	9999	9999	9999	9999	9999	9999	9999	9999	9999	9999	9999	9999	9999	9999	9999	9999	9999	9999
9999	9999	9999	9999	9999	9999	9999	9999	9999	9999	9999	9999	9999	9999	9999	9999	9999	9999	9999	9999	9999	9999	9999	9999
9999	9999	9999	9999	9999	9999	9999	9999	9999	9999	9999	9999	9999	9999	9999	9999	9999	9999	9999	9999	9999	9999	9999	9999
9999	9999	9999	9999	9999	9999	9999	9999	9999	9999	9999	9999	9999	9999	9999	9999	9999	9999	9999	9999	9999	9999	9999	9999
9999	9999	9999	9999	9999	9999	9999	9999	9999	9999	9999	9999	9999	9999	9999	9999	9999	9999	9999	9999	9999	9999	9999	9999
9999	9999	9999	9999	9999	9999	9999	9999	9999	9999	9999	9999	9999	9999	9999	9999	9999	9999	9999	9999	9999	9999	9999	9999
9999	9999	9999	9999	9999	9999	9999	9999	9999	9999	9999	9999	9999	9999	9999	9999	9999	9999	9999	9999	9999	9999	9999	9999
9999	9999	9999	9999	9999	9999	9999	9999	9999	9999	9999	9999	9999	9999	9999	9999	9999	9999	9999	9999	9999	9999	9999	9999
9999	9999	9999	9999	9999	9999	9999	9999	9999	9999	9999	9999	9999	9999	9999	9999	9999	9999	9999	9999	9999	9999	9999	9999
9999	9999	9999	9999	9999	9999	9999	9999	9999	9999	9999	9999	9999	9999	9999	9999	9999	9999	9999	9999	9999	9999	9999	9999
9999	9999	9999	9999	9999	9999	9999	9999	9999	9999	9999	9999	9999	9999	9999	9999	9999	9999	9999	9999	9999	9999	9999	9999
9999	9999	9999	9999	9999	9999	9999	9999	9999	9999	9999	9999	9999	9999	9999	9999	9999	9999	9999	9999	9999	9999	9999	9999
9999	9999	9999	9999	9999	9999	9999	9999	9999	9999	9999	9999	9999	9999	9999	9999	9999	9999	9999	9999	9999	9999	9999	9999
9999	9999	9999	9999	9999	9999	9999	9999	9999	9999	9999	9999	9999	9999	9999	9999	9999	9999	9999	9999	9999	9999	9999	9999
9999	9999	9999	9999	9999	9999	9999	9999	9999	9999	9999	9999	9999	9999	9999	9999	9999	9999	9999	9999	9999	9999	9999	9999
9999	9999	9999	9999	9999	9999	9999	9999	9999	9999	9999	9999	9999	9999	9999	9999	9999	9999	9999	9999	9999	9999	9999	9999
9999	9999	9999	9999	9999	9999	9999	9999	9999	9999	9999	9999	9999	9999	9999	9999	9999	9999	9999	9999	9999	9999	9999	9999
9999	9999	9999	9999	9999	9999	9999	9999	9999	9999	9999	9999	9999	9999	9999	9999	9999	9999	9999	9999	9999	9999	9999	9999
9999	9999	9999	9999	9999	9999	9999	9999	9999	9999	9999	9999	9999	9999	9999	9999	9999	9999	9999	9999	9999	9999	9999	9999
9999	9999	9999	9999	9999	9999	9999	9999	9999	9999	9999	9999	9999	9999	9999	9999	9999	9999	9999	9999	9999	9999	9999	9999
9999	9999	9999	9999	9999	9999	9999	9999	9999	9999	9999	9999	9999	9999	9999	9999	9999	9999	9999	9999	9999	9999	9999	9999
9999	9999	9999	9999	9999	9999	9999	9999	9999	9999	9999	9999	9999	9999	9999	9999	9999	9999	9999	9999	9999	9999	9999	9999
9999	9999	9999	9999	9999	9999	9999	9999	9999	9999	9999	9999	9999	9999	9999	9999	9999	9999	9999	9999	9999	9999	9999	9999
9999	9999	9999	9999	9999	9999	9999	9999	9999	9999	9999	9999	9999	9999	9999	9999	9999	9999	9999	9999	9999	9999	9999	9999
9999	9999	9999	9999	9999	9999	9999	9999	9999	9999	9999	9999	9999	9999	9999	9999	9999	9999	9999	9999	9999	9999	9999	9999
9999	9999	9999	9999	9999	9999	9999	9999	9999	9999	9999	9999	9999	9999	9999	9999	9999	9999	9999	9999	9999	9999	9999	9999
9999	9999	9999	9999	9999	9999	9999	9999	9999	9999	9999	9999	9999	9999	9999	9999	9999	9999	9999	9999	9999	9999	9999	9999
9999	9999	9999	9999	9999	9999	9999	9999	9999	9999	9999	9999	9999	9999	9999	9999	9999	9999	9999	9999	9999	9999	9999	9999
9999	9999	9999	9999	9999	9999	9999	9999	9999	9999	9999	9999	9999	9999	9999	9999	9999	9999	9999	9999	9999	9999	9999	9999
9999	9999	9999	9999	9999	9999	9999	9999	9999	9999	9999	9999	9999	9999	9999	9999	9999	9999	9999	9999	9999	9999	9999	9999
9999	9999	9999	9999	9999	9999	9999	9999	9999	9999	9999	9999	9999	9999	9999	9999	9999	9999	9999	9999	9999	9999	9999	9999
9999	9999	9999	9999	9999	9999	9999	9999	9999	9999	9999	9999	9999	9999	9999	9999	9999	9999	9999	9999	9999	9999	9999	9999
9999	9999	9999	9999	9999	9999	9999	9999	9999	9999	9999	9999	9999	9999	9999	9999	9999	9999	9999	9999	9999	9999	9999	9999
9999	9999	9999	9999	9999	9999	9999	9999	9999	9999	9999	9999	9999	9999	9999	9999	9999	9999	9999	9999	9999	9999	9999	9999
9999	9999	9999	9999	9999	9999	9999	9999	9999	9999	9999	9999	9999	9999	9999	9999	9999	9999	9999	9999	9999	9999	9999	9999
9999	9999	9999	9999	9999	9999	9999	0.36	0.048	0.073	1.156	0.037	9999	0.091	0.009	0.022	0.11	0.014	9999	0.347	0.043	0.089	0.566	0.035
9999	9999	9999	9999	9999	9999	9999	0.36	0.035	0.105	1.015	0.061	9999	0.084	0.009	0.038	0.126	0.02	9999	0.266	0.034	0.112	0.432	0.05
9999	9999	9999	9999	9999	9999	9999	0.368	0.043	0.076	1.034	0.039	9999	0.07	0.007	0.025	0.112	0.013	9999	0.315	0.034	0.09	0.616	0.036
9999	9999	9999	9999	9999	9999	9999	0.348	0.044	0.083	0.813	0.041	9999	0.08	0.007	0.025	0.108	0.011	9999	0.314	0.035	0.092	0.507	0.034
9999	9999	9999	9999	9999	9999	9999	0.312	0.048	0.07	1.029	0.036	9999	0.082	0.008	0.019	0.092	0.015	9999	0.312	0.045	0.083	0.568	0.036
9999	9999	9999	9999	9999	9999	9999	0.49	0.08	0.62	0.69	0.09	9999	0.11	0.02	0.13	0.08	0.02	9999	9999	9999	9999	9999	9999
9999	0.0926	0.0114	0.138	0.184	0.0216	9999	9999	9999	9999	9999	9999	9999	9999	9999	9999	9999	9999	9999	9999	9999	9999	9999	9999
9999	0.0666	0.00847	0.0426	0.156	0.00918	9999	9999	9999	9999	9999	9999	9999	9999	9999	9999	9999	9999	9999	9999	9999	9999	9999	9999
9999	9999	9999	9999	9999	9999	9999	9999	9999	9999	9999	9999	9999	9999	9999	9999	9999	9999	9999	9999	9999	9999	9999	9999
9999	9999	9999	9999	9999	9999	9999	9999	9999	9999	9999	9999	9999	9999	9999	9999	9999	9999	9999	9999	9999	9999	9999	9999
9999	9999	9999	9999	9999	9999	9999	0.306	0.039	0.078	0.585	0.027	9999	0.079	0.008	0.019	0.086	0.011	9999	0.262	0.032	0.079	0.333	0.022
9999	9999	9999	9999	9999	9999	9999	0.3	0.041	0.056	0.813	0.03	9999	0.082	0.008	0.022	0.083	0.006	9999	0.258	0.033	0.069	0.405	0.026
9999	9999	9999	9999	9999	9999	9999	9999	9999	9999	9999	9999	9999	9999	9999	9999	9999	9999	9999	9999	9999	9999	9999	9999
9999	9999	9999	9999	9999	9999	9999	9999	9999	9999	9999	9999	9999	9999	9999	9999	9999	9999	9999	9999	9999	9999	9999	9999
9999	9999	9999	9999	9999	9999	9999	9999	9999	9999	9999	9999	9999	9999	9999	9999	9999	9999	9999	9999	9999	9999	9999	9999
9999	9999	9999	9999	9999	9999	9999	9999	9999	9999	9999	9999	9999	9999	9999	9999	9999	9999	9999	9999	9999	9999	9999	9999
9999	9999	9999	9999	9999	9999	9999	9999	9999	9999	9999	9999	9999	9999	9999	0.0831	0.1162	0.0218	9999	9999	9999	9999	9999	9999
9999	9999	9999	9999	9999	9999	9999	9999	9999	9999	9999	9999	9999	9999	9999	0.0588	0.0944	0.0158	9999	9999	9999	9999	9999	9999
9999	0.33754	9999	0.30124	0.46022	0.05734	9999	9999	9999	9999	9999	9999	9999	9999	9999	9999	9999	9999	9999	0.2972	9999	0.1725	0.4122	0.0383
9999	0.18006	9999	0.08993	0.20997	0.0179	9999	9999	9999	9999	9999	9999	9999	9999	9999	9999	9999	9999	9999	0.3507	9999	0.1617	0.4161	0.0436
9999	9999	9999	9999	9999	9999	9999	9999	9999	9999	9999	9999	9999	9999	0.0099	0.15193	0.10054	0.02106	9999	9999	9999	9999	9999	9999
9999	9999	9999	9999	9999	9999	9999	9999	9999	9999	9999	9999	9999	9999	0.00019	0.05838	0.12737	0.01714	9999	9999	9999	9999	9999	9999
9999	9999	9999	9999	9999	9999	9999	9999	9999	9999	9999	9999	9999	9999	9999	9999	9999	9999	9999	9999	9999	9999	9999	9999
9999	9999	9999	9999	9999	9999	9999	9999	9999	9999	9999	9999	9999	9999	9999	9999	9999	9999	9999	9999	9999	9999	9999	9999
9999	9999	9999	9999	9999	9999	9999	9999	9999	9999	9999	9999	9999	9999	9999	9999	9999	9999	9999	9999	9999	9999	9999	9999
9999	9999	9999	9999	9999	9999	9999	9999	9999	9999	9999	9999	9999	9999	9999	9999	9999	9999	9999	9999	9999	9999	9999	9999
9999	9999	9999	9999	9999	9999	9999	9999	9999	9999	9999	9999	9999	9999	9999	9999	9999	9999	9999	9999	9999	9999	9999	9999
9999	9999	9999	9999	9999	9999	9999	9999	9999	9999	9999	9999	9999	9999	9999	9999	9999	9999	9999	9999	9999	9999	9999	9999
9999	9999	9999	9999	9999	9999	9999	9999	9999	9999	9999	9999	9999	9999	9999	9999	9999	9999	9999	9999	9999	9999	9999	9999
9999	9999	9999	9999	9999	9999	9999	9999	9999	9999	9999	9999	9999	9999	9999	9999	9999	9999	9999	9999	9999	9999	9999	9999
9999	9999	9999	9999	9999	9999	9999	9999	9999	9999	9999	9999	9999	9999	9999	9999	9999	9999	9999	9999	9999	9999	9999	9999
9999	9999	9999	9999	9999	9999	9999	9999	9999	9999	9999	9999	9999	9999	9999	9999	9999	9999	9999	9999	9999	9999	9999	9999
9999	9999	9999	9999	9999	9999	9999	9999	9999	9999	9999	9999	9999	9999	9999	9999	9999	9999	9999	9999	9999	9999	9999	9999
9999	9999	9999	9999	9999	9999	9999	9999	9999	9999	9999	9999	9999	9999	9999	9999	9999	9999	9999	9999	9999	9999	9999	9999
9999	9999	9999	9999	9999	9999	9999	9999	9999	9999	9999	9999	9999	9999	9999	9999	9999	9999	9999	9999	9999	9999	9999	9999
9999	9999	9999	9999	9999	9999	9999	9999	9999	9999	9999	9999	9999	9999	9999	9999	9999	9999	9999	9999	9999	9999	9999	9999
9999	9999	9999	9999	9999	9999	9999	9999	9999	9999	9999	9999	9999	9999	9999	9999	9999	9999	9999	9999	9999	9999	9999	9999
9999	9999	9999	9999	9999	9999	9999	9999	9999	9999	9999	9999	9999	9999	9999	9999	9999	9999	9999	9999	9999	9999	9999	9999
9999	9999	9999	9999	9999	9999	9999	9999	9999	9999	9999	9999	9999	9999	9999	9999	9999	9999	9999	9999	9999	9999	9999	9999
9999	9999	9999	9999	9999	9999	9999	9999	9999	9999	9999	9999	9999	9999	9999	9999	9999	9999	9999	9999	9999	9999	9999	9999
9999	9999	9999	9999	9999	9999	9999	9999	9999	9999	9999	9999	9999	9999	9999	9999	9999	9999	9999	9999	9999	9999	9999	9999
9999	9999	9999	9999	9999	9999	9999	9999	9999	9999	9999	9999	9999	9999	9999	9999	9999	9999	9999	9999	9999	9999	9999	9999
9999	9999	9999	9999	9999	9999	9999	9999	9999	9999	9999	9999	9999	9999	9999	9999	9999	9999	9999	9999	9999	9999	9999	9999
9999	9999	9999	9999	9999	9999	9999	9999	9999	9999	9999	9999	9999	9999	9999	9999	9999	9999	9999	9999	9999	9999	9999	9999
9999	9999	9999	9999	9999	9999	9999	9999	9999	9999	9999	9999	9999	9999	9999	9999	9999	9999	9999	9999	9999	9999	9999	9999
9999	9999	9999	9999	9999	9999	9999	9999	9999	9999	9999	9999	9999	9999	9999	9999	9999	9999	9999	9999	9999	9999	9999	9999
9999	9999	9999	9999	9999	9999	9999	9999	9999	9999	4.0067	9999	9999	9999	9999	9999	0.1253	9999	9999	9999	9999	9999	9999	9999
9999	9999	9999	9999	9999	9999	9999	9999	9999	9999	3.4047	9999	9999	9999	9999	9999	0.1583	9999	9999	9999	9999	9999	9999	9999
9999	9999	9999	9999	9999	9999	9999	9999	9999	9999	2.9743	9999	9999	9999	9999	9999	0.1035	9999	9999	9999	9999	9999	9999	9999
9999	9999	9999	9999	9999	9999	9999	9999	9999	9999	1.1608	9999	9999	9999	9999	9999	0.1785	9999	9999	9999	9999	9999	9999	9999
9999	9999	9999	9999	9999	9999	9999	9999	9999	9999	4.5063	9999	9999	9999	9999	9999	0.1662	9999	9999	9999	9999	9999	9999	9999
9999	9999	9999	9999	9999	9999	9999	9999	9999	9999	9999	9999	9999	9999	9999	9999	0.0484	9999	9999	9999	9999	9999	9999	9999
9999	9999	9999	9999	9999	9999	9999	9999	9999	9999	0.7216	9999	9999	9999	9999	9999	0.0603	9999	9999	9999	9999	9999	9999	9999
9999	9999	9999	9999	9999	9999	9999	9999	9999	9999	3.2967	9999	9999	9999	9999	9999	0.0514	9999	9999	9999	9999	9999	9999	9999
9999	9999	9999	9999	9999	9999	9999	9999	9999	9999	3.642	9999	9999	9999	9999	9999	0.1065	9999	9999	9999	9999	9999	9999	9999
9999	9999	9999	9999	9999	9999	9999	9999	9999	9999	1.4551	9999	9999	9999	9999	9999	0.1007	9999	9999	9999	9999	9999	9999	9999
9999	9999	9999	9999	9999	9999	9999	9999	9999	9999	2.0692	9999	9999	9999	9999	9999	0.1032	9999	9999	9999	9999	9999	9999	9999
9999	9999	9999	9999	9999	9999	9999	9999	9999	9999	1.638	9999	9999	9999	9999	9999	0.1222	9999	9999	9999	9999	9999	9999	9999
9999	9999	9999	9999	9999	9999	9999	9999	9999	9999	2.6893	9999	9999	9999	9999	9999	0.0751	9999	9999	9999	9999	9999	9999	9999
9999	9999	9999	9999	9999	9999	9999	9999	9999	9999	2.2059	9999	9999	9999	9999	9999	0.1233	9999	9999	9999	9999	9999	9999	9999
9999	9999	9999	9999	9999	9999	9999	9999	9999	9999	5.7149	9999	9999	9999	9999	9999	0.1272	9999	9999	9999	9999	9999	9999	9999
9999	9999	9999	9999	9999	9999	9999	9999	9999	9999	9999	9999	9999	9999	9999	9999	9999	9999	9999	9999	9999	9999	9999	9999
9999	9999	9999	9999	9999	9999	9999	9999	9999	9999	9999	9999	9999	9999	9999	9999	9999	9999	9999	9999	9999	9999	9999	9999
9999	9999	9999	9999	9999	9999	9999	9999	9999	9999	9999	9999	9999	9999	9999	9999	9999	9999	9999	9999	9999	9999	9999	9999
9999	9999	9999	9999	9999	9999	9999	9999	9999	9999	9999	9999	9999	9999	9999	9999	9999	9999	9999	9999	9999	9999	9999	9999
9999	9999	9999	9999	9999	9999	9999	9999	9999	9999	9999	9999	9999	9999	9999	9999	9999	9999	9999	9999	9999	9999	9999	9999
9999	9999	9999	9999	9999	9999	9999	9999	9999	9999	9999	9999	9999	9999	9999	9999	9999	9999	9999	9999	9999	9999	9999	9999
9999	9999	9999	9999	9999	9999	9999	9999	9999	9999	9999	9999	9999	9999	9999	9999	9999	9999	9999	9999	9999	9999	9999	9999
9999	9999	9999	9999	9999	9999	9999	9999	9999	9999	9999	9999	9999	9999	9999	9999	9999	9999	9999	9999	9999	9999	9999	9999
9999	9999	9999	9999	9999	9999	9999	9999	9999	9999	9999	9999	9999	9999	9999	9999	9999	9999	9999	9999	9999	9999	9999	9999
9999	9999	9999	9999	9999	9999	9999	9999	9999	9999	9999	9999	9999	9999	9999	9999	9999	9999	9999	9999	9999	9999	9999	9999
9999	9999	9999	9999	9999	9999	9999	9999	9999	9999	9999	9999	9999	9999	9999	9999	9999	9999	9999	9999	9999	9999	9999	9999
9999	9999	9999	9999	9999	9999	9999	9999	9999	9999	9999	9999	9999	9999	9999	9999	9999	9999	9999	9999	9999	9999	9999	9999
9999	represent the lack of data

## Sheet: Leaf
Impacts of Enhanced Weathering on biomass production for negative emission technologies and soil hydrology Authors: Authors: Wagner de Oliveira Garcia*1, Thorben Amann1, Jens Hartmann1, Kristine Karstens2, Alexander Popp2, Lena R. Boysen3, Pete Smith4, Daniel Goll5,6 Affiliation: 1Institute for Geology, Center for Earth System Research and Sustainability, Universität Hamburg, Germany 2Potsdam Ins…
Vergutz, L., Manzoni, S., Porporato, A., Novais, R.F., Jackson, R.B., 2012. A Global Database of Carbon and Nutrient Concentrations of Green and Senesced Leaves. ORNL Distributed Active Archive Center.
Record_number	Ref	Study_number	Country	Region	City	Site_name	Lat	Long	K_ppen_CC	Vegetation	Species	Family	Growth_habit	Senesced_sample_method	MAT	TAP	Elevation	C_green_leaf	C_senesced_leaf	N_green_leaf	N_senesced_leaf	P_green_leaf	P_senesced_leaf	K_green_leaf	K_senesced_leaf	Ca_green_leaf	Ca_senesced_leaf	Mg_green_leaf	Mg_senesced_leaf	Spec_area_green_leaf	Spec_area_senesced_leaf	Area_green_leaf	Area_senesced_leaf	Mass_green_leaf	Mass_senesced_leaf	Leaf_loss	Leaf_shrink
785	Allison & Vitousek (2004)	1	USA	HI			19.7	-155.1	A	Wet tropical forest	Cibotium glaucum	Cibotiaceae	Ferns	Picked from the plant or recently fallen	23	4000	150			1.4	0.75	0.1	0.04							87.7
786	Allison & Vitousek (2004)	1	USA	HI			19.7	-155.1	A	Wet tropical forest	Dicranopteris linearis	Gleicheniaceae	Ferns	Picked from the plant or recently fallen	23	4000	150			0.87	0.53	0.06	0.03							89.3
787	Allison & Vitousek (2004)	1	USA	HI			19.7	-155.1	A	Wet tropical forest	Dicranopteris sandwichianum	Gleicheniaceae	Ferns	Picked from the plant or recently fallen	23	4000	150			2.15	1.42	0.24	0.08							44.1
788	Allison & Vitousek (2004)	1	USA	HI			19.7	-155.1	A	Wet tropical forest	Eriogonum alatum	Polygonaceae	Forb	Picked from the plant or recently fallen	23	4000	150			0.81	0.49	0.06	0.02							105.3
789	Allison & Vitousek (2004)	1	USA	HI			19.7	-155.1	A	Wet tropical forest	Sphaeropteris cooperi	Cyatheaceae	Ferns	Picked from the plant or recently fallen	23	4000	150			2.05	1.29	0.14	0.12							54.6
790	Allison & Vitousek (2004)	1	USA	HI			19.7	-155.1	A	Wet tropical forest	Vaccinium calycinum	Ericaceae	Tree (deciduous)	Picked from the plant or recently fallen	23	4000	150			1.05	0.56	0.06	0.03							69.4
791	Allison & Vitousek (2004)	1	USA	HI			19.7	-155.1	A	Wet tropical forest	Hedychium gardnerianum	Zingiberaceae	Forb	Picked from the plant or recently fallen	23	4000	150			1.48	0.38	0.11	0.03							59.9
792	Allison & Vitousek (2004)	1	USA	HI			19.7	-155.1	A	Wet tropical forest	Setaria palmifolia	Gramineae	Graminoid	Picked from the plant or recently fallen	23	4000	150			1.92	0.68	0.15	0.04							42.2
793	Allison & Vitousek (2004)	1	USA	HI			19.7	-155.1	A	Wet tropical forest	Clidemia hirta	Melastomataceae	Tree (evergreen)	Picked from the plant or recently fallen	23	4000	150			1.56	0.75	0.07	0.03							49
794	Allison & Vitousek (2004)	1	USA	HI			19.7	-155.1	A	Wet tropical forest	Miconia calvescens	Melastomataceae	Tree (evergreen)	Picked from the plant or recently fallen	23	4000	150			1.92	1.02	0.12	0.05							49.5
795	Allison & Vitousek (2004)	1	USA	HI			19.7	-155.1	A	Wet tropical forest	Tibouchina herbacea	Melastomataceae	Forb	Picked from the plant or recently fallen	23	4000	150			1.97	0.78	0.1	0.05							37.5
1	Bertiller et al. (2006)	2	Argentina	Patagonia			-43.3	-71	C	Steppe	Perennial grasses		Graminoid	Picked from the plant	9.3	255	405	56.28	46.6	1.92	0.35	0.15	0.05							265.4
2	Bertiller et al. (2006)	2	Argentina	Patagonia			-43.3	-71	C	Steppe	Shrubs		Trees	Picked from the plant	9.3	255	405	44.76	48.28	1.7	0.81	0.19	0.06							244
3	Bertiller et al. (2006)	2	Argentina	Patagonia			-40.3	-71.5	C	Rain forest	Coniferous trees		Conifers	Picked from the plant	7.3	1650	940	48.85	48.26	0.71	0.38	0.09	0.05							316.8
4	Bertiller et al. (2006)	2	Argentina	Patagonia			-40.3	-71.5	C	Rain forest	Broad-leaved evergreen trees		Tree (evergreen)	Picked from the plant	7.3	1650	940	47.61	40.09	1.33	0.78	0.1	0.06							121
5	Bertiller et al. (2006)	2	Argentina	Patagonia			-40.3	-71.5	C	Rain forest	Broad-leaved deciduous trees		Tree (deciduous)	Picked from the plant	7.3	1650	940	47.87	48.96	2.37	0.68	0.18	0.11							59.5
847	Blanco et al. (2009)	3	Spain	Navarre province	Pyrenees	Garde	42.7	-1.1	C		Pinus sylvestris	Pinaceae	Conifers		7.6	1268	1335			1.33	0.78	0.14	0.07
848	Blanco et al. (2009)	3	Spain	Navarre province	Pyrenees	Aspurz	42.8	-0.9	C		Pinus sylvestris	Pinaceae	Conifers		12	912	625			1.48	0.85	0.1	0.04
646	Boerner (1984)	4	USA	OH			39.6	-82.6	C	Forest	Quercus prinus	Fagaceae	Tree (deciduous)	Litterfall traps cleared every week	10.7	1000	300			2.54	0.79	0.2	0.1
647	Boerner (1984)	4	USA	OH			39.6	-82.6	C	Forest	Quercus prinus	Fagaceae	Tree (deciduous)	Litterfall traps cleared every week	10.7	1000	300			2.29	0.74	0.18	0.05
648	Boerner (1984)	4	USA	OH			39.6	-82.6	C	Forest	Quercus alba	Fagaceae	Tree (deciduous)	Litterfall traps cleared every week	10.7	1000	300			2.37	0.88	0.22	0.07
649	Boerner (1984)	4	USA	OH			39.6	-82.6	C	Forest	Quercus alba	Fagaceae	Tree (deciduous)	Litterfall traps cleared every week	10.7	1000	300			2.24	0.6	0.19	0.05
650	Boerner (1984)	4	USA	OH			39.6	-82.6	C	Forest	Acer rubrum	Sapindaceae	Tree (deciduous)	Litterfall traps cleared every week	10.7	1000	300			1.77	0.8	0.14	0.09
651	Boerner (1984)	4	USA	OH			39.6	-82.6	C	Forest	Acer rubrum	Sapindaceae	Tree (deciduous)	Litterfall traps cleared every week	10.7	1000	300			1.38	0.6	0.14	0.04
652	Boerner (1984)	4	USA	OH			39.6	-82.6	C	Forest	Fagus grandifolia	Fagaceae	Tree (deciduous)	Litterfall traps cleared every week	10.7	1000	300			2.27	0.82	0.13	0.07
653	Boerner (1984)	4	USA	OH			39.6	-82.6	C	Forest	Fagus grandifolia	Fagaceae	Tree (deciduous)	Litterfall traps cleared every week	10.7	1000	300			2.32	0.82	0.14	0.05
680	Bowman et al. (1995)	5	USA	CO	Niwot Ridge	Colorado Rocky Mountains	40.1	-105.6	D		Acomastylis rossii	Rosaceae	Forb	Picked from the plant	-3	900	3520			2.21	0.9
681	Bowman et al. (1995)	5	USA	CO	Niwot Ridge	Colorado Rocky Mountains	40.1	-105.6	D		Bistorta vivipara	Polygonaceae	Forb	Picked from the plant	-3	900	3520			3.83	0.97
682	Bowman et al. (1995)	5	USA	CO	Niwot Ridge	Colorado Rocky Mountains	40.1	-105.6	D		Calamagrostis purpurascens	Poaceae	Graminoid	Picked from the plant	-3	900	3520			1.82	0.77
683	Bowman et al. (1995)	5	USA	CO	Niwot Ridge	Colorado Rocky Mountains	40.1	-105.6	D		Carex rupestris	Cyperaceae	Graminoid	Picked from the plant	-3	900	3520			1.49	0.79
684	Bowman et al. (1995)	5	USA	CO	Niwot Ridge	Colorado Rocky Mountains	40.1	-105.6	D		Kobresia myosuroides	Cyperaceae	Graminoid	Picked from the plant	-3	900	3520			2.42	1.07
685	Bowman et al. (1995)	5	USA	CO	Niwot Ridge	Colorado Rocky Mountains	40.1	-105.6	D		Acomastylis rossii	Rosaceae	Forb	Picked from the plant	-3	900	3520			2.67	1.15
686	Bowman et al. (1995)	5	USA	CO	Niwot Ridge	Colorado Rocky Mountains	40.1	-105.6	D		Artemisia scopulorum	Asteraceae	Forb	Picked from the plant	-3	900	3520			3.07	1.11
687	Bowman et al. (1995)	5	USA	CO	Niwot Ridge	Colorado Rocky Mountains	40.1	-105.6	D		Bistorta bistotoides	Polygonaceae	Forb	Picked from the plant	-3	900	3520			3.38	1.4
688	Bowman et al. (1995)	5	USA	CO	Niwot Ridge	Colorado Rocky Mountains	40.1	-105.6	D		Deschampsia caespitosa	Poaceae	Graminoid	Picked from the plant	-3	900	3520			2.4	1.09
211	Cai & Bongers (2007)	6	China	Mengsong	Xishuangbanna	Yunnan	21.5	100.4	A	Tropical Montane Rain Forest	Alangium chinensis	Alangiaceae	Tree (evergreen)	Picked from the plant	20.5	1380	1400			3.15	1.2	0.18	0.07							53.5	51.9	126.5	121	676.8	628	7.2	4.3
212	Cai & Bongers (2007)	6	China	Mengsong	Xishuangbanna	Yunnan	21.5	100.4	A	Tropical Montane Rain Forest	Alseodaphne petiolaris	Lauraceae	Tree (evergreen)	Picked from the plant	20.5	1380	1400			1.78	0.74	0.08	0.04							128.3	95.5	163.1	149.8	2092.6	1430.6	31.6	8.1
213	Cai & Bongers (2007)	6	China	Mengsong	Xishuangbanna	Yunnan	21.5	100.4	A	Tropical Montane Rain Forest	Calophyllum polyanthum	Clusiaceae	Tree (evergreen)	Picked from the plant	20.5	1380	1400			1.68	1.6	0.08	0.05							177.9	153.8	27.2	26.5	483.9	407.6	15.7	2.4
214	Cai & Bongers (2007)	6	China	Mengsong	Xishuangbanna	Yunnan	21.5	100.4	A	Tropical Montane Rain Forest	Cryptocarya densiflora	Lauraceae	Tree (evergreen)	Picked from the plant	20.5	1380	1400			2.1	1.81	0.09	0.04							187.9	172.5	85.2	79.7	1600.9	1374.8	14.2	6.5
215	Cai & Bongers (2007)	6	China	Mengsong	Xishuangbanna	Yunnan	21.5	100.4	A	Tropical Montane Rain Forest	Cyclobalanopsis sp.	Fagaceae	Tree (evergreen)	Picked from the plant	20.5	1380	1400			1.71	1.33	0.07	0.04							129.4	118.8	25.9	23.7	335.1	281.6	16.3	8.8
216	Cai & Bongers (2007)	6	China	Mengsong	Xishuangbanna	Yunnan	21.5	100.4	A	Tropical Montane Rain Forest	Diospyros kerrii	Ebenaceae	Tree (evergreen)	Picked from the plant	20.5	1380	1400			1.84	0.78	0.08	0.04							190	178.6	86.1	85.3	1635.9	1523.5	6.9	0.9
217	Cai & Bongers (2007)	6	China	Mengsong	Xishuangbanna	Yunnan	21.5	100.4	A	Tropical Montane Rain Forest	Elaeocarpus sylvestris	Elaeocarpaceae	Tree (evergreen)	Picked from the plant	20.5	1380	1400			2.4	0.96	0.1	0.05							76.2	71	98.7	76.7	752.1	544.6	27.6	22.3
218	Cai & Bongers (2007)	6	China	Mengsong	Xishuangbanna	Yunnan	21.5	100.4	A	Tropical Montane Rain Forest	Engelhardtia roxburghiana	Juglandaceae	Tree (evergreen)	Picked from the plant	20.5	1380	1400			2.36	2.08	0.11	0.06							102.2	95.7	67.2	56.9	686.8	544.5	20.6	15.2
219	Cai & Bongers (2007)	6	China	Mengsong	Xishuangbanna	Yunnan	21.5	100.4	A	Tropical Montane Rain Forest	Euodia trichotoma	Rutaceae	Tree (evergreen)	Picked from the plant	20.5	1380	1400			3.06	2.45	0.17	0.09							86.1	76.8	56.2	47.5	483.9	364.8	24.7	15.5
220	Cai & Bongers (2007)	6	China	Mengsong	Xishuangbanna	Yunnan	21.5	100.4	A	Tropical Montane Rain Forest	Hovenia acerba	Rhamnaceae	Tree (evergreen)	Picked from the plant	20.5	1380	1400			3.72	1.62	0.19	0.07							51.7	44.5	68.8	65.5	355.7	291.5	18.1	4.8
221	Cai & Bongers (2007)	6	China	Mengsong	Xishuangbanna	Yunnan	21.5	100.4	A	Tropical Montane Rain Forest	Michelia floribunda	Magnoliaceae	Tree (evergreen)	Picked from the plant	20.5	1380	1400			2	0.83	0.15	0.04							79.1	67.8	38.1	34.6	301.4	234.6	22.1	9.1
222	Cai & Bongers (2007)	6	China	Mengsong	Xishuangbanna	Yunnan	21.5	100.4	A	Tropical Montane Rain Forest	Schima superba	Theaceae	Tree (evergreen)	Picked from the plant	20.5	1380	1400			1.86	1.33	0.09	0.05							122.1	104.9	70.3	64.5	858.4	676.6	21.3	8.4
223	Cai & Bongers (2007)	6	China	Mengsong	Xishuangbanna	Yunnan	21.5	100.4	A	Tropical Montane Rain Forest	Toxicodendron succedaneum	Anarcadiaceae	Tree (evergreen)	Picked from the plant	20.5	1380	1400			1.81	0.7	0.12	0.04							89.6	84.4	27.9	24.4	250	205.9	17.9	12.7
224	Cai & Bongers (2007)	6	China	Mengsong	Xishuangbanna	Yunnan	21.5	100.4	A	Tropical Montane Rain Forest	Toxicodendron sp.	Anarcadiaceae	Tree (evergreen)	Picked from the plant	20.5	1380	1400			2.41	1.91	0.18	0.1							136.5	128.2	58.8	56.9	802.6	729.5	9.1	3.2
225	Cai & Bongers (2007)	6	China	Mengsong	Xishuangbanna	Yunnan	21.5	100.4	A	Tropical Montane Rain Forest	Akebia trifoliata	Lardizabalaceae	Tree (evergreen)	Picked from the plant	20.5	1380	1400			1.81	1.12	0.09	0.05							149	161.7	30	25.5	447	412.3	8	15.2
226	Cai & Bongers (2007)	6	China	Mengsong	Xishuangbanna	Yunnan	21.5	100.4	A	Tropical Montane Rain Forest	Artabotrys hongkongensis	Annonaceae	Tree (evergreen) Liana	Picked from the plant	20.5	1380	1400			2.36	1.77	0.12	0.12							76.1	61.5	31.8	24.8	242	152.5	36.9	21.9
227	Cai & Bongers (2007)	6	China	Mengsong	Xishuangbanna	Yunnan	21.5	100.4	A	Tropical Montane Rain Forest	Craspedolobium schochii	N-fixer Fabaceae	Tree (evergreen) Liana	Picked from the plant	20.5	1380	1400			2.15	1.55	0.13	0.07							96.4	85.2	68.2	63.5	657.4	541	17.7	6.9
228	Cai & Bongers (2007)	6	China	Mengsong	Xishuangbanna	Yunnan	21.5	100.4	A	Tropical Montane Rain Forest	Gnetum pendulum	Gnetaceae	Tree (evergreen) Liana	Picked from the plant	20.5	1380	1400			3.11	2.71	0.14	0.08							110.3	89.5	54.8	51.3	604.4	459.1	24	6.4
229	Cai & Bongers (2007)	6	China	Mengsong	Xishuangbanna	Yunnan	21.5	100.4	A	Tropical Montane Rain Forest	Melodinus henryi	Apocynaceae	Tree (evergreen) Liana	Picked from the plant	20.5	1380	1400			2.28	1.24	0.19	0.09							107.1	93	35.6	31.3	381.3	291.1	23.7	12.1
230	Cai & Bongers (2007)	6	China	Mengsong	Xishuangbanna	Yunnan	21.5	100.4	A	Tropical Montane Rain Forest	Melodinus suaveolens	Apocynaceae	Tree (evergreen) Liana	Picked from the plant	20.5	1380	1400			2.69	1.88	0.13	0.09							91.6	81.3	32.3	25.8	295.9	209.8	29.2	20.3
231	Cai & Bongers (2007)	6	China	Mengsong	Xishuangbanna	Yunnan	21.5	100.4	A	Tropical Montane Rain Forest	Millettia pachycarpa	N-fixer Fabaceae	Tree (evergreen)	Picked from the plant	20.5	1380	1400			3.36	2.04	0.12	0.08							101.5	91.3	41.5	37.2	421.2	339.6	19.1	10.2
232	Cai & Bongers (2007)	6	China	Mengsong	Xishuangbanna	Yunnan	21.5	100.4	A	Tropical Montane Rain Forest	Smilax corbularia	Smilacaceae	Tree (evergreen) Liana	Picked from the plant	20.5	1380	1400			1.58	1.02	0.15	0.08							100.2	87.6	62.1	53.2	622.2	466	25.1	14.3
233	Cai & Bongers (2007)	6	China	Mengsong	Xishuangbanna	Yunnan	21.5	100.4	A	Tropical Montane Rain Forest	Smilax hypoglauca	Smilacaceae	Tree (evergreen) Liana	Picked from the plant	20.5	1380	1400			1.96	1.16	0.09	0.05							63.2	60.1	15.2	15	96.1	90.2	6.1	1.3
234	Cai & Bongers (2007)	6	China	Mengsong	Xishuangbanna	Yunnan	21.5	100.4	A	Tropical Montane Rain Forest	Smilax microphylla	Smilacaceae	Tree (evergreen) Liana	Picked from the plant	20.5	1380	1400			2.29	1.62	0.1	0.07							87.6	73.5	69.5	61.6	608.8	452.8	25.7	11.4
235	Cai & Bongers (2007)	6	China	Mengsong	Xishuangbanna	Yunnan	21.5	100.4	A	Tropical Montane Rain Forest	Spatholobus suberectus	N-fixer Fabaceae	Tree (evergreen) Liana	Picked from the plant	20.5	1380	1400			3.82	2.04	0.17	0.05							123.5	103.5	114.7	93.2	1416.5	964.6	31.9	18.7
236	Cai & Bongers (2007)	6	China	Mengsong	Xishuangbanna	Yunnan	21.5	100.4	A	Tropical Montane Rain Forest	Uncaria rhynchophylla	Rubiaceae	Tree (evergreen) Liana	Picked from the plant	20.5	1380	1400			2.08	0.95	0.07	0.03							105.9	96.6	27.2	23.7	288	228.9	20.6	12.9
6	Campanella & Bertiller (2008)	7	Argentina	Chubut Province	Patagonian Monte		-42.7	-65.4	B	Shrubland	Chuquiraga avellanedae	Asteraceae	Tree (evergreen)	Picked from the plant	13.9	258	115			1.5	0.4									216.3
7	Campanella & Bertiller (2008)	7	Argentina	Chubut Province	Patagonian Monte		-42.7	-65.4	B	Shrubland	Chuquiraga hystrix	Asteraceae	Tree (evergreen)	Picked from the plant	13.9	258	115			1.1	0.57									411.5
8	Campanella & Bertiller (2008)	7	Argentina	Chubut Province	Patagonian Monte		-42.7	-65.4	B	Shrubland	Larrea nitida	Zygophyllaceae	Tree (evergreen)	Picked from the plant	13.9	258	115			2.47	0.97									148.2
9	Campanella & Bertiller (2008)	7	Argentina	Chubut Province	Patagonian Monte		-42.7	-65.4	B	Shrubland	Larrea divaricata	Zygophyllaceae	Tree (evergreen)	Picked from the plant	13.9	258	115			1.77	0.72									181.3
10	Campanella & Bertiller (2008)	7	Argentina	Chubut Province	Patagonian Monte		-42.7	-65.4	B	Shrubland	Atriplex lampa	Chenopodiaceae	Tree (evergreen)	Picked from the plant	13.9	258	115			1.32	0.67									197.5
11	Campanella & Bertiller (2008)	7	Argentina	Chubut Province	Patagonian Monte		-42.7	-65.4	B	Shrubland	Prosopis alpataco	N-fixer Fabaceae	Tree (deciduous)	Picked from the plant	13.9	258	115			3.65	2.26									166.4
12	Campanella & Bertiller (2008)	7	Argentina	Chubut Province	Patagonian Monte		-42.7	-65.4	B	Shrubland	Lycium chilense	Solanaceae	Tree (deciduous)	Picked from the plant	13.9	258	115			5.2	1.06									98.4
13	Campanella & Bertiller (2008)	7	Argentina	Chubut Province	Patagonian Monte		-42.7	-65.4	B	Shrubland	Bougainvillea spinosa	Nyctaginaceae	Tree (deciduous)	Picked from the plant	13.9	258	115			2.42	0.75									144.3
14	Campanella & Bertiller (2008)	7	Argentina	Chubut Province	Patagonian Monte		-42.7	-65.4	B	Shrubland	Stipa tenuis	Poaceae	Graminoid	Picked from the plant	13.9	258	115			3.51	0.75									113.2
15	Campanella & Bertiller (2008)	7	Argentina	Chubut Province	Patagonian Monte		-42.7	-65.4	B	Shrubland	Stipa speciosa	Poaceae	Graminoid	Picked from the plant	13.9	258	115			1.44	0.53									237.9
16	Campanella & Bertiller (2008)	7	Argentina	Chubut Province	Patagonian Monte		-42.7	-65.4	B	Shrubland	Poa ligularis	Poaceae	Graminoid	Picked from the plant	13.9	258	115			2.24	0.98									144
496	Cardenas & Campo (2007)	8	Mexico	Sierra de Huatla Reserve		Primary forest	18.5	-99	A	Seasonally tropical dry forest	Lysiloma microphyllum	N-fixer Fabaceae	Tree (deciduous)	Picked from the plant	24.5	850	930			2.31	1.95	0.21	0.1
497	Cardenas & Campo (2007)	8	Mexico	Sierra de Huatla Reserve		Early successional (10 years)	18.5	-99	A	Seasonally tropical dry forest	Lysiloma microphyllum	N-fixer Fabaceae	Tree (deciduous)	Picked from the plant	24.5	850	930			3.23	1.87	0.17	0.07
498	Cardenas & Campo (2007)	8	Mexico	Sierra de Huatla Reserve		Late successional (60 years)	18.5	-99	A	Seasonally tropical dry forest	Lysiloma microphyllum	N-fixer Fabaceae	Tree (deciduous)	Picked from the plant	24.5	850	930			2.52	1.99	0.22	0.1
526	Cartaxana & Catarino (2002)	9	Portugal	Tagus estuary	Vasa Sacos salt marsh	Lower marsh	38.8	-9	C	Salt marsh plant species	Spartina maritima (Curtis) Fernald	Poaceae	Graminoid	Picked from the plant	17	650	0			2.42	1.87
527	Cartaxana & Catarino (2002)	9	Portugal	Tagus estuary	Vasa Sacos salt marsh	Mid marsh	38.8	-9	C	Salt marsh plant species	Halimione portulacoides (L.) Aellen	Amaranthaceae	Tree (evergreen)	Picked from the plant	17	650	0			1.64	0.8
528	Cartaxana & Catarino (2002)	9	Portugal	Tagus estuary	Vasa Sacos salt marsh	Upper marsh	38.8	-9	C	Salt marsh plant species	Arthrocnemum perenne (Miller) Moss.	Chenopodiaceae	Forb	Picked from the plant	17	650	0			1.84	0.95
948	Chapin & Kedrowski (1983)	10	USA	AK	Fairbanks	University of Alaska	65.9	-147.8	E		Betula papyrifera	Betulaceae	Tree (deciduous)		-3	400	200			1.99	0.5	0.17	0.1													33.9
949	Chapin & Kedrowski (1983)	10	USA	AK	Fairbanks	University of Alaska	65.9	-147.8	E		Alnus crispa	N-fixer Betulaceae	Tree (deciduous)		-3	400	200			2.48	0.94	0.13	0.02													36.5
950	Chapin & Kedrowski (1983)	10	USA	AK	Fairbanks	University of Alaska	65.9	-147.8	E		Larix laricina	Pinaceae	Conifers		-3	400	200			2.24	0.47	0.21	0.12													42.3
951	Chapin & Kedrowski (1983)	10	USA	AK	Fairbanks	University of Alaska	65.9	-147.8	E		Picea mariana	Pinaceae	Conifers		-3	400	200																			11.4
952	Chapin & Kedrowski (1983)	10	Sweden						D		Tilia platyphylla	Tiliaceae	Tree (deciduous)									0.37	0.22													22
953	Chapin & Kedrowski (1983)	10	Sweden						D		Carpinus betulus	Betulaceae	Tree (deciduous)									0.26	0.21													15
954	Chapin & Kedrowski (1983)	10	Sweden						D		Prunus padus	Rosaceae	Tree (deciduous)																							0
955	Chapin & Kedrowski (1983)	10	Sweden						D		Fagus sylvatica	Fagaceae	Tree (deciduous)									0.16	0.13													31
956	Chapin & Kedrowski (1983)	10	Sweden						D		Quercus petrae	Fagaceae	Tree (deciduous)									0.36	0.28													0
957	Chapin & Kedrowski (1983)	10	Sweden						D		Sorbus intermedia	Rosaceae	Tree (deciduous)									0.43	0.31													36
958	Chapin & Kedrowski (1983)	10	Sweden						D		Sorbus aria	Rosaceae	Tree (deciduous)									0.57	0.39													6
959	Chapin & Kedrowski (1983)	10	Sweden						D		Betula pubescens	Betulaceae	Tree (deciduous)									0.26	0.2													39
960	Chapin & Kedrowski (1983)	10	USA	MN					D		Larix laricina	Pinaceae	Conifers							2.15	1.2	0.25	0.25	0.65	0.33											0
961	Chapin & Kedrowski (1983)	10	USA	MN					D		Larix laricina	Pinaceae	Conifers							1.35	0.78	0.25	0.25	0.45	0.23											0
962	Chapin & Kedrowski (1983)	10	USA	MN					D		Larix laricina	Pinaceae	Conifers							1.1	0.45	0.17	0.17	0.55	0.37											0
963	Chapin & Kedrowski (1983)	10	USA	MN					D		Populus tremuloides	Salicaceae	Tree (deciduous)							2.11	0.74	0.18	0.1	0.83	0.34
964	Chapin & Kedrowski (1983)	10	USA	WA					D		Pseudotsuga menziesii	Pinaceae	Conifers							0.96	0.57
965	Chapin & Kedrowski (1983)	10	USA	NH					D		Betula alleghaniensis	Betulaceae	Tree (deciduous)							2.3	1.17	0.17	0.11	0.9	0.49											7
966	Chapin & Kedrowski (1983)	10	USA	NY					D		Quercus alba	Fagaceae	Tree (deciduous)							1	0.51	0.09	0.03	0.69	0.32											0
967	Chapin & Kedrowski (1983)	10	USA	NY					D		Quercus coccinea	Fagaceae	Tree (deciduous)							1.05	0.45	0.06	0.01	0.62	0.24											6
968	Chapin & Kedrowski (1983)	10	USA	NY					D		Pinus rigida	Pinaceae	Conifers							1.2	0.34	0.07	0.01	0.57	0.09											8
969	Chapin & Kedrowski (1983)	10	Poland						D		Pinus sylvestris	Pinaceae	Conifers																							32
970	Chapin & Kedrowski (1983)	10	Poland						D		Carpinus betulus	Betulaceae	Tree (deciduous)																							27
971	Chapin & Kedrowski (1983)	10	Poland						D		Betula verrucosa	Betulaceae	Tree (deciduous)																							0
972	Chapin & Kedrowski (1983)	10	Poland						D		Quercus robur	Fagaceae	Tree (deciduous)																							6
973	Chapin & Kedrowski (1983)	10	Poland						D		Tilia cordata	Malvaceae	Tree (deciduous)																							0
974	Chapin & Kedrowski (1983)	10	Poland						D		Vaccinium myrtillus	Ericaceae	Tree (deciduous)																							6
975	Chapin & Kedrowski (1983)	10	Poland						D		Frangula alnus	Rhamnaceae	Tree (deciduous)																							0
976	Chapin & Kedrowski (1983)	10	Poland						D		Alnus glutinosa	N-fixer Betulaceae	Tree (deciduous)																							0
977	Chapin & Kedrowski (1983)	10	Germany						D		Fagus sylvatica	Fagaceae	Tree (deciduous)							2.2	1.06	0.16	0.1	1.33	0.73											22
978	Chapin & Kedrowski (1983)	10	USA	CA					C		Quercus gambelii	Fagaceae	Tree (deciduous)																							12
979	Chapin & Kedrowski (1983)	10	USA	CA					C		Quercus kelloggii	Fagaceae	Tree (deciduous)																							1
980	Chapin & Kedrowski (1983)	10	USA	TN					C		Pinus taeda	Pinaceae	Conifers							1.2	0.68	0.1	0.04	0.61	0.26											6
981	Chapin & Kedrowski (1983)	10	USA	TN					C		Pinus echinata	Pinaceae	Conifers							1.3	0.51	0.08	0.04	0.77	0.32											53
982	Chapin & Kedrowski (1983)	10	USA	TN					C		Quercus rubra	Fagaceae	Tree (deciduous)							1.8	1.1	0.09	0.07	1	0.76											9
983	Chapin & Kedrowski (1983)	10	USA	TN					C		Quercus alba	Fagaceae	Tree (deciduous)							1.92	1.23	0.1	0.08	1.2	1.09											29
984	Chapin & Kedrowski (1983)	10	USA	TN					C		Quercus prinus	Fagaceae	Tree (deciduous)							1.88	0.79	0.08	0.03	1.03	0.72											16
985	Chapin & Kedrowski (1983)	10	USA	TN					C		Liriodendron tulipifera	Magnoliaceae	Tree (deciduous)							2	1.14	0.11	0.04	1.4	0.66											24
986	Chapin & Kedrowski (1983)	10	USA	TN					C		Acer rubrum	Sapindaceae	Tree (deciduous)							1.8	0.49	0.13	0.03	0.8	0.12											60
987	Chapin & Kedrowski (1983)	10	USA	TN					C		Nyssa sylvatica	Cornaceae	Tree (deciduous)							1.9	0.53	0.13	0.04	1.3	0.64											43
988	Chapin & Kedrowski (1983)	10	USA	TN					C		Oxydendrum arboreum	Ericaceae	Tree (deciduous)							2.02	0.87	0.12	0.09	1.2	0.96											34
989	Chapin & Kedrowski (1983)	10	USA	TN					C		Carya tomentosa	Juglandaceae	Tree (deciduous)							1.98	0.53	0.1	0.03	1.2	0.52											32
990	Chapin & Kedrowski (1983)	10	New Zealand						C		Nothofagus truncata	Fagaceae	Tree (deciduous)							1.4	1.11	0.1	0.1	0.45	0.27											0
991	Chapin & Kedrowski (1983)	10	USA	MS					C		Populus deltoides	Salicaceae	Tree (deciduous)							2.6	0.68	0.18	0.02	1.5	0.35											56
992	Chapin & Kedrowski (1983)	10	Venezuela						A		Genipa caruto	Rubiaceae	Tree (deciduous)							1.8	0.97	0.1	0.05	1.98	0.67
993	Chapin & Kedrowski (1983)	10	Venezuela						A		Luenea candida	Malvaceae	Tree (deciduous)							1.83	0.99	0.15	0.08	3.86	0.77
994	Chapin & Kedrowski (1983)	10	Venezuela						A		Godmania macrocarpa	Bignoniaceae	Tree (deciduous)							1.6	0.77	0.08	0.03	0.65	0.25
995	Chapin & Kedrowski (1983)	10	Venezuela						A		Curatella americana	Dilleniaceae	Tree (evergreen)							0.93	0.46	0.08	0.01	0.83	0.41
996	Chapin & Kedrowski (1983)	10	Venezuela						A		Byrsonima crassifolia	Malpighiaceae	Tree (evergreen)							0.8	0.57	0.04	0.02	0.54	0.14
944	Chapin & Moilanen (1991)	11	USA	AK	Fairbanks	University of Alaska	65.9	-147.8	E		Birches	Betulaceae	Tree (deciduous)		-3	400	200																			24
945	Chapin & Moilanen (1991)	11	USA	AK	Fairbanks	University of Alaska	65.9	-147.8	E		Birches	Betulaceae	Tree (deciduous)		-3	400	200																			22
946	Chapin & Moilanen (1991)	11	USA	AK	Fairbanks	University of Alaska	65.9	-147.8	E		Birches	Betulaceae	Tree (deciduous)		-3	400	200																			11
947	Chapin & Moilanen (1991)	11	USA	AK	Fairbanks	University of Alaska	65.9	-147.8	E		Birches	Betulaceae	Tree (deciduous)		-3	400	200																			1
714	Chapin & Shaver (1989)	12	USA	AK		Toolik Lake	68.5	-149.4	E		Eriophorum vaginatum	Cyperaceae	Graminoid	Picked from the plant	-8	200	760			1.89	0.52	0.24	0.06
715	Chapin & Shaver (1989)	12	USA	AK		Toolik Lake	68.5	-149.4	E		Carex bigelowii	Cyperaceae	Graminoid	Picked from the plant	-8	200	760			2.7	0.68	0.24	0.04
716	Chapin & Shaver (1989)	12	USA	AK		Toolik Lake	68.5	-149.4	E		Calamagrostis canadensis	Poaceae	Graminoid	Picked from the plant	-8	200	760			2.33	1.52	0.28	0.16
717	Chapin & Shaver (1989)	12	USA	AK		Toolik Lake	68.5	-149.4	E		Betula nana	Betulaceae	Tree (deciduous)	Picked from the plant	-8	200	760			2.44	0.92	0.23	0.09													0
718	Chapin & Shaver (1989)	12	USA	AK		Toolik Lake	68.5	-149.4	E		Salix pulchra	Salicaceae	Tree (deciduous)	Picked from the plant	-8	200	760			2.38	0.9	0.19	0.07													15
719	Chapin & Shaver (1989)	12	USA	AK		Toolik Lake	68.5	-149.4	E		Arctostaphylos alpina	Ericaceae	Tree (deciduous)	Picked from the plant	-8	200	760			1.61	0.56	0.25	0.14													0
720	Chapin & Shaver (1989)	12	USA	AK		Toolik Lake	68.5	-149.4	E		Ledum palustre	Ericaceae	Tree (evergreen)	Picked from the plant	-8	200	760			1.41	0.82	0.12	0.07													18
721	Chapin & Shaver (1989)	12	USA	AK		Toolik Lake	68.5	-149.4	E		Empetrum nigrum	Ericaceae	Tree (evergreen)	Picked from the plant	-8	200	760			0.93	0.45	0.08	0.04													46
722	Chapin & Shaver (1989)	12	USA	AK		Toolik Lake	68.5	-149.4	E		Polygonum bistorta	Polygonaceae	Forb	Picked from the plant	-8	200	760			2.94	1.16	0.27	0.07													3
723	Chapin & Shaver (1989)	12	USA	AK		Toolik Lake	68.5	-149.4	E		Petasites frigidus	Asteraceae	Forb	Picked from the plant	-8	200	760			2.38	0.85	0.26	0.06													47
724	Chapin & Shaver (1989)	12	USA	AK		Toolik Lake	68.5	-149.4	E		Epilobium latifolium	Onagraceae	Forb	Picked from the plant	-8	200	760			1.89	0.96	0.26	0.15													0
112	Chuyong et al. 2000	13	Cameroon			Korup National Park	5.2	9	A	Semi-decid rain forest	Strephonema pseudocola	Combretaceae	Tree (evergreen)	Litterfall traps cleared every 2 weeks	26	5200	50			1.19	1.07	0.08	0.05	0.76	0.46	0.93	1.51	0.21	0.2
113	Chuyong et al. 2000	13	Cameroon			Korup National Park	5.2	9	A	Semi-decid rain forest	Klaineanthus gaboniae	Euphorbiaceae	Tree (evergreen)	Litterfall traps cleared every 2 weeks	26	5200	50			2.25	1.55	0.1	0.06	0.74	0.57	0.9	1.07	0.31	0.37
114	Chuyong et al. 2000	13	Cameroon			Korup National Park	5.2	9	A	Semi-decid rain forest	Anthonotha fragrans	N-fixer Fabaceae	Tree (evergreen)	Litterfall traps cleared every 2 weeks	26	5200	50			1.92	1.73	0.14	0.08	0.84	0.7	0.6	0.73	0.24	0.24
115	Chuyong et al. 2000	13	Cameroon			Korup National Park	5.2	9	A	Semi-decid rain forest	Berlinia bracteosa	N-fixer Fabaceae	Tree (evergreen)	Litterfall traps cleared every 2 weeks	26	5200	50			2.2	1.89	0.16	0.14	1.74	1.2	1.66	1.6	0.49	0.38
116	Chuyong et al. 2000	13	Cameroon			Korup National Park	5.2	9	A	Semi-decid rain forest	Didelotia africana	N-fixer Fabaceae	Tree (evergreen)	Litterfall traps cleared every 2 weeks	26	5200	50			1.97	1.85	0.12	0.09	0.66	0.49	0.75	1	0.24	0.23
117	Chuyong et al. 2000	13	Cameroon			Korup National Park	5.2	9	A	Semi-decid rain forest	Hymenostegia afzelii	N-fixer Fabaceae	Tree (deciduous)	Litterfall traps cleared every 2 weeks	26	5200	50			2.89	2.01	0.16	0.09	0.89	0.56	0.62	1.01	0.21	0.25
118	Chuyong et al. 2000	13	Cameroon			Korup National Park	5.2	9	A	Semi-decid rain forest	Microberlinia bisulcata	N-fixer Fabaceae	Tree (deciduous)	Litterfall traps cleared every 2 weeks	26	5200	50			2.23	2.06	0.12	0.09	0.59	0.45	1.32	1.45	0.38	0.33
119	Chuyong et al. 2000	13	Cameroon			Korup National Park	5.2	9	A	Semi-decid rain forest	Tetraberlinia bifoliolata	N-fixer Caesalpiniaceae	Tree (deciduous)	Litterfall traps cleared every 2 weeks	26	5200	50			1.76	1.53	0.1	0.07	0.42	0.22	0.58	0.51	0.14	0.16
120	Chuyong et al. 2000	13	Cameroon			Korup National Park	5.2	9	A	Semi-decid rain forest	Coula edulis	Olacaceae	Tree (evergreen)	Litterfall traps cleared every 2 weeks	26	5200	50			1.78	1.41	0.1	0.06	0.59	0.37	0.31	0.35	0.11	0.14
121	Chuyong et al. 2000	13	Cameroon			Korup National Park	5.2	9	A	Semi-decid rain forest	Oubanguia alata	Scytopetalaceae	Tree (evergreen)	Litterfall traps cleared every 2 weeks	26	5200	50			2.02	1.43	0.12	0.06	1.22	0.66	0.67	0.7	0.3	0.26
122	Chuyong et al. 2000	13	Cameroon			Korup National Park	5.2	9	A	Semi-decid rain forest	Cola verticillata	Malvaceae	Tree (evergreen)	Litterfall traps cleared every 2 weeks	26	5200	50			1.91	1.31	0.11	0.07	0.93	0.68	1.04	0.93	0.38	0.34
73	Corte et al. (2009)	14	Brazil	SP	Campinas		-22.8	-47.1	C		Anacardium occidentale	Anacardiaceae	Tree (deciduous)	Picked from the plant	22.3	1410	670			2.18	1.09									76	66.2	158	136	1200	900	25	13.9
74	Corte et al. (2009)	14	Brazil	SP	Campinas		-22.8	-47.1	C		Bixa orellana	Bixaceae	Tree (evergreen)	Picked from the plant	22.3	1410	670			2.77	1.5									58.8	46.8	204	171	1200	800	33.3	16.2
559	Covelo et al. (2008)	15	Spain	University of Vigo		Control 1996	42.2	-8.7	C	Maritime pine forest	Quercus robur	Fagaceae	Tree (deciduous)	Picked from the plant	15	1800	450			2.2	1.34	0.1	0.06
560	Covelo et al. (2008)	15	Spain	University of Vigo		Harvested 1996	42.2	-8.7	C	Maritime pine forest	Quercus robur	Fagaceae	Tree (deciduous)	Picked from the plant	15	1800	450			1.79	0.91	0.13	0.05
561	Covelo et al. (2008)	15	Spain	University of Vigo		Control 1998	42.2	-8.7	C	Maritime pine forest	Quercus robur	Fagaceae	Tree (deciduous)	Picked from the plant	15	1800	450			2.05	1.86	0.09	0.09
562	Covelo et al. (2008)	15	Spain	University of Vigo		Harvested 1998	42.2	-8.7	C	Maritime pine forest	Quercus robur	Fagaceae	Tree (deciduous)	Picked from the plant	15	1800	450			2.07	1.71	0.1	0.09
563	Covelo et al. (2008)	15	Spain	University of Vigo		Control 1999	42.2	-8.7	C	Maritime pine forest	Quercus robur	Fagaceae	Tree (deciduous)	Picked from the plant	15	1800	450			2.13	1.26	0.11	0.07
564	Covelo et al. (2008)	15	Spain	University of Vigo		Harvested 1999	42.2	-8.7	C	Maritime pine forest	Quercus robur	Fagaceae	Tree (deciduous)	Picked from the plant	15	1800	450			1.88	1.15	0.09	0.05
565	Covelo et al. (2008)	15	Spain	University of Vigo		Control 2000	42.2	-8.7	C	Maritime pine forest	Quercus robur	Fagaceae	Tree (deciduous)	Picked from the plant	15	1800	450			2.84	1.44	0.1	0.03
566	Covelo et al. (2008)	15	Spain	University of Vigo		Harvested 2000	42.2	-8.7	C	Maritime pine forest	Quercus robur	Fagaceae	Tree (deciduous)	Picked from the plant	15	1800	450			2.44	1.37	0.11	0.05
567	Covelo et al. (2008)	15	Spain	University of Vigo			42.2	-8.7	C	Maritime pine forest	Quercus robur	Fagaceae	Tree (deciduous)	Picked from the plant	15	1800	450			2.15	1.57	0.13	0.07
538	Escudero et al. (1992)	16	Spain				41	-5.7	C		Taxus baccata	Taxaceae	Conifers	Litterfall traps cleared monthly	12.5	650	1100			1.08	0.81	0.1	0.07
539	Escudero et al. (1992)	16	Spain				41	-5.7	C		Pinus sylvestris	Pinaceae	Conifers	Litterfall traps cleared monthly	12.5	650	1100			1.03	0.52	0.08	0.04
540	Escudero et al. (1992)	16	Spain				41	-5.7	C		Pinus halepensis	Pinaceae	Conifers	Litterfall traps cleared monthly	12.5	650	1100			1.05	0.62	0.06	0.03
541	Escudero et al. (1992)	16	Spain				41	-5.7	C		Pinus pinea	Pinaceae	Conifers	Litterfall traps cleared monthly	12.5	650	1100			0.99	0.66	0.09	0.06
542	Escudero et al. (1992)	16	Spain				41	-5.7	C		Pinus pinaster	Pinaceae	Conifers	Litterfall traps cleared monthly	12.5	650	1100			0.96	0.55	0.07	0.04
543	Escudero et al. (1992)	16	Spain				41	-5.7	C		Ilex aquifolium	Aquifoliaceae	Tree (evergreen)	Litterfall traps cleared monthly	12.5	650	1100			1.32	0.7	0.07	0.03
544	Escudero et al. (1992)	16	Spain				41	-5.7	C		Quercus rotundifolia	Fagaceae	Tree (evergreen)	Litterfall traps cleared monthly	12.5	650	1100			1.26	0.87	0.07	0.05
545	Escudero et al. (1992)	16	Spain				41	-5.7	C		Quercus coccifera	Fagaceae	Tree (evergreen)	Litterfall traps cleared monthly	12.5	650	1100			1.19	0.82	0.06	0.03
546	Escudero et al. (1992)	16	Spain				41	-5.7	C		Quercus suber	Fagaceae	Tree (evergreen)	Litterfall traps cleared monthly	12.5	650	1100			1.68	0.87	0.13	0.06
547	Escudero et al. (1992)	16	Spain				41	-5.7	C		Salix atrocinerea	Salicaceae	Tree (deciduous)	Litterfall traps cleared monthly	12.5	650	1100			1.8	1.13	0.2	0.09
548	Escudero et al. (1992)	16	Spain				41	-5.7	C		Populus nigra	Salicaceae	Tree (deciduous)	Litterfall traps cleared monthly	12.5	650	1100			1.81	0.67	0.16	0.04
549	Escudero et al. (1992)	16	Spain				41	-5.7	C		Quercus faginea	Fagaceae	Tree (deciduous)	Litterfall traps cleared monthly	12.5	650	1100			1.91	1.05	0.13	0.07
550	Escudero et al. (1992)	16	Spain				41	-5.7	C		Frangula alnus	Rhamnaceae	Tree (deciduous)	Litterfall traps cleared monthly	12.5	650	1100			2.98	1.13	0.09	0.03
551	Escudero et al. (1992)	16	Spain				41	-5.7	C		Betula pubescens	Betulaceae	Tree (deciduous)	Litterfall traps cleared monthly	12.5	650	1100			2.11	0.65	0.11	0.03
552	Escudero et al. (1992)	16	Spain				41	-5.7	C		Sambucus nigra	Adoxaceae	Tree (deciduous)	Litterfall traps cleared monthly	12.5	650	1100			3.81	1.91	0.31	0.21
553	Escudero et al. (1992)	16	Spain				41	-5.7	C		Acer monspessulanum	Sapindaceae	Tree (deciduous)	Litterfall traps cleared monthly	12.5	650	1100			1.98	1.15	0.11	0.05
554	Escudero et al. (1992)	16	Spain				41	-5.7	C		Quercus pyrenaica	Fagaceae	Tree (deciduous)	Litterfall traps cleared monthly	12.5	650	1100			1.85	0.98	0.13	0.06
555	Escudero et al. (1992)	16	Spain				41	-5.7	C		Crataegus monogyna	Rosaceae	Tree (deciduous)	Litterfall traps cleared monthly	12.5	650	1100			1.62	1.02	0.15	0.09
556	Escudero et al. (1992)	16	Spain				41	-5.7	C		Fraxinus angustifolia	Oleaceae	Tree (deciduous)	Litterfall traps cleared monthly	12.5	650	1100			2.33	1.4	0.19	0.09
557	Escudero et al. (1992)	16	Spain				41	-5.7	C		Pyrus bourgaeana	Rosaceae	Tree (deciduous)	Litterfall traps cleared monthly	12.5	650	1100			1.72	0.88	0.12	0.06
558	Escudero et al. (1992)	16	Spain				41	-5.7	C		Prunus spinosa	Rosaceae	Tree (deciduous)	Litterfall traps cleared monthly	12.5	650	1100			2.07	1.57	0.14	0.09
70	Feller et al. (2003)	17	Belize			Fringe	16.8	-88.1	A	Mangrove forest	Rhizophora mangle	Rhizophoraceae	Tree (evergreen)	Picked from the plant	25	2218	0			0.89	0.28	0.06	0.01
71	Feller et al. (2003)	17	Belize			Transition	16.8	-88.1	A	Mangrove forest	Rhizophora mangle	Rhizophoraceae	Tree (evergreen)	Picked from the plant	25	2218	0			0.91	0.32	0.05	0.01
72	Feller et al. (2003)	17	Belize			Dwarf	16.8	-88.1	A	Mangrove forest	Rhizophora mangle	Rhizophoraceae	Tree (evergreen)	Picked from the plant	25	2218	0			0.96	0.49	0.04	0.01
725	Finzi et al. (2001)	18	USA	NC	Durham	FACE - 1997	36	-79.8	C		Cercis canadensis	N-fixer Fabaceae	Tree (deciduous)	Recently fallen leaves	15.5	1140	123			2.36	1.01	0.13	0.05
726	Finzi et al. (2001)	18	USA	NC	Durham	FACE - 1997	36	-79.8	C		Cornus florida	Cornaceae	Tree (deciduous)	Recently fallen leaves	15.5	1140	123			1.51	0.9	0.11	0.07
727	Finzi et al. (2001)	18	USA	NC	Durham	FACE - 1997	36	-79.8	C		Pinus taeda	Pinaceae	Conifers	Recently fallen leaves	15.5	1140	123			0.93	0.47	0.08	0.04
728	Finzi et al. (2001)	18	USA	NC	Durham	FACE - 1997	36	-79.8	C		Cercis canadensis	N-fixer Fabaceae	Tree (deciduous)	Recently fallen leaves	15.5	1140	123			2.09	1	0.11	0.07
729	Finzi et al. (2001)	18	USA	NC	Durham	FACE - 1997	36	-79.8	C		Cornus florida	Cornaceae	Tree (deciduous)	Recently fallen leaves	15.5	1140	123			1.4	0.67	0.1	0.06
730	Finzi et al. (2001)	18	USA	NC	Durham	FACE - 1997	36	-79.8	C		Pinus taeda	Pinaceae	Conifers	Recently fallen leaves	15.5	1140	123			0.87	0.49	0.08	0.04
731	Finzi et al. (2001)	18	USA	NC	Durham	FACE - 1998	36	-79.8	C		Cercis canadensis	N-fixer Fabaceae	Tree (deciduous)	Recently fallen leaves	15.5	1140	123			2.66	1.13	0.14	0.05
732	Finzi et al. (2001)	18	USA	NC	Durham	FACE - 1998	36	-79.8	C		Cornus florida	Cornaceae	Tree (deciduous)	Recently fallen leaves	15.5	1140	123			1.59	0.96	0.11	0.06
733	Finzi et al. (2001)	18	USA	NC	Durham	FACE - 1998	36	-79.8	C		Acer rubrum	Sapindaceae	Tree (deciduous)	Recently fallen leaves	15.5	1140	123			1.58	0.74	0.12	0.04
734	Finzi et al. (2001)	18	USA	NC	Durham	FACE - 1998	36	-79.8	C		Liquidambar styraciflua	Altingiaceae	Tree (deciduous)	Recently fallen leaves	15.5	1140	123			1.61	0.71	0.13	0.05
735	Finzi et al. (2001)	18	USA	NC	Durham	FACE - 1998	36	-79.8	C		Pinus taeda	Pinaceae	Conifers	Recently fallen leaves	15.5	1140	123			0.85	0.49	0.08	0.03
736	Finzi et al. (2001)	18	USA	NC	Durham	FACE - 1998	36	-79.8	C		Cercis canadensis	N-fixer Fabaceae	Tree (deciduous)	Recently fallen leaves	15.5	1140	123			2.22	1.14	0.13	0.07
737	Finzi et al. (2001)	18	USA	NC	Durham	FACE - 1998	36	-79.8	C		Cornus florida	Cornaceae	Tree (deciduous)	Recently fallen leaves	15.5	1140	123			1.63	0.71	0.11	0.06
738	Finzi et al. (2001)	18	USA	NC	Durham	FACE - 1998	36	-79.8	C		Acer rubrum	Sapindaceae	Tree (deciduous)	Recently fallen leaves	15.5	1140	123			1.54	0.7	0.13	0.06
739	Finzi et al. (2001)	18	USA	NC	Durham	FACE - 1998	36	-79.8	C		Liquidambar styraciflua	Altingiaceae	Tree (deciduous)	Recently fallen leaves	15.5	1140	123			1.4	0.64	0.11	0.06
740	Finzi et al. (2001)	18	USA	NC	Durham	FACE - 1998	36	-79.8	C		Pinus taeda	Pinaceae	Conifers	Recently fallen leaves	15.5	1140	123			0.83	0.5	0.09	0.04
469	Fioreto et al. (2003)	19	Italy			Natural Reserve of Castel Volturno	41	13.9	C	Mediterranean shrubland	Myrtus communis	Myrtaceae	Tree (evergreen)	Picked from the plant	18.6	680	7	52	49.2	1.67	0.78	0.1	0.06	0.66	0.39	0.84	1.07	0.2	0.26
470	Fioreto et al. (2003)	19	Italy			Natural Reserve of Castel Volturno	41	13.9	C	Mediterranean shrubland	Cistus incanus	Cistaceae	Tree (evergreen)	Picked from the plant	18.6	680	7	50.7	47.9	2.36	1.01	0.18	0.07	0.87	0.58	0.91	1.17	0.14	0.12
796	Flanagan & van Cleve (1983)	20	USA	AK	Fairbanks		64.9	-147.7	D		Betula papyrifera	Betulaceae	Tree (deciduous)	Picked from the plant	-3	400	162			2.1	1.4	0.22	0.22													18
797	Flanagan & van Cleve (1983)	20	USA	AK	Lake Minchumina		63.9	-152.3	D		Betula papyrifera	Betulaceae	Tree (deciduous)	Picked from the plant	-3	400	162			1.9	0.5	0.15	0.09													28
529	Fonte & Schowalter (2004)	21	Puerto Rico	Luquillo Experimental Forest		El Verde Field Station	18.2	-65.5	A	Subtropical wet forest	Cecropia schreberiana	Urticaceae	Tree (evergreen)	Recently fallen leaves	23	3700	400	43.47	42.83	2.2	0.99
530	Fonte & Schowalter (2004)	21	Puerto Rico	Luquillo Experimental Forest		El Verde Field Station	18.2	-65.5	A	Subtropical wet forest	Dacryodes excelsa	Burseraceae	Tree (evergreen)	Recently fallen leaves	23	3700	400	45.31	43.4	1.3	0.53
531	Fonte & Schowalter (2004)	21	Puerto Rico	Luquillo Experimental Forest		El Verde Field Station	18.2	-65.5	A	Subtropical wet forest	Guarea guidonia	Meliaceae	Tree (evergreen)	Recently fallen leaves	23	3700	400	46.54	47.56	2.96	1.23
532	Fonte & Schowalter (2004)	21	Puerto Rico	Luquillo Experimental Forest		El Verde Field Station	18.2	-65.5	A	Subtropical wet forest	Manilkara bidentata	Sapotaceae	Tree (evergreen)	Recently fallen leaves	23	3700	400	45.15	48.95	0.93	0.48
602	Freschet et al (2010)	22	Sweden			Abisko Scientific Research Station	68.4	18.8	D		Alnus incana	N-fixer Betulaceae	Tree (deciduous)	Picked from the plant or recently fallen	-0.8	352	375			0.22	0.15	0.03	0
603	Freschet et al (2010)	22	Sweden			Abisko Scientific Research Station	68.4	18.8	D		Angelica archangelica	Apiacea	Forb	Picked from the plant or recently fallen	-0.8	352	375			0.23	0.08	0.02	0.01
604	Freschet et al (2010)	22	Sweden			Abisko Scientific Research Station	68.4	18.8	D		Betula nana	Betulaceae	Tree (deciduous)	Picked from the plant or recently fallen	-0.8	352	375			0.19	0.04	0.04	0.01
605	Freschet et al (2010)	22	Sweden			Abisko Scientific Research Station	68.4	18.8	D		Betula pubescens	Betulaceae	Tree (deciduous)	Picked from the plant or recently fallen	-0.8	352	375			0.19	0.04	0.02	0.01
606	Freschet et al (2010)	22	Sweden			Abisko Scientific Research Station	68.4	18.8	D		Calamagrostis lapponica	Poaceae	Graminoid	Picked from the plant or recently fallen	-0.8	352	375			0.17	0.05	0.03	0.01
607	Freschet et al (2010)	22	Sweden			Abisko Scientific Research Station	68.4	18.8	D		Carex rostrata	Cyperaceae	Graminoid	Picked from the plant or recently fallen	-0.8	352	375			0.18	0.06	0.03	0.01
608	Freschet et al (2010)	22	Sweden			Abisko Scientific Research Station	68.4	18.8	D		Comarum palustre	Rosaceae	Forb	Picked from the plant or recently fallen	-0.8	352	375			0.13	0.03	0.02	0
609	Freschet et al (2010)	22	Sweden			Abisko Scientific Research Station	68.4	18.8	D		Cornus suecica	Cornaceae	Forb	Picked from the plant or recently fallen	-0.8	352	375			0.18	0.04	0.02	0.01
610	Freschet et al (2010)	22	Sweden			Abisko Scientific Research Station	68.4	18.8	D		Deschampsia cespitosa	Poaceae	Graminoid	Picked from the plant or recently fallen	-0.8	352	375			0.13	0.03	0.01	0
611	Freschet et al (2010)	22	Sweden			Abisko Scientific Research Station	68.4	18.8	D		Deschampsia flexuosa	Poaceae	Graminoid	Picked from the plant or recently fallen	-0.8	352	375			0.23	0.03	0.01	0.01
612	Freschet et al (2010)	22	Sweden			Abisko Scientific Research Station	68.4	18.8	D		Empetrum nigrum	Ericaceae	Tree (evergreen)	Picked from the plant or recently fallen	-0.8	352	375			0.11	0.03	0.01	0
613	Freschet et al (2010)	22	Sweden			Abisko Scientific Research Station	68.4	18.8	D		Epilobium angustifolium	Onagraceae	Forb	Picked from the plant or recently fallen	-0.8	352	375			0.12	0.04	0.02	0.01
614	Freschet et al (2010)	22	Sweden			Abisko Scientific Research Station	68.4	18.8	D		Equisetum fluviatile	Equisetaceae	Ferns	Picked from the plant or recently fallen	-0.8	352	375			0.15	0.14	0.04	0.01
615	Freschet et al (2010)	22	Sweden			Abisko Scientific Research Station	68.4	18.8	D		Equisetum palustre	Equisetaceae	Ferns	Picked from the plant or recently fallen	-0.8	352	375			0.33	0.07	0.03	0
616	Freschet et al (2010)	22	Sweden			Abisko Scientific Research Station	68.4	18.8	D		Equisetum sylvaticum	Equisetaceae	Ferns	Picked from the plant or recently fallen	-0.8	352	375			0.18	0.06	0.02	0.01
617	Freschet et al (2010)	22	Sweden			Abisko Scientific Research Station	68.4	18.8	D		Filipendula ulmaria	Rosaceae	Forb	Picked from the plant or recently fallen	-0.8	352	375			0.33	0.05	0.02	0
618	Freschet et al (2010)	22	Sweden			Abisko Scientific Research Station	68.4	18.8	D		Geranium sylvaticum	Geraniaceae	Forb	Picked from the plant or recently fallen	-0.8	352	375			0.22	0.04	0.02	0
619	Freschet et al (2010)	22	Sweden			Abisko Scientific Research Station	68.4	18.8	D		Juniperus communis	Cupressaceae	Conifers	Picked from the plant or recently fallen	-0.8	352	375			0.09	0.03	0.01	0
620	Freschet et al (2010)	22	Sweden			Abisko Scientific Research Station	68.4	18.8	D		Lycopodium annotinum	Lycopodiaceae	Ferns	Picked from the plant or recently fallen	-0.8	352	375			0.11	0.02	0.01	0
621	Freschet et al (2010)	22	Sweden			Abisko Scientific Research Station	68.4	18.8	D		Pinus sylvestris	Pinaceae	Conifers	Picked from the plant or recently fallen	-0.8	352	375			0.08	0.04	0.01	0.01
622	Freschet et al (2010)	22	Sweden			Abisko Scientific Research Station	68.4	18.8	D		Populus tremula	Salicaceae	Tree (deciduous)	Picked from the plant or recently fallen	-0.8	352	375			0.22	0.04	0.02	0.01
623	Freschet et al (2010)	22	Sweden			Abisko Scientific Research Station	68.4	18.8	D		Prunus padus	Rosaceae	Tree (deciduous)	Picked from the plant or recently fallen	-0.8	352	375			0.2	0.05	0.01	0
624	Freschet et al (2010)	22	Sweden			Abisko Scientific Research Station	68.4	18.8	D		Ribes spicatum	Grossulariaceae	Tree (deciduous)	Picked from the plant or recently fallen	-0.8	352	375			0.24	0.05	0.01	0.01
625	Freschet et al (2010)	22	Sweden			Abisko Scientific Research Station	68.4	18.8	D		Rubus saxatilis	Rosaceae	Forb	Picked from the plant or recently fallen	-0.8	352	375			0.16	0.08	0.02	0.01
626	Freschet et al (2010)	22	Sweden			Abisko Scientific Research Station	68.4	18.8	D		Salix caprea	Salicaceae	Tree (deciduous)	Picked from the plant or recently fallen	-0.8	352	375			0.25	0.09	0.02	0
627	Freschet et al (2010)	22	Sweden			Abisko Scientific Research Station	68.4	18.8	D		Salix lapponum	Salicaceae	Tree (deciduous)	Picked from the plant or recently fallen	-0.8	352	375			0.18	0.07	0.02	0.01
628	Freschet et al (2010)	22	Sweden			Abisko Scientific Research Station	68.4	18.8	D		Salix phylicifolia	Salicaceae	Tree (deciduous)	Picked from the plant or recently fallen	-0.8	352	375			0.2	0.05	0.02	0.01
629	Freschet et al (2010)	22	Sweden			Abisko Scientific Research Station	68.4	18.8	D		Saussurea alpina	Asteraceae	Forb	Picked from the plant or recently fallen	-0.8	352	375			0.2	0.06	0.01	0
630	Freschet et al (2010)	22	Sweden			Abisko Scientific Research Station	68.4	18.8	D		Sorbus aucuparia	Rosaceae	Tree (deciduous)	Picked from the plant or recently fallen	-0.8	352	375			0.21	0.05	0.01	0
631	Freschet et al (2010)	22	Sweden			Abisko Scientific Research Station	68.4	18.8	D		Trientalis europaea	Myrsinaceae	Forb	Picked from the plant or recently fallen	-0.8	352	375			0.13	0.04	0.01	0.01
632	Freschet et al (2010)	22	Sweden			Abisko Scientific Research Station	68.4	18.8	D		Trollius europaeus	Ranunculaceae	Forb	Picked from the plant or recently fallen	-0.8	352	375			0.2	0.04	0.01	0
633	Freschet et al (2010)	22	Sweden			Abisko Scientific Research Station	68.4	18.8	D		Vaccinium myrtillus	Ericaceae	Tree (deciduous)	Picked from the plant or recently fallen	-0.8	352	375			0.15	0.05	0.02	0.01
634	Freschet et al (2010)	22	Sweden			Abisko Scientific Research Station	68.4	18.8	D		Vaccinium uliginosum	Ericaceae	Tree (deciduous)	Picked from the plant or recently fallen	-0.8	352	375			0.17	0.04	0.04	0.03
635	Freschet et al (2010)	22	Sweden			Abisko Scientific Research Station	68.4	18.8	D		Vaccinium vitis-idea	Ericaceae	Tree (evergreen)	Picked from the plant or recently fallen	-0.8	352	375			0.11	0.04	0.02	0.01
568	Gallardo et al. (1999)	23	Spain	Province of Salamanca	El Rebollar district	Fuenteguinaldo	40.3	-6.7	C		Quercus pyrenaica	Fagaceae	Tree (deciduous)	Litterfall	12.9	720	870			1.26	1.31	0.16	0.12	0.54	0.26	0.77	0.83	0.2	0.22
569	Gallardo et al. (1999)	23	Spain	Province of Salamanca	El Rebollar district	Villasrubias	40.3	-6.7	C		Quercus pyrenaica	Fagaceae	Tree (deciduous)	Litterfall	10	872	900			1.49	1.01	0.16	0.07	0.81	0.22	0.49	0.52	0.21	0.24
570	Gallardo et al. (1999)	23	Spain	Province of Salamanca	El Rebollar district	El Payo	40.3	-6.7	C		Quercus pyrenaica	Fagaceae	Tree (deciduous)	Litterfall	8.1	1245	940			1.37	1.5	0.12	0.09	0.74	0.27	0.51	0.57	0.18	0.19
571	Gallardo et al. (1999)	23	Spain	Province of Salamanca	El Rebollar district	Navasfrias	40.3	-6.7	C		Quercus pyrenaica	Fagaceae	Tree (deciduous)	Litterfall	10.4	1580	960			1.7	1.4	0.11	0.06	0.36	0.22	0.7	0.69	0.17	0.21
906	Gusewell (2005)	24	Swiss		Zurich		47.4	8.7	C	Wet meadows - Molinion	Carex acutiformis	Cyperaceae	Graminoid		7.9	1144	500			1.72	0.55	0.08	0.01													30.2	8.7
907	Gusewell (2005)	24	Swiss		Zurich		47.4	8.7	C	Wet meadows - Molinion	Carex elata	Cyperaceae	Graminoid		7.9	1144	500			1.83	0.71	0.08	0.01													27.1	16
908	Gusewell (2005)	24	Swiss		Zurich		47.4	8.7	C	Wet meadows - Molinion	Carex flacca	Cyperaceae	Graminoid		7.9	1144	500			1.61	0.51	0.11	0.02													25.2	6.1
909	Gusewell (2005)	24	Swiss		Zurich		47.4	8.7	C	Wet meadows - Molinion	Carex flava	Cyperaceae	Graminoid		7.9	1144	500			1.99	0.71	0.12	0.03													28	5.7
910	Gusewell (2005)	24	Swiss		Zurich		47.4	8.7	C	Wet meadows - Molinion	Carex panicea	Cyperaceae	Graminoid		7.9	1144	500			1.72	0.47	0.08	0.01													33.8	19.3
911	Gusewell (2005)	24	Swiss		Zurich		47.4	8.7	C	Wet meadows - Molinion	Molinia caerulea	Poaceae	Graminoid		7.9	1144	500			1.85	0.39	0.08	0.01													20.3	7.2
912	Gusewell (2005)	24	Swiss		Zurich		47.4	8.7	C	Wet meadows - Molinion	Carex acutiformis	Cyperaceae	Graminoid		7.9	1144	500			1.1	0.52	0.06	0.01
913	Gusewell (2005)	24	Swiss		Zurich		47.4	8.7	C	Wet meadows - Molinion	Carex elata	Cyperaceae	Graminoid		7.9	1144	500			1.03	0.63	0.04	0.01
914	Gusewell (2005)	24	Swiss		Zurich		47.4	8.7	C	Wet meadows - Molinion	Carex flacca	Cyperaceae	Graminoid		7.9	1144	500			1.24	0.43	0.11	0.02
915	Gusewell (2005)	24	Swiss		Zurich		47.4	8.7	C	Wet meadows - Molinion	Carex flava	Cyperaceae	Graminoid		7.9	1144	500			1.22	0.67	0.1	0.03
916	Gusewell (2005)	24	Swiss		Zurich		47.4	8.7	C	Wet meadows - Molinion	Carex panicea	Cyperaceae	Graminoid		7.9	1144	500			1.17	0.44	0.07	0.01
917	Gusewell (2005)	24	Swiss		Zurich		47.4	8.7	C	Wet meadows - Molinion	Molinia caerulea	Poaceae	Graminoid		7.9	1144	500			1.26	0.4	0.06	0.01
336	Helmisaari (1992)	25	Finland	Ilomantsi	Mekrijarvi Research Station	Sapling plot 1983	62.8	31	D	Regenerated Pinus sylvestris stands	Pinus sylvestris	Pinaceae	Conifers	Litterfall traps cleared every week	2	600	145			0.83	0.31	0.07	0.02	0.23	0.03	0.5	0.48	0.04	0.03					10.4	6.4	38.9
337	Helmisaari (1992)	25	Finland	Ilomantsi	Mekrijarvi Research Station	Sapling plot 1986	62.8	31	D	Regenerated Pinus sylvestris stands	Pinus sylvestris	Pinaceae	Conifers	Litterfall traps cleared every week	2	600	145			0.79	0.39	0.08	0.02	0.24	0.06	0.42	0.54	0.05	0.05					10.1	7.8	22.5
338	Helmisaari (1992)	25	Finland	Ilomantsi	Mekrijarvi Research Station	Sapling plot 1987	62.8	31	D	Regenerated Pinus sylvestris stands	Pinus sylvestris	Pinaceae	Conifers	Litterfall traps cleared every week	2	600	145			0.92	0.36	0.08	0.02	0.27	0.05	0.35	0.54	0.06	0.05					9.9	6.4	34.9
339	Helmisaari (1992)	25	Finland	Ilomantsi	Mekrijarvi Research Station	Pole stage plot 1983	62.8	31	D	Regenerated Pinus sylvestris stands	Pinus sylvestris	Pinaceae	Conifers	Litterfall traps cleared every week	2	600	145			0.94	0.33	0.09	0.02	0.27	0.04	0.37	0.35	0.06	0.04					15	7.5	49.8
340	Helmisaari (1992)	25	Finland	Ilomantsi	Mekrijarvi Research Station	Pole stage plot 1984	62.8	31	D	Regenerated Pinus sylvestris stands	Pinus sylvestris	Pinaceae	Conifers	Litterfall traps cleared every week	2	600	145			0.86	0.4	0.08	0.03	0.27	0.08	0.33	0.44	0.05	0.05					14.6	9.4	35.3
341	Helmisaari (1992)	25	Finland	Ilomantsi	Mekrijarvi Research Station	Pole stage plot 1986	62.8	31	D	Regenerated Pinus sylvestris stands	Pinus sylvestris	Pinaceae	Conifers	Litterfall traps cleared every week	2	600	145			0.77	0.38	0.08	0.03	0.27	0.06	0.39	0.42	0.06	0.05					15.1	7.4	50.9
342	Helmisaari (1992)	25	Finland	Ilomantsi	Mekrijarvi Research Station	Pole stage plot 1987	62.8	31	D	Regenerated Pinus sylvestris stands	Pinus sylvestris	Pinaceae	Conifers	Litterfall traps cleared every week	2	600	145			0.92	0.39	0.09	0.03	0.3	0.07	0.34	0.4	0.09	0.05					11.3	8.2	27.1
343	Helmisaari (1992)	25	Finland	Ilomantsi	Mekrijarvi Research Station	Mature plot 1983	62.8	31	D	Regenerated Pinus sylvestris stands	Pinus sylvestris	Pinaceae	Conifers	Litterfall traps cleared every week	2	600	145			0.93	0.4	0.08	0.03	0.27	0.08	0.29	0.31	0.07	0.07					13.5	8.8	34.8
344	Helmisaari (1992)	25	Finland	Ilomantsi	Mekrijarvi Research Station	Mature plot 1984	62.8	31	D	Regenerated Pinus sylvestris stands	Pinus sylvestris	Pinaceae	Conifers	Litterfall traps cleared every week	2	600	145			0.91	0.39	0.08	0.03	0.25	0.09	0.31	0.41	0.08	0.08					15	10.3	31.4
345	Helmisaari (1992)	25	Finland	Ilomantsi	Mekrijarvi Research Station	Mature plot 1985	62.8	31	D	Regenerated Pinus sylvestris stands	Pinus sylvestris	Pinaceae	Conifers	Litterfall traps cleared every week	2	600	145			0.91	0.39	0.11	0.02	0.31	0.08	0.3	0.38	0.1	0.08					11.9	8.6	27.7
346	Helmisaari (1992)	25	Finland	Ilomantsi	Mekrijarvi Research Station	Mature plot 1986	62.8	31	D	Regenerated Pinus sylvestris stands	Pinus sylvestris	Pinaceae	Conifers	Litterfall traps cleared every week	2	600	145			1.18	0.4	0.12	0.03	0.38	0.09	0.33	0.38	0.1	0.08					9.9	7.4	24.8
347	Helmisaari (1992)	25	Finland	Ilomantsi	Mekrijarvi Research Station	Mature plot 1987	62.8	31	D	Regenerated Pinus sylvestris stands	Pinus sylvestris	Pinaceae	Conifers	Litterfall traps cleared every week	2	600	145			1.07	0.39	0.12	0.03	0.3	0.1	0.31	0.39	0.09	0.08					10.2	8.2	18.9
849	Herrick & Thomas (2003)	26	USA	NC	Durham	Duke forest FACE	36	-79.1	C		Liquidambar styraciflua	Altingiaceae	Tree (deciduous)		15.5	1140	123			0.73	0.29									58.3	49.3
850	Herrick & Thomas (2003)	26	USA	NC	Durham	Duke forest FACE	36	-79.1	C		Liquidambar styraciflua	Altingiaceae	Tree (deciduous)		15.5	1140	123			0.78	0.31									36.6	36
163	Hevia et al. (1999)	27	Chile	Region VII	Las Trancas		-34	-71.4	C		Nothofagus dombeyi	Fagaceae	Tree (evergreen)	Picked from the plant	5	2500	1600			1.27	0.62	0.09	0.04							133.9	153.6
164	Hevia et al. (1999)	27	Chile	Region VII	Las Trancas		-34	-71.4	C		Nothofagus pumilio	Fagaceae	Tree (deciduous)	Picked from the plant	5	2500	1600			1.75	0.66	0.16	0.1							66.9	66.1
165	Hevia et al. (1999)	27	Chile	Region VII	Las Trancas		-34	-71.4	C		Nothofagus obliqua	Fagaceae	Tree (deciduous)	Picked from the plant	5	2500	1600			2	0.55	0.13	0.16							77.5	62.6
689	Hobbie & Gough (2002)	28	USA	AK		Acidic	68.4	-149.4	E		Betula nana	Betulaceae	Tree (deciduous)	Picked from the plant	-2.9	263	760			1.72	0.95	0.24	0.11	0.54	0.37	0.42	0.48	0.28	0.28	84
690	Hobbie & Gough (2002)	28	USA	AK		Non-acidic	68.4	-149.4	E		Betula nana	Betulaceae	Tree (deciduous)	Picked from the plant	-2.9	263	760			1.81	0.92	0.21	0.12	0.77	0.69	0.66	1.01	0.25	0.25	80.4
691	Hobbie & Gough (2002)	28	USA	AK		Acidic	68.4	-149.4	E		Carex bigelowii	Cyperaceae	Graminoid	Picked from the plant	-2.9	263	760			1.88	0.69	0.16	0.04	1.38	0.59	0.21	0.38	0.09	0.12	179.2
692	Hobbie & Gough (2002)	28	USA	AK		Non-acidic	68.4	-149.4	E		Carex bigelowii	Cyperaceae	Graminoid	Picked from the plant	-2.9	263	760			1.82	0.74	0.12	0.03	1.18	0.38	0.72	0.99	0.16	0.13	146.6
693	Hobbie & Gough (2002)	28	USA	AK		Acidic	68.4	-149.4	E		Eriophorum vaginatum	Cyperaceae	Graminoid	Picked from the plant	-2.9	263	760			1.77	0.53	0.18	0.04	0.71	0.18	0.11	0.27	0.1	0.07	217.9
694	Hobbie & Gough (2002)	28	USA	AK		Non-acidic	68.4	-149.4	E		Eriophorum vaginatum	Cyperaceae	Graminoid	Picked from the plant	-2.9	263	760			1.8	0.6	0.16	0.04	0.79	0.22	0.23	0.4	0.07	0.07	208.3
695	Hobbie & Gough (2002)	28	USA	AK		Acidic	68.4	-149.4	E		Rubus chamaemorus	Rosaceae	Forb	Picked from the plant	-2.9	263	760			1.84	1.11	0.13	0.07	0.99	0.52	0.61	0.75	0.66	0.6	97.1
696	Hobbie & Gough (2002)	28	USA	AK		Non-acidic	68.4	-149.4	E		Dryas integrifolia	N-fixer Rosaceae	Tree (deciduous)	Picked from the plant	-2.9	263	760			1.23	0.41	0.1	0.04	0.59	0.22	1.89	2.84	0.15	0.2	198.8
697	Hobbie & Gough (2002)	28	USA	AK		Acidic	68.4	-149.4	E		Ledum palustre	Ericaceae	Tree (evergreen)	Picked from the plant	-2.9	263	760			1.49	0.38	0.14	0.03	0.57	0.38	0.44	0.73	0.13	0.1	207.5
698	Hobbie & Gough (2002)	28	USA	AK		Non-acidic	68.4	-149.4	E		Ledum palustre	Ericaceae	Tree (evergreen)	Picked from the plant	-2.9	263	760			1.39	0.31									261.1
699	Hobbie & Gough (2002)	28	USA	AK		Acidic	68.4	-149.4	E		Vaccinium vitis-idaea	Ericaceae	Tree (evergreen)	Picked from the plant	-2.9	263	760			1.12	0.43	0.11	0.03	0.56	0.24	0.29	0.67	0.12	0.08	164.2
700	Hobbie & Gough (2002)	28	USA	AK		Non-acidic	68.4	-149.4	E		Vaccinium vitis-idaea	Ericaceae	Tree (evergreen)	Picked from the plant	-2.9	263	760			0.84	0.31	0.09	0.03	0.45	0.22	0.43	0.97	0.1	0.07	153.4
701	Hobbie & Gough (2002)	28	USA	AK		Acidic	68.4	-149.4	E		Polygonum bistorta	Polygonaceae	Forb	Picked from the plant	-2.9	263	760			2.83	1.34	0.22	0.08	1.73	0.71	0.44	0.6	0.34	0.39	98.1
702	Hobbie & Gough (2002)	28	USA	AK		Non-acidic	68.4	-149.4	E		Polygonum bistorta	Polygonaceae	Forb	Picked from the plant	-2.9	263	760			1.64	0.78	0.13	0.04	1.22	0.37	1.43	1.77	0.54	0.56	111
269	Huang et al. (2007)	29	China	Zhejiang Province		Tiantong Natinal Forest Park	29.9	121.7	C	Subtropical everg broad-leaved forest	Castanea mollissima	Fagaceae	Tree (deciduous)	Picked from plants + litterfall traps	16.2	1375	200			2.29	1.54	0.15	0.03							47.6
270	Huang et al. (2007)	29	China	Zhejiang Province		Tiantong Natinal Forest Park	29.9	121.7	C	Subtropical everg broad-leaved forest	Quercus fabri	Fagaceae	Tree (deciduous)	Picked from plants + litterfall traps	16.2	1375	200			2.26	1.46	0.13	0.03							62.9
271	Huang et al. (2007)	29	China	Zhejiang Province		Tiantong Natinal Forest Park	29.9	121.7	C	Subtropical everg broad-leaved forest	Liquidambar formosana	Altingiaceae	Tree (deciduous)	Picked from plants + litterfall traps	16.2	1375	200			1.84	0.64	0.1	0.04							53.2
272	Huang et al. (2007)	29	China	Zhejiang Province		Tiantong Natinal Forest Park	29.9	121.7	C	Subtropical everg broad-leaved forest	Lindera glauca	Lauraceae	Tree (deciduous)	Picked from plants + litterfall traps	16.2	1375	200			2.64	1.63	0.14	0.09							34.1
273	Huang et al. (2007)	29	China	Zhejiang Province		Tiantong Natinal Forest Park	29.9	121.7	C	Subtropical everg broad-leaved forest	Litsea cubeba	Lauraceae	Tree (deciduous)	Picked from plants + litterfall traps	16.2	1375	200			3.63	2.5	0.13	0.07							29.2
274	Huang et al. (2007)	29	China	Zhejiang Province		Tiantong Natinal Forest Park	29.9	121.7	C	Subtropical everg broad-leaved forest	Sassafras izumu	Lauraceae	Tree (deciduous)	Picked from plants + litterfall traps	16.2	1375	200			1.95	1.42	0.11	0.06							61.3
275	Huang et al. (2007)	29	China	Zhejiang Province		Tiantong Natinal Forest Park	29.9	121.7	C	Subtropical everg broad-leaved forest	Ficus erecta	Moraceae	Tree (deciduous)	Picked from plants + litterfall traps	16.2	1375	200			2.94	1.73	0.16	0.09							43.3
276	Huang et al. (2007)	29	China	Zhejiang Province		Tiantong Natinal Forest Park	29.9	121.7	C	Subtropical everg broad-leaved forest	Elaeocarpus decipiens	Elaeocarpaceae	Tree (evergreen)	Picked from plants + litterfall traps	16.2	1375	200			2.24	1.07	0.18	0.08							70.9
277	Huang et al. (2007)	29	China	Zhejiang Province		Tiantong Natinal Forest Park	29.9	121.7	C	Subtropical everg broad-leaved forest	Castanopsis sclerophylla	Fagaceae	Tree (evergreen)	Picked from plants + litterfall traps	16.2	1375	200			1.48	0.86	0.1	0.05							84
278	Huang et al. (2007)	29	China	Zhejiang Province		Tiantong Natinal Forest Park	29.9	121.7	C	Subtropical everg broad-leaved forest	Cyclobalanopsis glauca	Fagaceae	Tree (evergreen)	Picked from plants + litterfall traps	16.2	1375	200			1.44	0.92	0.1	0.05							70.9
279	Huang et al. (2007)	29	China	Zhejiang Province		Tiantong Natinal Forest Park	29.9	121.7	C	Subtropical everg broad-leaved forest	Cyclobalanopsis gracilis	Fagaceae	Tree (evergreen)	Picked from plants + litterfall traps	16.2	1375	200			1.36	1.07	0.07	0.04							94.3
280	Huang et al. (2007)	29	China	Zhejiang Province		Tiantong Natinal Forest Park	29.9	121.7	C	Subtropical everg broad-leaved forest	Cyclobalanopsis myrsinaefolia	Fagaceae	Tree (evergreen)	Picked from plants + litterfall traps	16.2	1375	200			1.86	1.29	0.09	0.06							75.8
281	Huang et al. (2007)	29	China	Zhejiang Province		Tiantong Natinal Forest Park	29.9	121.7	C	Subtropical everg broad-leaved forest	Lithocarpus glaber	Fagaceae	Tree (evergreen)	Picked from plants + litterfall traps	16.2	1375	200			1.71	1.3	0.07	0.05							86.2
282	Huang et al. (2007)	29	China	Zhejiang Province		Tiantong Natinal Forest Park	29.9	121.7	C	Subtropical everg broad-leaved forest	Cinnamomum camphora	Lauraceae	Tree (evergreen)	Picked from plants + litterfall traps	16.2	1375	200			1.56	1.1	0.09	0.09							80
283	Huang et al. (2007)	29	China	Zhejiang Province		Tiantong Natinal Forest Park	29.9	121.7	C	Subtropical everg broad-leaved forest	Machilus leptophylla	Lauraceae	Tree (evergreen)	Picked from plants + litterfall traps	16.2	1375	200			2.25	1.51	0.23	0.11							90.1
284	Huang et al. (2007)	29	China	Zhejiang Province		Tiantong Natinal Forest Park	29.9	121.7	C	Subtropical everg broad-leaved forest	Phoebe sheareri	Lauraceae	Tree (evergreen)	Picked from plants + litterfall traps	16.2	1375	200			2.13	1.6	0.15	0.11							117.6
285	Huang et al. (2007)	29	China	Zhejiang Province		Tiantong Natinal Forest Park	29.9	121.7	C	Subtropical everg broad-leaved forest	Helicia cochinchinensis	Proteaceae	Tree (evergreen)	Picked from plants + litterfall traps	16.2	1375	200			1.6	1.02	0.06	0.05							76.3
286	Huang et al. (2007)	29	China	Zhejiang Province		Tiantong Natinal Forest Park	29.9	121.7	C	Subtropical everg broad-leaved forest	Randia cochinchinensis	Rubiaceae	Tree (evergreen)	Picked from plants + litterfall traps	16.2	1375	200			1.91	1.06	0.08	0.06							71.4
287	Huang et al. (2007)	29	China	Zhejiang Province		Tiantong Natinal Forest Park	29.9	121.7	C	Subtropical everg broad-leaved forest	Daphniphyllum oldhamii	Daphniphylaceae	Tree (evergreen)	Picked from plants + litterfall traps	16.2	1375	200			1.82	1.3	0.1	0.05							70.9
288	Huang et al. (2007)	29	China	Zhejiang Province		Tiantong Natinal Forest Park	29.9	121.7	C	Subtropical everg broad-leaved forest	Castanopsis fargesii	Fagaceae	Tree (evergreen)	Picked from plants + litterfall traps	16.2	1375	200			1.68	1.31	0.07	0.04							108.7
289	Huang et al. (2007)	29	China	Zhejiang Province		Tiantong Natinal Forest Park	29.9	121.7	C	Subtropical everg broad-leaved forest	Lithocarpus harlandii	Fagaceae	Tree (evergreen)	Picked from plants + litterfall traps	16.2	1375	200			1.61	1.18	0.09	0.05							84
290	Huang et al. (2007)	29	China	Zhejiang Province		Tiantong Natinal Forest Park	29.9	121.7	C	Subtropical everg broad-leaved forest	Neolitsea aurata	Lauraceae	Tree (evergreen)	Picked from plants + litterfall traps	16.2	1375	200			1.61	0.9	0.08	0.06							97.1
291	Huang et al. (2007)	29	China	Zhejiang Province		Tiantong Natinal Forest Park	29.9	121.7	C	Subtropical everg broad-leaved forest	Photinia glabra	Rosaceae	Tree (evergreen)	Picked from plants + litterfall traps	16.2	1375	200			1.02	0.78	0.08	0.05							75.2
292	Huang et al. (2007)	29	China	Zhejiang Province		Tiantong Natinal Forest Park	29.9	121.7	C	Subtropical everg broad-leaved forest	Styrax suberifolia	Styracaceae	Tree (evergreen)	Picked from plants + litterfall traps	16.2	1375	200			1.74	1.22	0.08	0.06							76.3
293	Huang et al. (2007)	29	China	Zhejiang Province		Tiantong Natinal Forest Park	29.9	121.7	C	Subtropical everg broad-leaved forest	Symplocos anomala	Symplocaceae	Tree (evergreen)	Picked from plants + litterfall traps	16.2	1375	200			1.1	0.75	0.05	0.03							73
294	Huang et al. (2007)	29	China	Zhejiang Province		Tiantong Natinal Forest Park	29.9	121.7	C	Subtropical everg broad-leaved forest	Symplocos laurina	Symplocaceae	Tree (evergreen)	Picked from plants + litterfall traps	16.2	1375	200			1.72	0.85	0.08	0.05							97.1
295	Huang et al. (2007)	29	China	Zhejiang Province		Tiantong Natinal Forest Park	29.9	121.7	C	Subtropical everg broad-leaved forest	Symplocos stellaris	Symplocaceae	Tree (evergreen)	Picked from plants + litterfall traps	16.2	1375	200			1.24	0.81	0.05	0.04							112.4
296	Huang et al. (2007)	29	China	Zhejiang Province		Tiantong Natinal Forest Park	29.9	121.7	C	Subtropical everg broad-leaved forest	Eurya rubiginosa	Theaceae	Tree (evergreen)	Picked from plants + litterfall traps	16.2	1375	200			1.25	0.81	0.05	0.03							86.2
297	Huang et al. (2007)	29	China	Zhejiang Province		Tiantong Natinal Forest Park	29.9	121.7	C	Subtropical everg broad-leaved forest	Schima superba	Theaceae	Tree (evergreen)	Picked from plants + litterfall traps	16.2	1375	200			1.25	0.69	0.06	0.03							105.3
127	Keenan et al. (1995)	30	Canada	Vancouver Island	Port MacNeill	Provincial Forest	50.7	-127.8	C		Thuja plicata	Cupressaceae	Conifers	Litterfall traps cleared monthly	7.9	1700	300			0.93	0.43	0.1	0.04							0.5
128	Keenan et al. (1995)	30	Canada	Vancouver Island	Port MacNeill	Provincial Forest	50.7	-127.8	C		Tsuga heterophylla	Pinaceae	Conifers	Litterfall traps cleared monthly	7.9	1700	300			1.26	0.64	0.09	0.04							0.7
129	Keenan et al. (1995)	30	Canada	Vancouver Island	Port MacNeill	Provincial Forest	50.7	-127.8	C		Tsuga heterophylla	Pinaceae	Conifers	Litterfall traps cleared monthly	7.9	1700	300			1.4	0.83	0.12	0.05							0.8
130	Keenan et al. (1995)	30	Canada	Vancouver Island	Port MacNeill	Provincial Forest	50.7	-127.8	C		Abies amabilis	Pinaceae	Conifers	Litterfall traps cleared monthly	7.9	1700	300			1.29	1.11	0.12	0.06							1
640	Kilic et al. (2010)	31	Turkey	Amasya		Yassical Mountain	40.7	35.8	C		Arbutus andrachne	Ericaceae	Tree (evergreen)	Picked from the plant	13.7	500	450			2.39	1.77	0.26	0.18
641	Kilic et al. (2010)	31	Turkey	Amasya		Yassical Mountain	40.7	35.8	C		Arbutus andrachne	Ericaceae	Tree (evergreen)	Picked from the plant	13.7	500	600			2.69	2.02	0.27	0.15
642	Kilic et al. (2010)	31	Turkey	Amasya		Yassical Mountain	40.7	35.8	C		Arbutus andrachne	Ericaceae	Tree (evergreen)	Picked from the plant	13.7	500	800			2.61	2.07	0.25	0.19
643	Kilic et al. (2010)	31	Turkey	Amasya		Yassical Mountain	40.7	35.8	C		Quercus petrae	Fagaceae	Tree (deciduous)	Picked from the plant	13.7	500	450			2.26	1.62	0.25	0.11
644	Kilic et al. (2010)	31	Turkey	Amasya		Yassical Mountain	40.7	35.8	C		Quercus petrae	Fagaceae	Tree (deciduous)	Picked from the plant	13.7	500	600			2.47	1.97	0.22	0.14
645	Kilic et al. (2010)	31	Turkey	Amasya		Yassical Mountain	40.7	35.8	C		Quercus petrae	Fagaceae	Tree (deciduous)	Picked from the plant	13.7	500	800			2.44	1.8	0.21	0.13
654	Killingbeck & Costigan (1988)	32	USA	RI			41.6	-71.5	C	Deciduous forest	Gaylussacia baccata	Ericaceae	Tree (deciduous)		10	1120	100			0.99	0.68	0.08	0.06							66	63
655	Killingbeck & Costigan (1988)	32	USA	RI			41.6	-71.5	C	Deciduous forest	Quercus ilicifolia	Fagaceae	Tree (deciduous)		10	1120	100			1.78	0.62	0.14	0.07							89	76
656	Killingbeck & Costigan (1988)	32	USA	RI			41.6	-71.5	C	Deciduous forest	Vaccinium pallidum	Ericaceae	Tree (deciduous)		10	1120	100			0.79	0.59	0.08	0.05							73	72
830	Killingbeck et al. (2002)	33									Dennstaedtia punctilobula	Dennstaedtiaceae	Ferns							1.46	0.7	0.14	0.07
831	Killingbeck et al. (2002)	33									Pteridium aquilinum	Dennstaedtiaceae	Ferns							1.92	1	0.15	0.1
832	Killingbeck et al. (2002)	33									Andropogon gerardii	Poaceae	Graminoid							0.48	0.2
833	Killingbeck et al. (2002)	33									Carex aquatilis	Cyperaceae	Graminoid							3.19	1.5	0.22	0.1
834	Killingbeck et al. (2002)	33									Dupontia fischeri	Poaceae	Graminoid							1.52	1.2	0.2	0.11
835	Killingbeck et al. (2002)	33									Eriophorum angustifolium	Cyperaceae	Graminoid							3.16	1.8	0.31	0.12
836	Killingbeck et al. (2002)	33									Eriophorum vaginatum	Cyperaceae	Graminoid							2.33	1	0.31	0.12
837	Killingbeck et al. (2002)	33									Kobresia myosuroides	Cyperaceae	Graminoid							2.5	1.1
838	Killingbeck et al. (2002)	33									Molinia caerulea	Poaceae	Graminoid							1.71	0.7	0.53	0.1
839	Killingbeck et al. (2002)	33									Molinia caerulea	Poaceae	Graminoid							1.92	0.5	0.63	0.1
840	Killingbeck et al. (2002)	33									Molinia caerulea	Poaceae	Graminoid							2	0.5	0.12	0.02
841	Killingbeck et al. (2002)	33									Molinia caerulea	Poaceae	Graminoid							2.22	0.6	0.83	0.1
842	Killingbeck et al. (2002)	33									Cardamine concatenata	Brassicaceae	Forb							5	2.1	0.29	0.12
843	Killingbeck et al. (2002)	33									Geranium maculatum	Geraniaceae	Forb							2.09	1.4	0.21	0.16
844	Killingbeck et al. (2002)	33									Polygonatum pubescens	Liliaceae	Forb							2	1.6
845	Killingbeck et al. (2002)	33									Smilacina racemosa	Liliaceae	Forb							4.93	3.5	0.18	0.15
846	Killingbeck et al. (2002)	33									Trillium flexipes	Melanthiaceae	Forb							5.77	4.1	0.28	0.21
657	Kost & Boerner (1985)	34	USA	OH		Mixed oak	39.6	-82.6	C		Cornus florida	Cornaceae	Tree (deciduous)		11	1000	200			2.45	0.76	0.2	0.08
658	Kost & Boerner (1985)	34	USA	OH		Mixed mesophytic	39.6	-82.6	C		Cornus florida	Cornaceae	Tree (deciduous)		11	1000	200			2.18	0.74	0.25	0.23
659	Kost & Boerner (1985)	34	USA	OH		Transitional	39.6	-82.6	C		Cornus florida	Cornaceae	Tree (deciduous)		11	1000	200			2.39	0.84	0.32	0.23
370	Kumar et al. (2010)	35	India	Rajasthan	Aravally Mountain		23.1	69.5	A		Acacia nilotica	N-fixer Fabaceae	Tree (deciduous)	Picked from the plant	26	493	580			1.92	1.78	0.1	0.09	0.75	0.78	1.84	1.85	1.32	1.4
371	Kumar et al. (2010)	35	India	Rajasthan	Aravally Mountain		23.1	69.5	A		Acacia leucophloea	N-fixer Fabaceae	Tree (evergreen)	Picked from the plant	26	493	580			1.84	1.69	0.09	0.08	0.67	0.67	1.74	1.79	1.21	1.38
372	Kumar et al. (2010)	35	India	Rajasthan	Aravally Mountain		23.1	69.5	A		Tectona grandis	Verbenaceae	Tree (deciduous)	Picked from the plant	26	493	580			1.74	1.63	0.08	0.07	0.58	0.58	1.7	1.84	1.02	1.16
373	Kumar et al. (2010)	35	India	Rajasthan	Aravally Mountain		23.1	69.5	A		Miliusa tomentosa	Annonaceae	Tree (deciduous)	Picked from the plant	26	493	580			1.61	1.38	0.07	0.06	0.49	0.51	1.57	1.78	1	1.11
374	Kumar et al. (2010)	35	India	Rajasthan	Aravally Mountain		23.1	69.5	A		Butea monosperma	N-fixer Fabaceae	Tree (deciduous)	Picked from the plant	26	493	580			1.83	1.55	0.08	0.07	0.65	0.66	1.42	1.67	1.17	1.21
636	Kutbay & Ok (2003)	36	Turkey	Tavsanburnu			37	28	C		Juniperus oxycedrus	Cupressaceae	Conifers	Picked from the plant or recently fallen	17.6	1002	10			1.08	0.74	0.02	0	0.04	0
637	Kutbay & Ok (2003)	36	Turkey	Tavsanburnu			37	28	C		Juniperus oxycedrus	Cupressaceae	Conifers	Picked from the plant or recently fallen	17.6	1002	50			0.98	0.7	0.02	0	0.03	0.05
638	Kutbay & Ok (2003)	36	Turkey	Tavsanburnu			37	28	C		Juniperus oxycedrus	Cupressaceae	Conifers	Picked from the plant or recently fallen	17.6	1002	150			0.64	0.3	0.01	0	0.02	0.05
639	Kutbay & Ok (2003)	36	Turkey	Tavsanburnu			37	28	C		Juniperus oxycedrus	Cupressaceae	Conifers	Picked from the plant or recently fallen	17.6	1002	200			0.82	0.5	0.03	0	0.03	0.03
375	Lal et al (2001b)	37	India			Inceptisol - fertile	25.3	83	C		Amoora rohituka	Meliaceae	Tree (evergreen)	Picked from the plant	26	1100	76	41.01	40.5	1.81	0.9	0.26	0.22							40.6	30.3
376	Lal et al (2001b)	37	India			Inceptisol - fertile	25.3	83	C		Annona squamosa	Annonaceae	Tree (evergreen)	Picked from the plant	26	1100	76	42.68	41.5	3.17	1.65	0.17	0.09							54.9	49.4
377	Lal et al (2001b)	37	India			Inceptisol - fertile	25.3	83	C		Anthocephalus cadamba	Rubiaceae	Tree (evergreen)	Picked from the plant	26	1100	76	49.86	49.65	1.75	0.87	0.19	0.11							113.8	93.2
378	Lal et al (2001b)	37	India			Inceptisol - fertile	25.3	83	C		Artocarpus heterophyllus	Moraceae	Tree (evergreen)	Picked from the plant	26	1100	76	38.69	37.56	2.62	1.08	0.19	0.08							105.7	100.2
379	Lal et al (2001b)	37	India			Inceptisol - fertile	25.3	83	C		Bougainvillea spectabilis	Nyctaginaceae	Tree (evergreen)	Picked from the plant	26	1100	76	40.8	36.61	2.73	1.81	0.11	0.08							67.1	52
380	Lal et al (2001b)	37	India			Inceptisol - fertile	25.3	83	C		Carissa carundu	Apocynaceae	Tree (evergreen)	Picked from the plant	26	1100	76	46.98	46.62	1.17	0.73	0.15	0.12							88.4	84.1
381	Lal et al (2001b)	37	India			Inceptisol - fertile	25.3	83	C		Crescentia cujete	Bignoniaceae	Tree (evergreen)	Picked from the plant	26	1100	76	40.11	40	2	1.05	0.16	0.1							68	57.7
382	Lal et al (2001b)	37	India			Inceptisol - fertile	25.3	83	C		Dillenia indica	Dilleniaceae	Tree (evergreen)	Picked from the plant	26	1100	76	38.97	37.72	1.36	0.93	0.14	0.11							91.9	63.4
383	Lal et al (2001b)	37	India			Inceptisol - fertile	25.3	83	C		Diospyros embryopteris	Ebenaceae	Tree (evergreen)	Picked from the plant	26	1100	76	49.9	48.29	1.63	0.88	0.27	0.12							101.9	97.8
384	Lal et al (2001b)	37	India			Inceptisol - fertile	25.3	83	C		Eucalyptus globulus	Myrtaceae	Tree (evergreen)	Picked from the plant	26	1100	76	50.03	48.96	1.27	0.65	0.15	0.11							145	132
385	Lal et al (2001b)	37	India			Inceptisol - fertile	25.3	83	C		Ficus benghalensis	Moraceae	Tree (evergreen)	Picked from the plant	26	1100	76	38.54	38.52	1.29	0.66	0.11	0.05							126.4	114.6
386	Lal et al (2001b)	37	India			Inceptisol - fertile	25.3	83	C		Gardenia jasminoides	Rubiaceae	Tree (evergreen)	Picked from the plant	26	1100	76	41.55	40.73	1.52	0.87	0.17	0.15							82.1	70.4
387	Lal et al (2001b)	37	India			Inceptisol - fertile	25.3	83	C		Hamelia patens	Rubiaceae	Tree (evergreen)	Picked from the plant	26	1100	76	44.22	42.22	3.34	1.66	0.21	0.13							66.3	51.5
388	Lal et al (2001b)	37	India			Inceptisol - fertile	25.3	83	C		Hibiscus rosa-sinensis	Malvaceae	Tree (evergreen)	Picked from the plant	26	1100	76	38.62	37.41	2.24	0.88	0.6	0.46							46.6	38.2
389	Lal et al (2001b)	37	India			Inceptisol - fertile	25.3	83	C		Ixora alba	Rubiaceae	Tree (evergreen)	Picked from the plant	26	1100	76	46.03	43.27	2.2	1.5	0.27	0.19							83.7	77.2
390	Lal et al (2001b)	37	India			Inceptisol - fertile	25.3	83	C		Ixora coccinea	Rubiaceae	Tree (evergreen)	Picked from the plant	26	1100	76	46.94	46.6	1.39	0.94	0.15	0.12							101.5	84.5
391	Lal et al (2001b)	37	India			Inceptisol - fertile	25.3	83	C		Litchi chinensis	Sapindaceae	Tree (evergreen)	Picked from the plant	26	1100	76	46.3	45.88	1.42	0.86	0.27	0.24							128.9	100
392	Lal et al (2001b)	37	India			Inceptisol - fertile	25.3	83	C		Magnolia grandiflora	Magnoliaceae	Tree (evergreen)	Picked from the plant	26	1100	76	42.43	40.43	1.34	0.49	0.12	0.05							156.4	151.2
393	Lal et al (2001b)	37	India			Inceptisol - fertile	25.3	83	C		Mallotus philippensis	Euphorbiaceae	Tree (evergreen)	Picked from the plant	26	1100	76	40.03	34.37	2.49	0.87	0.4	0.37							57.2	51.5
394	Lal et al (2001b)	37	India			Inceptisol - fertile	25.3	83	C		Mangifera indica	Anacardiaceae	Tree (evergreen)	Picked from the plant	26	1100	76	41.21	40.09	1.68	0.78	0.15	0.07							135.4	116.5
395	Lal et al (2001b)	37	India			Inceptisol - fertile	25.3	83	C		Mimusops elengi	Sapotaceae	Tree (evergreen)	Picked from the plant	26	1100	76	46.6	45.89	1.67	0.74	0.45	0.4							125.5	117.3
396	Lal et al (2001b)	37	India			Inceptisol - fertile	25.3	83	C		Mimusops hexendra	Sapotaceae	Tree (evergreen)	Picked from the plant	26	1100	76	46.73	44.9	1.62	0.84	0.25	0.18							122.9	112.1
397	Lal et al (2001b)	37	India			Inceptisol - fertile	25.3	83	C		Polyalthia longifolia	Annonaceae	Tree (evergreen)	Picked from the plant	26	1100	76	48.45	47.47	2.12	1.08	0.21	0.15							64.1	61.4
398	Lal et al (2001b)	37	India			Inceptisol - fertile	25.3	83	C		Polyalthia pendulosa	Annonaceae	Tree (evergreen)	Picked from the plant	26	1100	76	49.03	48.57	2.53	1.43	0.24	0.18							71.8	64.7
399	Lal et al (2001b)	37	India			Inceptisol - fertile	25.3	83	C		Psidium guajava	Myrtaceae	Tree (evergreen)	Picked from the plant	26	1100	76	46.32	45.87	1.73	0.76	0.21	0.15							91.1	83.7
400	Lal et al (2001b)	37	India			Inceptisol - fertile	25.3	83	C		Pterospermum acerifolia	Malvaceae	Tree (evergreen)	Picked from the plant	26	1100	76	47.71	46.22	1.43	0.64	0.26	0.13							95.7	87.5
401	Lal et al (2001b)	37	India			Inceptisol - fertile	25.3	83	C		Quisqualis indica	Combretaceae	Tree (evergreen)	Picked from the plant	26	1100	76	39.91	38.61	2.91	1.68	0.43	0.4							40.6	26
402	Lal et al (2001b)	37	India			Inceptisol - fertile	25.3	83	C		Saraca indica	N-fixer Caesalpiniaceae	Tree (evergreen)	Picked from the plant	26	1100	76	45.3	42.98	2.04	1.3	0.21	0.13							88.4	84.1
403	Lal et al (2001b)	37	India			Inceptisol - fertile	25.3	83	C		Spathodea companulata	Bignoniaceae	Tree (evergreen)	Picked from the plant	26	1100	76	41.35	40.21	1.93	1.08	0.17	0.09							103.7	75.2
404	Lal et al (2001b)	37	India			Inceptisol - fertile	25.3	83	C		Syzygium jambos	Myrtaceae	Tree (evergreen)	Picked from the plant	26	1100	76	47.82	46.86	1.35	1.05	0.09	0.05							115.4	109.2
405	Lal et al (2001b)	37	India			Inceptisol - fertile	25.3	83	C		Tabernaemontana coronaria	Apocynaceae	Tree (evergreen)	Picked from the plant	26	1100	76	43.72	41.78	4.11	1.8	0.54	0.45							55.3	41.1
406	Lal et al (2001b)	37	India			Inceptisol - fertile	25.3	83	C		Thevetia paruviana	Apocynaceae	Tree (evergreen)	Picked from the plant	26	1100	76	40.63	38.62	1.92	0.96	0.13	0.07							72.7	64.7
407	Lal et al (2001b)	37	India			Inceptisol - fertile	25.3	83	C		Woodfordia fruticosa	Rubiaceae	Tree (evergreen)	Picked from the plant	26	1100	76	40.81	40.14	1.33	0.72	0.13	0.08							110.9	64.4
408	Lal et al (2001b)	37	India			Inceptisol - fertile	25.3	83	C		Aegle marmelos	Rutaceae	Tree (deciduous)	Picked from the plant	26	1100	76	37.64	35.34	1.93	0.77	0.52	0.31							114.6	86.4
409	Lal et al (2001b)	37	India			Inceptisol - fertile	25.3	83	C		Artocarpus lakoocha	Moraceae	Tree (deciduous)	Picked from the plant	26	1100	76	37.5	36.4	1.99	1.22	0.17	0.11							91.9	81.6
410	Lal et al (2001b)	37	India			Inceptisol - fertile	25.3	83	C		Azadirachta indica	Meliaceae	Tree (deciduous)	Picked from the plant	26	1100	76	44.05	43.4	3.05	1.32	0.19	0.09							79	48.3
411	Lal et al (2001b)	37	India			Inceptisol - fertile	25.3	83	C		Bambusa bambos	Poaceae	Tree (deciduous)	Picked from the plant	26	1100	76	32.07	31.46	2.3	0.74	0.14	0.05							62.2	50.4
412	Lal et al (2001b)	37	India			Inceptisol - fertile	25.3	83	C		Bombax ceiba	Malvaceae	Tree (deciduous)	Picked from the plant	26	1100	76	45.43	44.18	1.6	1	0.19	0.11							115.4	91.3
413	Lal et al (2001b)	37	India			Inceptisol - fertile	25.3	83	C		Bauhinia variegata	N-fixer Fabaceae	Tree (deciduous)	Picked from the plant	26	1100	76	44.06	41.68	3.01	1.03	0.46	0.39							76.2	59.9
414	Lal et al (2001b)	37	India			Inceptisol - fertile	25.3	83	C		Cassia fistula	N-fixer Fabaceae	Tree (deciduous)	Picked from the plant	26	1100	76	47.64	47.2	2.2	0.79	0.17	0.09							65.4	61.5
415	Lal et al (2001b)	37	India			Inceptisol - fertile	25.3	83	C		Cordia dichotoma	Boraginaceae	Tree (deciduous)	Picked from the plant	26	1100	76	39.06	37.81	2.12	0.65	0.17	0.06							115	65.3
416	Lal et al (2001b)	37	India			Inceptisol - fertile	25.3	83	C		Dalbergia sissoo	N-fixer Fabaceae	Tree (deciduous)	Picked from the plant	26	1100	76	40.5	39.9	2.09	1.33	0.18	0.07							120.9	85.4
417	Lal et al (2001b)	37	India			Inceptisol - fertile	25.3	83	C		Ficus carica	Moraceae	Tree (deciduous)	Picked from the plant	26	1100	76	37.78	34.07	3.16	1.78	0.21	0.15							85.8	48.5
418	Lal et al (2001b)	37	India			Inceptisol - fertile	25.3	83	C		Ficus religiosa	Moraceae	Tree (deciduous)	Picked from the plant	26	1100	76	34.74	32.17	1.48	0.86	0.12	0.07							108.9	80.3
419	Lal et al (2001b)	37	India			Inceptisol - fertile	25.3	83	C		Ficus rumphii	Moraceae	Tree (deciduous)	Picked from the plant	26	1100	76	38.4	37.05	1.55	0.97	0.13	0.1							79.1	59.3
420	Lal et al (2001b)	37	India			Inceptisol - fertile	25.3	83	C		Grewia asiatica	Malvaceae	Tree (deciduous)	Picked from the plant	26	1100	76	44.43	42.87	1.73	0.68	0.28	0.19							101.2	82.9
421	Lal et al (2001b)	37	India			Inceptisol - fertile	25.3	83	C		Holoptelea integrifolia	Ulmaceae	Tree (deciduous)	Picked from the plant	26	1100	76	38.77	35.69	2.75	1.9	0.16	0.13							62.6	43.1
422	Lal et al (2001b)	37	India			Inceptisol - fertile	25.3	83	C		Kigelia pinnata	Bignoniaceae	Tree (deciduous)	Picked from the plant	26	1100	76	32.15	31.98	1.69	0.79	0.18	0.11							109.2	79.7
423	Lal et al (2001b)	37	India			Inceptisol - fertile	25.3	83	C		Lagerstroemia speciosa	Lythraceae	Tree (deciduous)	Picked from the plant	26	1100	76	42.56	42.2	2.03	1.14	0.21	0.13							87.4	51.6
424	Lal et al (2001b)	37	India			Inceptisol - fertile	25.3	83	C		Madhuca indica	Sapotaceae	Tree (deciduous)	Picked from the plant	26	1100	76	47.9	44.87	1.77	0.62	0.12	0.08							112.3	92.9
425	Lal et al (2001b)	37	India			Inceptisol - fertile	25.3	83	C		Mitragyna parviflora	Rubiaceae	Tree (deciduous)	Picked from the plant	26	1100	76	44.67	44.39	1.96	1.24	0.13	0.09							91	48
426	Lal et al (2001b)	37	India			Inceptisol - fertile	25.3	83	C		Morus alba	Moraceae	Tree (deciduous)	Picked from the plant	26	1100	76	34.18	33.78	2.03	1.17	0.17	0.15							67.3	43.8
427	Lal et al (2001b)	37	India			Inceptisol - fertile	25.3	83	C		Nyctanthes arbor-tristis	Oleaceae	Tree (deciduous)	Picked from the plant	26	1100	76	32.95	32.71	1.7	0.79	0.29	0.2							98.1	61.8
428	Lal et al (2001b)	37	India			Inceptisol - fertile	25.3	83	C		Pongamia pinnata	N-fixer Fabaceae	Tree (deciduous)	Picked from the plant	26	1100	76	43.99	43.08	2.79	1.64	0.15	0.05							60.4	43.1
429	Lal et al (2001b)	37	India			Inceptisol - fertile	25.3	83	C		Populus deltoides	Salicaceae	Tree (deciduous)	Picked from the plant	26	1100	76	40.66	39.11	2.41	0.91	0.18	0.05							102.7	78.8
430	Lal et al (2001b)	37	India			Inceptisol - fertile	25.3	83	C		Sapindus mykorossi	Sapindaceae	Tree (deciduous)	Picked from the plant	26	1100	76	43.83	40.07	3.01	1.15	0.37	0.29							52.4	39.8
431	Lal et al (2001b)	37	India			Inceptisol - fertile	25.3	83	C		Schleichera oleosa	Sapindaceae	Tree (deciduous)	Picked from the plant	26	1100	76	39.92	39	1.79	0.73	0.52	0.31							81.3	63.1
432	Lal et al (2001b)	37	India			Inceptisol - fertile	25.3	83	C		Semecarpus anacardium	Anacardiaceae	Tree (deciduous)	Picked from the plant	26	1100	76	39.85	38.48	1.83	0.57	0.29	0.16							67.2	45.8
433	Lal et al (2001b)	37	India			Inceptisol - fertile	25.3	83	C		Spondias mangifera	Anacardiaceae	Tree (deciduous)	Picked from the plant	26	1100	76	37.29	33.85	1.76	0.71	0.15	0.1							77.2	42.3
434	Lal et al (2001b)	37	India			Inceptisol - fertile	25.3	83	C		Sterculia alata	Sterculiaceae	Tree (deciduous)	Picked from the plant	26	1100	76	40.17	40.06	2.28	1.07	0.2	0.08							87.5	47.8
435	Lal et al (2001b)	37	India			Inceptisol - fertile	25.3	83	C		Sterculia colorata	Sterculiaceae	Tree (deciduous)	Picked from the plant	26	1100	76	38.23	37.31	1.65	0.66	0.18	0.11							88.9	59.3
436	Lal et al (2001b)	37	India			Inceptisol - fertile	25.3	83	C		Strychnos nuxvomica	Loganiaceae	Tree (deciduous)	Picked from the plant	26	1100	76	47.66	45.57	2.62	1.38	0.11	0.09							80.2	57.6
437	Lal et al (2001b)	37	India			Inceptisol - fertile	25.3	83	C		Swietinia mahogany	Meliaceae	Tree (deciduous)	Picked from the plant	26	1100	76	46.78	45.65	1.52	0.62	0.09	0.05							84.8	71.2
438	Lal et al (2001b)	37	India			Inceptisol - fertile	25.3	83	C		Tectona grandis	Lamiaceae	Tree (deciduous)	Picked from the plant	26	1100	76	41.18	39.84	1.5	1.06	0.17	0.12							135.2	90.2
439	Lal et al (2001b)	37	India			Inceptisol - fertile	25.3	83	C		Terminalia arjuna	Combretaceae	Tree (deciduous)	Picked from the plant	26	1100	76	39.82	39.5	1.46	0.73	0.19	0.15							131.2	88.7
440	Lal et al (2001b)	37	India			Inceptisol - fertile	25.3	83	C		Terminalia bellirica	Combretaceae	Tree (deciduous)	Picked from the plant	26	1100	76	36.97	35.08	0.86	0.5	0.32	0.27							157.4	105.1
441	Lal et al (2001b)	37	India			Inceptisol - fertile	25.3	83	C		Terminalia chebula	Combretaceae	Tree (deciduous)	Picked from the plant	26	1100	76	42.72	42.37	1.94	1.14	0.27	0.14							74.5	53.2
442	Lal et al (2001b)	37	India			Inceptisol - fertile	25.3	83	C		Zizyphus jujuba	Rhamnaceae	Tree (deciduous)	Picked from the plant	26	1100	76	43.47	41.8	1.76	0.82	0.19	0.15							132.1	80.2
443	Lal et al (2001b)	37	India			Ultisol - infertile	27.3	83.6	C	Dry deciduous forest	Anogeissus latifolia	Combretaceae	Tree (deciduous)	Picked from the plant	25	1055	355	44.5	43.71	1.44	1.06	0.09	0.07							145.4	126.7
444	Lal et al (2001b)	37	India			Ultisol - infertile	27.3	83.6	C	Dry deciduous forest	Bauhinia racemosa	N-fixer Fabaceae	Tree (deciduous)	Picked from the plant	25	1055	355	43.43	42.72	2.47	1.34	0.18	0.1							82.2	51.2
445	Lal et al (2001b)	37	India			Ultisol - infertile	27.3	83.6	C	Dry deciduous forest	Boswellia serrata	Burseraceae	Tree (deciduous)	Picked from the plant	25	1055	355	44.62	42.74	1.32	0.81	0.5	0.47							125.6	106.1
446	Lal et al (2001b)	37	India			Ultisol - infertile	27.3	83.6	C	Dry deciduous forest	Bridelia retusa	Euphorbiaceae	Tree (deciduous)	Picked from the plant	25	1055	355	46.97	45.19	1.95	1.39	0.15	0.09							86.3	61.8
447	Lal et al (2001b)	37	India			Ultisol - infertile	27.3	83.6	C	Dry deciduous forest	Gardenia latifolia	Rubiaceae	Tree (deciduous)	Picked from the plant	25	1055	355	45.51	44.08	1.7	1	0.12	0.09							87.8	56.4
448	Lal et al (2001b)	37	India			Ultisol - infertile	27.3	83.6	C	Dry deciduous forest	Hardwickia binata	N-fixer Fabaceae	Tree (deciduous)	Picked from the plant	25	1055	355	46.21	44.63	2.02	0.68	0.12	0.04							119.2	88.1
449	Lal et al (2001b)	37	India			Ultisol - infertile	27.3	83.6	C	Dry deciduous forest	Lagerstroemia parviflora	Lythraceae	Tree (deciduous)	Picked from the plant	25	1055	355	47.57	44.16	1.35	0.82	0.09	0.08							127.4	90.6
450	Lal et al (2001b)	37	India			Ultisol - infertile	27.3	83.6	C	Dry deciduous forest	Lannea coromandelica	Anacardiaceae	Tree (deciduous)	Picked from the plant	25	1055	355	44.76	44.03	1.62	1.22	0.47	0.41							80.7	48.2
451	Lal et al (2001b)	37	India			Ultisol - infertile	27.3	83.6	C	Dry deciduous forest	Miliusa tomentosa	Annonaceae	Tree (deciduous)	Picked from the plant	25	1055	355	46.64	42.09	2.27	1.72	0.16	0.12							85.8	76.7
452	Lal et al (2001b)	37	India			Ultisol - infertile	27.3	83.6	C	Dry deciduous forest	Pterocarpus marsupium	N-fixer Fabaceae	Tree (deciduous)	Picked from the plant	25	1055	355	44.48	40.42	2.48	1.54	0.1	0.08							115.5	81.4
453	Lal et al (2001b)	37	India			Ultisol - infertile	27.3	83.6	C	Dry deciduous forest	Soymida febrifuga	Meliaceae	Tree (deciduous)	Picked from the plant	25	1055	355	45.89	45.76	1.41	0.79	0.08	0.05							134.1	117.7
454	Lal et al (2001b)	37	India			Ultisol - infertile	27.3	83.6	C	Dry deciduous forest	Wrightia tomentosa	Apocynaceae	Tree (deciduous)	Picked from the plant	25	1055	355	46.16	44.62	2.31	1.69	0.13	0.08							66.7	42
455	Lal et al (2001b)	37	India			Ultisol - infertile	27.3	83.6	C	Dry deciduous forest	Xeromphis uliginosa	Rubiaceae	Tree (deciduous)	Picked from the plant	25	1055	355	43.39	43.36	1.56	1.32	0.11	0.08							84.1	67.3
456	Lal et al (2001b)	37	India			Ultisol - infertile	27.3	83.6	C	Dry deciduous forest	Zizyphus glaberrima	Rhamnaceae	Tree (deciduous)	Picked from the plant	25	1055	355	47.3	46.32	2.19	1.4	0.13	0.08							99.5	73.8
457	Lal et al. (2001a)	38	India	Sonebhadra	Uttar Pradesh	Renukoot Forest	27.3	83.1	C	Dry deciduous forest	Ficus racemosa	Moraceae	Tree (evergreen)	Picked from the plant	26.5	1035	355	37.48	33.7	2.1	0.89	0.19	0.09	2	1.45	2.29	2.75			92.1	74
458	Lal et al. (2001a)	38	India	Sonebhadra	Uttar Pradesh	Renukoot Forest	27.3	83.1	C	Dry deciduous forest	Syzygium cumini	Myrtaceae	Tree (evergreen)	Picked from the plant	26.5	1035	355	46.42	44.47	2.06	1	0.11	0.04	1.24	0.89	1.45	1.85			136.4	106.9
459	Lal et al. (2001a)	38	India	Sonebhadra	Uttar Pradesh	Renukoot Forest	27.3	83.1	C	Dry deciduous forest	Shorea robusta	Dipterocarpaceae	Tree (evergreen)	Picked from the plant	26.5	1035	355	46.12	45.32	1.97	1.02	0.11	0.07	0.88	0.69	1.11	1.2			97.4	88.3
460	Lal et al. (2001a)	38	India	Sonebhadra	Uttar Pradesh	Renukoot Forest	27.3	83.1	C	Dry deciduous forest	Adina cordifolia	Rubiaceae	Tree (deciduous)	Picked from the plant	26.5	1035	355	47.18	46.43	2.1	1.36	0.15	0.11	1.06	0.52	1.09	1.34			122.3	95.3
461	Lal et al. (2001a)	38	India	Sonebhadra	Uttar Pradesh	Renukoot Forest	27.3	83.1	C	Dry deciduous forest	Buchanania lanzan	Anacardiaceae	Tree (deciduous)	Picked from the plant	26.5	1035	355	45.45	40.6	1.99	1.44	0.13	0.07	1.12	0.74	1.73	2.02			115.7	97.6
462	Lal et al. (2001a)	38	India	Sonebhadra	Uttar Pradesh	Renukoot Forest	27.3	83.1	C	Dry deciduous forest	Butea monosperma	N-fixer Fabaceae	Tree (deciduous)	Picked from the plant	26.5	1035	355	43.5	41.4	2.54	1.61	0.13	0.08	0.85	0.45	1.86	2.06			140	106.7
463	Lal et al. (2001a)	38	India	Sonebhadra	Uttar Pradesh	Renukoot Forest	27.3	83.1	C	Dry deciduous forest	Diospyros melanoxylon	Ebenaceae	Tree (deciduous)	Picked from the plant	26.5	1035	355	47.89	46.03	1.47	1.13	0.11	0.09	1.21	0.76	1	1.21			119.7	90.5
464	Lal et al. (2001a)	38	India	Sonebhadra	Uttar Pradesh	Renukoot Forest	27.3	83.1	C	Dry deciduous forest	Terminalia alata	Combretaceae	Tree (deciduous)	Picked from the plant	26.5	1035	355	41.72	40.83	1.47	1.1	0.13	0.09	0.85	0.59	2.38	2.48			106.9	78.4
711	Lin & Sternberg (2007)	39	USA	FL		Matheson Hammock Park	25.8	-80.3	A	Mangrove	Rhizophora mangle	Rhizophoraceae	Tree (evergreen)	Picked from the plant	21	1500	0			1.11	0.66	0.02	0.01
712	Lin & Sternberg (2007)	39	USA	FL		Matheson Hammock Park	25.8	-80.3	A	Mangrove	Rhizophora mangle	Rhizophoraceae	Tree (evergreen)	Picked from the plant	21	1500	0			1.48	0.8	0.03	0.02
713	Lin & Sternberg (2007)	39	USA	FL		Everglades National Park	25.7	-80.8	A	Mangrove	Rhizophora mangle	Rhizophoraceae	Tree (evergreen)	Picked from the plant	21	1500	0			1.36	0.77	0.03	0.01
851	Lin & Wang (2001)	40	China	Fujian Province	Fugong Town	Jiulongjiang Estuary	24.6	117.9	C		Kandelia candel	Rhizophoraceae	Tree (evergreen)		21.1	1475	0													193.5	180.1	18.3	16.7	354	296	16.4	9.1
852	Lin & Wang (2001)	40	China	Fujian Province	Fugong Town	Jiulongjiang Estuary	24.6	117.9	C		Bruguiera gymnorrhiza	Rhizophoraceae	Tree (evergreen)		21.1	1475	0													193.1	195.5	38.4	36.8	741	720	2.8	4
853	Lin & Wang (2001)	40	China	Fujian Province	Fugong Town	Jiulongjiang Estuary	24.6	117.9	C		Rhizophora stylosa	Rhizophoraceae	Tree (evergreen)		21.1	1475	0													223.4	215.1	38.4	35.7	862	768	10.9	7
210	Lin et al (2010)	41	China	Guangxi	Yingluo Bay	Shankou Mangrove Nature Reserve	21.5	109.7	C		Rhizophora stylosa	Rhizophoraceae	Tree (evergreen)		23.4	1600	0			0.86	0.04	0.09	0.04
66	Lindsay & French (2005)	42	Australia	New South Wales coastline			-33	151	C		Chrysanthemoides monilifera	Asteraceae	Tree (evergreen)	Picked from the plant	17	1300	0	39.4	38.6	1.9	0.64	0.15	0.06
67	Lindsay & French (2005)	42	Australia	New South Wales coastline			-33	151	C		Leptospermum laevigatum	Myrtaceae	Tree (evergreen)	Picked from the plant	17	1300	0	51.5	52	1.4	0.56	0.21	0.13
68	Lindsay & French (2005)	42	Australia	New South Wales coastline			-33	151	C		Acacia longifolia	N-fixer Fabaceae	Tree (evergreen)	Picked from the plant	17	1300	0	49.8	47.5	2.6	1.34	0.18	0.03
69	Lindsay & French (2005)	42	Australia	New South Wales coastline			-33	151	C		Banksia integrifolia	Proteaceae	Tree (evergreen)	Picked from the plant	17	1300	0	50.2	49.5	1.2	0.6	0.09	0.02
854	Lu et al. (2010)	43	China	Inner Mongolia		IMGERS	43.5	116.7	B		Leymus chinensis	Poaceae	Graminoid		1.1	345	1250																	95.5	76.7	19.7
855	Lu et al. (2010)	43	China	Inner Mongolia		IMGERS	43.5	116.7	B		Stipa grandis	Poaceae	Graminoid		1.1	345	1250																	77	53.6	30.4
856	Lu et al. (2010)	43	China	Inner Mongolia		IMGERS	43.5	116.7	B		Agropyron cristatum	Poaceae	Graminoid		1.1	345	1250																	40	30.2	24.5
857	Lu et al. (2010)	43	China	Inner Mongolia		IMGERS	43.5	116.7	B		Achnatherum sibiricum	Poaceae	Graminoid		1.1	345	1250																	101	74.6	26.1
858	Lu et al. (2010)	43	China	Inner Mongolia		IMGERS	43.5	116.7	B		Allium tenuissimum	Liliaceae	Forb		1.1	345	1250																	38.6	18.5	52.1
166	Lusk & Contreras (1999)	44	Chile		Valdivia		-40.2	-73.4	C	Temperate rain forest	Embothrium coccineum	Proteaceae	Tree (evergreen)	Recently fallen leaves	11.5	4000	870			1.74	0.62									103.2	91.3
167	Lusk & Contreras (1999)	44	Chile		Valdivia		-40.2	-73.4	C	Temperate rain forest	Weinmannia trichosperma	Cunoniaceae	Tree (evergreen)	Recently fallen leaves	11.5	4000	870			0.9	0.37									149.2	141.9
168	Lusk & Contreras (1999)	44	Chile		Valdivia		-40.2	-73.4	C	Temperate rain forest	Nothofagus betuloides	Nothofagaceae	Tree (evergreen)	Recently fallen leaves	11.5	4000	870			1.19	0.34									167.6	160.6
169	Lusk & Contreras (1999)	44	Chile		Valdivia		-40.2	-73.4	C	Temperate rain forest	Ovidia pillo-pillo	Thymelaeaceae	Tree (evergreen)	Recently fallen leaves	11.5	4000	870			2.14	0.68									98.8	79.4
170	Lusk & Contreras (1999)	44	Chile		Valdivia		-40.2	-73.4	C	Temperate rain forest	Eucryphia cordifolia	Eucryphiaceae	Tree (evergreen)	Recently fallen leaves	11.5	4000	870			0.99	0.46									122.5	117.9
171	Lusk & Contreras (1999)	44	Chile		Valdivia		-40.2	-73.4	C	Temperate rain forest	Nothofagus nitida	Nothofagaceae	Tree (evergreen)	Recently fallen leaves	11.5	4000	870			1.16	0.35									150.7	142.7
172	Lusk & Contreras (1999)	44	Chile		Valdivia		-40.2	-73.4	C	Temperate rain forest	Drimys winteri	Winteraceae	Tree (evergreen)	Recently fallen leaves	11.5	4000	870			0.87	0.34									178	173.9
173	Lusk & Contreras (1999)	44	Chile		Valdivia		-40.2	-73.4	C	Temperate rain forest	Laurelia philippiana	Monimiaceae	Tree (evergreen)	Recently fallen leaves	11.5	4000	870			1.56	0.78									133.9	111.3
174	Lusk & Contreras (1999)	44	Chile		Valdivia		-40.2	-73.4	C	Temperate rain forest	Aextoxicon punctatum	Aextoxicaceae	Tree (evergreen)	Recently fallen leaves	11.5	4000	870			0.96	0.61									126.8	122.1
175	Lusk & Contreras (1999)	44	Chile		Valdivia		-40.2	-73.4	C	Temperate rain forest	Amomyrtus luna	Myrtaceae	Tree (evergreen)	Recently fallen leaves	11.5	4000	870			1.01	0.43									141	131.7
176	Lusk & Contreras (1999)	44	Chile		Valdivia		-40.2	-73.4	C	Temperate rain forest	Myrceugenia planipes	Myrtaceae	Tree (evergreen)	Recently fallen leaves	11.5	4000	870			1.14	0.64									110.5	100.5
662	Marchin et al (2010)	45	USA	NC	Wake County		35.7	-78.8	C		Acer floridanum	Sapindaceae	Tree (deciduous)	Picked from the plant or recently fallen	15.3	1100	120			1.42	0.65	0.17	0.16	0.63	0.17	1.35	1.58
663	Marchin et al (2010)	45	USA	NC	Wake County		35.7	-78.8	C		Carya alba	Jungladaceae	Tree (deciduous)	Picked from the plant or recently fallen	15.3	1100	120			1.44	0.87	0.1	0.1	0.73	0.29	1.68	1.87
664	Marchin et al (2010)	45	USA	NC	Wake County		35.7	-78.8	C		Carya glabra	Jungladaceae	Tree (deciduous)	Picked from the plant or recently fallen	15.3	1100	120			1.66	0.7	0.1	0.06	0.71	0.34	1.55	1.59
665	Marchin et al (2010)	45	USA	NC	Wake County		35.7	-78.8	C		Cornus florida	Cornaceae	Tree (deciduous)	Picked from the plant or recently fallen	15.3	1100	120			1.34	1.11	0.09	0.07	0.94	0.6	1.62	2.12
666	Marchin et al (2010)	45	USA	NC	Wake County		35.7	-78.8	C		Fagus grandifolia	Fagaceae	Tree (deciduous)	Picked from the plant or recently fallen	15.3	1100	120			1.61	1.23	0.08	0.06	0.94	0.21	0.67	0.68
667	Marchin et al (2010)	45	USA	NC	Wake County		35.7	-78.8	C		Fraxinus americana	Oleaceae	Tree (deciduous)	Picked from the plant or recently fallen	15.3	1100	120			1.87	1.02	0.17	0.18	1.04	0.55	1.37	1.81
668	Marchin et al (2010)	45	USA	NC	Wake County		35.7	-78.8	C		Oxydendrum arboreum	Ericaceae	Tree (deciduous)	Picked from the plant or recently fallen	15.3	1100	120			1.68	0.79	0.09	0.04	0.88	0.44	0.83	1.01
669	Marchin et al (2010)	45	USA	NC	Wake County		35.7	-78.8	C		Prunus serotina	Rosaceae	Tree (deciduous)	Picked from the plant or recently fallen	15.3	1100	120			1.79	1.08	0.18	0.13	0.9	0.58	1.48	1.49
670	Marchin et al (2010)	45	USA	NC	Wake County		35.7	-78.8	C		Quercus alba	Fagaceae	Tree (deciduous)	Picked from the plant or recently fallen	15.3	1100	120			1.92	1.23	0.11	0.14	0.6	0.47	1.1	0.96
671	Marchin et al (2010)	45	USA	NC	Wake County		35.7	-78.8	C		Quercus rubra	Fagaceae	Tree (deciduous)	Picked from the plant or recently fallen	15.3	1100	120			1.67	1.45	0.11	0.12	0.66	0.5	0.88	1.04
672	Marchin et al (2010)	45	USA	NC	Wake County		35.7	-78.8	C		Vaccinium fuscatum	Ericaceae	Tree (deciduous)	Picked from the plant or recently fallen	15.3	1100	120			1.18	0.83
673	Marchin et al (2010)	45	USA	NC	Wake County		35.7	-78.8	C		Viburnum acerifolium	Adoxaceae	Tree (deciduous)	Picked from the plant or recently fallen	15.3	1100	120			1.49	0.71	0.09	0.04	1.5	0.93	0.99	1.12
674	Marchin et al (2010)	45	USA	NC	Wake County		35.7	-78.8	C		Viburnum nudum	Adoxaceae	Tree (deciduous)	Picked from the plant or recently fallen	15.3	1100	120			1.26	1.08	0.12	0.1	1.58	0.97	1.49	1.61
675	Marchin et al (2010)	45	USA	NC	Wake County		35.7	-78.8	C		Viburnum rafinesquianum	Adoxaceae	Tree (deciduous)	Picked from the plant or recently fallen	15.3	1100	120			1.2	1.11	0.1	0.16	1.2	0.64	1.17	1.57
676	Marchin et al (2010)	45	USA	NC	Wake County		35.7	-78.8	C		Acer rubrum	Sapindaceae	Tree (deciduous)	Picked from the plant or recently fallen	15.3	1100	120			1.31	0.49	0.09	0.02	0.65	0.21	0.62	0.84
677	Marchin et al (2010)	45	USA	NC	Wake County		35.7	-78.8	C		Liquidambar styraciflua	Altingiaceae	Tree (deciduous)	Picked from the plant or recently fallen	15.3	1100	120			1.45	0.43	0.1	0.04	0.5	0.16	0.94	0.87
678	Marchin et al (2010)	45	USA	NC	Wake County		35.7	-78.8	C		Liriodendron tulipifera	Magnoliaceae	Tree (deciduous)	Picked from the plant or recently fallen	15.3	1100	120			1.37	0.55	0.07	0.03	1.18	0.68	0.81	1.23
679	Marchin et al (2010)	45	USA	NC	Wake County		35.7	-78.8	C		Nyssa sylvatica	Cornaceae	Tree (deciduous)	Picked from the plant or recently fallen	15.3	1100	120			1.33	0.48	0.08	0.05	0.93	0.56	0.9	0.98
485	Martinez-Sanchez (2003)	46	Mexico	East Coast		Estacion de Biologia Los Tuxtlas	18.6	-95.1	A	Lowland evergreen tropical rain-forest	Cecropia obtusifolia	Urticaceae	Tree (evergreen)	Recently fallen leaves	25.1	4500	110			1.99	1.19	0.18	0.17
486	Martinez-Sanchez (2003)	46	Mexico	East Coast		Estacion de Biologia Los Tuxtlas	18.6	-95.1	A	Lowland evergreen tropical rain-forest	Heliocarpus appendiculatus	Malvaceae	Tree (evergreen)	Recently fallen leaves	25.1	4500	110			2.26	1.03	0.29	0.23
487	Martinez-Sanchez (2003)	46	Mexico	East Coast		Estacion de Biologia Los Tuxtlas	18.6	-95.1	A	Lowland evergreen tropical rain-forest	Trichospermum galeottii	Tiliaceae	Tree (evergreen)	Recently fallen leaves	25.1	4500	110			1.85	0.71	0.12	0.04
488	Martinez-Sanchez (2003)	46	Mexico	East Coast		Estacion de Biologia Los Tuxtlas	18.6	-95.1	A	Lowland evergreen tropical rain-forest	Ficus tecolutensis	Moraceae	Tree (deciduous)	Recently fallen leaves	25.1	4500	110			1.38	0.86	0.11	0.08
489	Martinez-Sanchez (2003)	46	Mexico	East Coast		Estacion de Biologia Los Tuxtlas	18.6	-95.1	A	Lowland evergreen tropical rain-forest	Ficus yoponensis	Moraceae	Tree (evergreen)	Recently fallen leaves	25.1	4500	110			2.08	0.99	0.15	0.08
490	Martinez-Sanchez (2003)	46	Mexico	East Coast		Estacion de Biologia Los Tuxtlas	18.6	-95.1	A	Lowland evergreen tropical rain-forest	Nectandra ambigens	Lauraceae	Tree (evergreen)	Recently fallen leaves	25.1	4500	110			1.68	1.01
491	Martinez-Sanchez (2003)	46	Mexico	East Coast		Estacion de Biologia Los Tuxtlas	18.6	-95.1	A	Lowland evergreen tropical rain-forest	Pseudolmedia oxyphyllaria	Moraceae	Tree (evergreen)	Recently fallen leaves	25.1	4500	110			1.54	1.28	0.11	0.08
492	Martinez-Sanchez (2003)	46	Mexico	East Coast		Estacion de Biologia Los Tuxtlas	18.6	-95.1	A	Lowland evergreen tropical rain-forest	Spondias radlkoferi	Anacardiaceae	Tree (deciduous)	Recently fallen leaves	25.1	4500	110			1.25	1.04	0.13	0.09
493	Martinez-Sanchez (2003)	46	Mexico	East Coast		Estacion de Biologia Los Tuxtlas	18.6	-95.1	A	Lowland evergreen tropical rain-forest	Faramea occidentalis	Rubiaceae	Tree (evergreen)	Recently fallen leaves	25.1	4500	110			1.4	1.25	0.11	0.08
494	Martinez-Sanchez (2003)	46	Mexico	East Coast		Estacion de Biologia Los Tuxtlas	18.6	-95.1	A	Lowland evergreen tropical rain-forest	Orthion oblanceolatum	Violaceae	Tree (evergreen)	Recently fallen leaves	25.1	4500	110			3.18	2.26
495	Martinez-Sanchez (2003)	46	Mexico	East Coast		Estacion de Biologia Los Tuxtlas	18.6	-95.1	A	Lowland evergreen tropical rain-forest	Rheedia edulis	Clusiaceae	Tree (evergreen)	Recently fallen leaves	25.1	4500	110			1.08	0.79	0.07	0.05
575	Mayor & Roda (1992)	47	Spain	Torrent de la Mina		Montseny mountains	41.8	2.4	C		Quercus ilex	Fagaceae	Tree (evergreen)	Litterfall	9.5	870	900			1.3	0.94	0.09	0.06	0.52	0.33			0.19	0.11
35	Mazzarino et al. (1998)	48	Argentina	Patagonia		Spring	-39.6	-71.4	C		Atriplex lampa	Chenopodiaceae	Tree (evergreen)	Picked from the plant	5.4	700	100			1.5	1	0.09	0.07	0.2	0.22	2.19	2.4
36	Mazzarino et al. (1998)	48	Argentina	Patagonia		Summer	-39.6	-71.4	C		Atriplex lampa	Chenopodiaceae	Tree (evergreen)	Picked from the plant	5.4	700	100			1.2	0.8	0.08	0.06	0.39	0.52	1.38	2.09
37	Mazzarino et al. (1998)	48	Argentina	Patagonia		Spring	-39.6	-71.4	C		Prosopis alpataco	N-fixer Fabaceae	Tree (deciduous)	Picked from the plant	5.4	700	100			2.1	1.5	0.15	0.1	0.39	0.43	1.06	2.99
38	Mazzarino et al. (1998)	48	Argentina	Patagonia		Summer	-39.6	-71.4	C		Prosopis alpataco	N-fixer Fabaceae	Tree (deciduous)	Picked from the plant	5.4	700	100			2.9	2.4			0.78	0.35	1.7	2.34
39	Mazzarino et al. (1998)	48	Argentina	Patagonia		Spring	-39.6	-71.4	C		Bromus setifolius	Poaceae	Graminoid	Picked from the plant	5.4	700	100	44.3	42.7	2	0.5	0.33	0.09	2.35	0.63	0.82	0.44
40	Mazzarino et al. (1998)	48	Argentina	Patagonia		Spring	-39.6	-71.4	C		Festuca pallescens	Poaceae	Graminoid	Picked from the plant	5.4	700	100	46.6	47.7	1	0.3	0.19	0.09	1.8	0.34	0.29	0.24
41	Mazzarino et al. (1998)	48	Argentina	Patagonia		Spring	-39.6	-71.4	C		Hordeum comosum	Poaceae	Graminoid	Picked from the plant	5.4	700	100	43.9	43.1	2.5	0.4	0.25	0.09	2.57	0.47	0.54	0.26
42	Mazzarino et al. (1998)	48	Argentina	Patagonia		Spring	-39.6	-71.4	C		Poa ligularis	Poaceae	Graminoid	Picked from the plant	5.4	700	100	47	45.4	1.1	0.2	0.23	0.05			0.25	0.23
703	Minoletti & Boerner (1993)	49	USA	OH	Hocking County	Neotoma Valley	39.6	-82.6	D	Mixed mesophytic forest	Polystichum acrostichoides	Dryopteridaceae	Ferns	Litterfall	11	1000	200			1.49	0.57	0.18	0.08
704	Minoletti & Boerner (1993)	49	USA	OH	Hocking County	Neotoma Valley	39.6	-82.6	D	Mixed oak forest	Polystichum acrostichoides	Dryopteridaceae	Ferns	Litterfall	11	1000	200			1.58	0.65	0.13	0.06
705	Minoletti & Boerner (1993)	49	USA	OH	Delaware County	Bohannan Woods	40.4	-82.9	D	Beech-maple forest	Polystichum acrostichoides	Dryopteridaceae	Ferns	Litterfall	11	1000	200			1.83	1.06	0.13	0.07
471	Nakanishi et al. (2009)	50	Japan	Kyoto Prefecture	Kyoto University	Kamigamo Experimental Station	35.1	135.8	C		Chamaecyparis obtusa	Cupressaceae	Conifers		14.6	1582	136			0.99	0.66
472	Nakanishi et al. (2009)	50	Japan	Kyoto Prefecture	Kyoto University	Kamigamo Experimental Station	35.1	135.8	C		Chamaecyparis obtusa	Cupressaceae	Conifers		14.6	1582	175			0.86	0.47
473	Nakanishi et al. (2009)	50	Japan	Kyoto Prefecture	Kyoto University	Kamigamo Experimental Station	35.1	135.8	C		Chamaecyparis obtusa	Cupressaceae	Conifers		14.6	1582	200			0.97	0.55
75	Nardoto et al. (2006)	51	Brazil	DF	Brasilia	Ecological Reserve of IBGE	-15.9	-47.9	A	Cerrado (savanna)	Kielmeyera coriacea	Clusiaceae	Tree (deciduous)	Litterfall traps cleared every 2 weeks	22	1400	1100			1.05	0.45	0.06	0.02
76	Nardoto et al. (2006)	51	Brazil	DF	Brasilia	Ecological Reserve of IBGE	-15.9	-47.9	A	Cerrado (savanna)	Caryocar brasiliense	Caryocaraceae	Tree (deciduous)	Litterfall traps cleared every 2 weeks	22	1400	1100			1.3	0.87	0.07	0.03
77	Nardoto et al. (2006)	51	Brazil	DF	Brasilia	Ecological Reserve of IBGE	-15.9	-47.9	A	Cerrado (savanna)	Qualea grandiflora	Vochysiaceae	Tree (deciduous)	Litterfall traps cleared every 2 weeks	22	1400	1100			1.12	1.07	0.06	0.05
78	Nardoto et al. (2006)	51	Brazil	DF	Brasilia	Ecological Reserve of IBGE	-15.9	-47.9	A	Cerrado (savanna)	Dalbergia miscolobium	N-fixer Fabaceae	Tree (deciduous)	Litterfall traps cleared every 2 weeks	22	1400	1100			1.8	1.51	0.06	0.03
79	Nardoto et al. (2006)	51	Brazil	DF	Brasilia	Ecological Reserve of IBGE	-15.9	-47.9	A	Cerrado (savanna)	Stryphnodendron adstringens	N-fixer Fabaceae	Tree (deciduous)	Litterfall traps cleared every 2 weeks	22	1400	1100			1.73	0.9	0.06	0.02
80	Nardoto et al. (2006)	51	Brazil	DF	Brasilia	Ecological Reserve of IBGE	-15.9	-47.9	A	Cerrado (savanna)	Roupala montana	Proteaceae	Tree (evergreen)	Litterfall traps cleared every 2 weeks	22	1400	1100			0.92	0.63	0.05	0.02
81	Nardoto et al. (2006)	51	Brazil	DF	Brasilia	Ecological Reserve of IBGE	-15.9	-47.9	A	Cerrado (savanna)	Vochysia elliptica	Vochysiaceae	Tree (evergreen)	Litterfall traps cleared every 2 weeks	22	1400	1100			0.73	0.56	0.04	0.03
82	Nardoto et al. (2006)	51	Brazil	DF	Brasilia	Ecological Reserve of IBGE	-15.9	-47.9	A	Cerrado (savanna)	Ouratea hexasperma	Ochnaceae	Tree (evergreen)	Litterfall traps cleared every 2 weeks	22	1400	1100			1.24	0.86	0.07	0.03
83	Nardoto et al. (2006)	51	Brazil	DF	Brasilia	Ecological Reserve of IBGE	-15.9	-47.9	A	Cerrado (savanna)	Sclerolobium paniculatum	N-fixer Fabaceae	Tree (evergreen)	Litterfall traps cleared every 2 weeks	22	1400	1100			1.34	0.95	0.06	0.02
84	Nardoto et al. (2006)	51	Brazil	DF	Brasilia	Ecological Reserve of IBGE	-15.9	-47.9	A	Cerrado (savanna)	Styrax ferrugineus	Styracaceae	Tree (evergreen)	Litterfall traps cleared every 2 weeks	22	1400	1100			1.2	0.83	0.06	0.04
85	Nardoto et al. (2006)	51	Brazil	DF	Brasilia	Ecological Reserve of IBGE	-15.9	-47.9	A	Cerrado (savanna)	Kielmeyera coriacea	Clusiaceae	Tree (deciduous)	Litterfall traps cleared every 2 weeks	22	1400	1100			0.81	0.61	0.05	0.03
86	Nardoto et al. (2006)	51	Brazil	DF	Brasilia	Ecological Reserve of IBGE	-15.9	-47.9	A	Cerrado (savanna)	Caryocar brasiliense	Caryocaraceae	Tree (deciduous)	Litterfall traps cleared every 2 weeks	22	1400	1100			1.12	0.7	0.07	0.03
87	Nardoto et al. (2006)	51	Brazil	DF	Brasilia	Ecological Reserve of IBGE	-15.9	-47.9	A	Cerrado (savanna)	Qualea grandiflora	Vochysiaceae	Tree (deciduous)	Litterfall traps cleared every 2 weeks	22	1400	1100			1.11	0.78	0.07	0.04
88	Nardoto et al. (2006)	51	Brazil	DF	Brasilia	Ecological Reserve of IBGE	-15.9	-47.9	A	Cerrado (savanna)	Dalbergia miscolobium	N-fixer Fabaceae	Tree (deciduous)	Litterfall traps cleared every 2 weeks	22	1400	1100			1.78	1.16	0.06	0.02
89	Nardoto et al. (2006)	51	Brazil	DF	Brasilia	Ecological Reserve of IBGE	-15.9	-47.9	A	Cerrado (savanna)	Stryphnodendron adstringens	N-fixer Fabaceae	Tree (deciduous)	Litterfall traps cleared every 2 weeks	22	1400	1100			1.35	0.9	0.06	0.02
90	Nardoto et al. (2006)	51	Brazil	DF	Brasilia	Ecological Reserve of IBGE	-15.9	-47.9	A	Cerrado (savanna)	Roupala montana	Proteaceae	Tree (evergreen)	Litterfall traps cleared every 2 weeks	22	1400	1100			0.72	0.52	0.04	0.02
91	Nardoto et al. (2006)	51	Brazil	DF	Brasilia	Ecological Reserve of IBGE	-15.9	-47.9	A	Cerrado (savanna)	Vochysia elliptica	Vochysiaceae	Tree (evergreen)	Litterfall traps cleared every 2 weeks	22	1400	1100			0.8	0.56	0.05	0.02
92	Nardoto et al. (2006)	51	Brazil	DF	Brasilia	Ecological Reserve of IBGE	-15.9	-47.9	A	Cerrado (savanna)	Ouratea hexasperma	Ochnaceae	Tree (evergreen)	Litterfall traps cleared every 2 weeks	22	1400	1100			1.05	0.78	0.07	0.02
93	Nardoto et al. (2006)	51	Brazil	DF	Brasilia	Ecological Reserve of IBGE	-15.9	-47.9	A	Cerrado (savanna)	Sclerolobium paniculatum	N-fixer Fabaceae	Tree (evergreen)	Litterfall traps cleared every 2 weeks	22	1400	1100			1.05	0.78	0.05	0.02
94	Nardoto et al. (2006)	51	Brazil	DF	Brasilia	Ecological Reserve of IBGE	-15.9	-47.9	A	Cerrado (savanna)	Styrax ferrugineus	Styracaceae	Tree (evergreen)	Litterfall traps cleared every 2 weeks	22	1400	1100			1.1	0.86	0.06	0.04
576	Nasholm (1994)	52	Sweden	Umea			64.3	19.8	D		Pinus sylvestris	Pinaceae	Conifers		3	600	260			0.98	0.54													25.2	22.4	11.1
918	Negi & Singh (1993)	53	India	Kumaun Himalaya			29.4	79.5	C		Acer oblongum	Sapindaceae	Tree (evergreen)		12	2000	1950			2.55	1.66															38.6
919	Negi & Singh (1993)	53	India	Kumaun Himalaya			29.4	79.5	C		Ilex dipyrena	Aquifoliaceae	Tree (evergreen)		12	2000	2000			1.84	1.55															29.3
920	Negi & Singh (1993)	53	India	Kumaun Himalaya			29.4	79.5	C		Litsea umbrosa	Lauraceae	Tree (evergreen)		12	2000	2200			3.16	1.99															31.2
921	Negi & Singh (1993)	53	India	Kumaun Himalaya			29.4	79.5	C		Machilus duthiei	Lauraceae	Tree (evergreen)		12	2000	2000			2.72	1.95															20.7
922	Negi & Singh (1993)	53	India	Kumaun Himalaya			29.4	79.5	C		Myrica esculenta	N-fixer Myricaceae	Tree (evergreen)		15	2000	1350			2.79	1.94															20.6
923	Negi & Singh (1993)	53	India	Kumaun Himalaya			29.4	79.5	C		Pinus roxburghii	Pinaceae	Conifers		15	2000	1350			1.62	1.02															28.2
924	Negi & Singh (1993)	53	India	Kumaun Himalaya			29.4	79.5	C		Quercus floribunda	Fagaceae	Tree (evergreen)		12	2000	2000			2.79	1.79															23.5
925	Negi & Singh (1993)	53	India	Kumaun Himalaya			29.4	79.5	C		Quercus lanuginosa	Fagaceae	Tree (evergreen)		12	2000	2200			2.7	1.83															20.5
926	Negi & Singh (1993)	53	India	Kumaun Himalaya			29.4	79.5	C		Quercus leucotrichophora	Fagaceae	Tree (evergreen)		12	2000	1950			2.9	1.56															20.9
927	Negi & Singh (1993)	53	India	Kumaun Himalaya			29.4	79.5	C		Rhododendron arboreum	Ericaceae	Tree (evergreen)		12	2000	2200			1.41	0.98															33.2
928	Negi & Singh (1993)	53	India	Kumaun Himalaya			29.4	79.5	C		Shorea robusta	Dipterocarpaceae	Tree (evergreen)		23	2000	600			2.61	1.19															21
929	Negi & Singh (1993)	53	India	Kumaun Himalaya			29.4	79.5	C		Aesculus indica	Sapindaceae	Tree (deciduous)		12	2000	1950			2.68	1.36															28.4
930	Negi & Singh (1993)	53	India	Kumaun Himalaya			29.4	79.5	C		Alnus nepalensis	N-fixer Betulaceae	Tree (deciduous)		15	2000	1350			4.52	3.15															27.3
931	Negi & Singh (1993)	53	India	Kumaun Himalaya			29.4	79.5	C		Bauhinia variegata	N-fixer Fabaceae	Tree (deciduous)		15	2000	1450			2.89	1.76															30.3
932	Negi & Singh (1993)	53	India	Kumaun Himalaya			29.4	79.5	C		Engelhardia colebrookiana	Juglandaceae	Tree (deciduous)		15	2000	1350			2.82	1.58															40.2
933	Negi & Singh (1993)	53	India	Kumaun Himalaya			29.4	79.5	C		Fraxinus micrantha	Oleaceae	Tree (deciduous)		12	2000	1950			3.25	1.3															38.7
934	Negi & Singh (1993)	53	India	Kumaun Himalaya			29.4	79.5	C		Ficus palmata	Moraceae	Tree (deciduous)		15	2000	1450			3.78	2.38															26.4
935	Negi & Singh (1993)	53	India	Kumaun Himalaya			29.4	79.5	C		Grewia optiva	Malvaceae	Tree (deciduous)		15	2000	1450			4.18	2.54															24.4
936	Negi & Singh (1993)	53	India	Kumaun Himalaya			29.4	79.5	C		Prunus cerasoides	Rosaceae	Tree (deciduous)		15	2000	1450			3.07	2.5															34.4
937	Negi & Singh (1993)	53	India	Kumaun Himalaya			29.4	79.5	C		Populus ciliata	Salicaceae	Tree (deciduous)		12	2000	2000			2.64	1.27															25.2
938	Negi & Singh (1993)	53	India	Kumaun Himalaya			29.4	79.5	C		Pyrus pashia	Rosaceae	Tree (deciduous)		15	2000	1450			2.28	2.04															25.8
939	Negi & Singh (1993)	53	India	Kumaun Himalaya			29.4	79.5	C		Populus deltoides	Salicaceae	Tree (deciduous)		12	2000	1800			2.86	1.65															21.4
940	Negi & Singh (1993)	53	India	Kumaun Himalaya			29.4	79.5	C		Salix alba	Salicaceae	Tree (deciduous)		12	2000	1750			3.44	2.38															41
941	Negi & Singh (1993)	53	India	Kumaun Himalaya			29.4	79.5	C		Sapium insigne	Euphorbiaceae	Tree (deciduous)		23	2000	600			2.91	2.36															30
942	Negi & Singh (1993)	53	India	Kumaun Himalaya			29.4	79.5	C		Sapium sebiferum	Euphorbiaceae	Tree (deciduous)		15	2000	1350			3.34	1.68															32.9
943	Negi & Singh (1993)	53	India	Kumaun Himalaya			29.4	79.5	C		Tectona grandis	Lamiaceae	Tree (deciduous)		23	2000	600			3.05	1.79															48.7
47	Oyarzabal et al. (2008)	54	Argentina			North America species	-34.6	-58.5	C	Northern mixed prairie	Agropyrum smithii	Poaceae	Graminoid	Picked from the plant	8.5	500	115			2.81	0.89									75.8
48	Oyarzabal et al. (2008)	54	Argentina			North America species	-34.6	-58.5	C	Southern mixed prairie	Bouteloua curtipendula	Poaceae	Graminoid	Picked from the plant	17	650	115			2.84	1.02									53.4
49	Oyarzabal et al. (2008)	54	Argentina			South America species	-34.6	-58.5	C	Patagonia	Bromus setifolius	Poaceae	Graminoid	Picked from the plant	6	400	115			3.45	1.61									59.6
50	Oyarzabal et al. (2008)	54	Argentina			North America species	-34.6	-58.5	C	Shortgrass steppe	Buchloe dactyloides	Poaceae	Graminoid	Picked from the plant	15	550	115			3.2	0.74									56.8
51	Oyarzabal et al. (2008)	54	Argentina			North America species	-34.6	-58.5	C	Shortgrass steppe	Hilaria jamesii	Poaceae	Graminoid	Picked from the plant	11	300	115			2.21	0.58									57.3
52	Oyarzabal et al. (2008)	54	Argentina			South America species	-34.6	-58.5	C	Patagonia	Hordeum comosum	Poaceae	Graminoid	Picked from the plant	6	250	115			3.45	1.16									41.2
53	Oyarzabal et al. (2008)	54	Argentina			South America species	-34.6	-58.5	C	Flooding Pampa	Paspalum dilatatum	Poaceae	Graminoid	Picked from the plant	15	900	115			2.46	0.64									39.8
54	Oyarzabal et al. (2008)	54	Argentina			South America species	-34.6	-58.5	C	Patagonia	Poa ligularis	Poaceae	Graminoid	Picked from the plant	8	175	115			2.81	1.01									103.8
55	Oyarzabal et al. (2008)	54	Argentina			North America species	-34.6	-58.5	C	Tallgrass prairie	Schizachyrium scoparium	Poaceae	Graminoid	Picked from the plant	18	950	115			3.16	0.41									48.3
56	Oyarzabal et al. (2008)	54	Argentina			North America species	-34.6	-58.5	C	Northern mixed prairie	Stipa comata	Poaceae	Graminoid	Picked from the plant	5	500	115			3.54	1.19									57.6
57	Oyarzabal et al. (2008)	54	Argentina			South America species	-34.6	-58.5	C	Patagonia	Stipa humilis	Poaceae	Graminoid	Picked from the plant	8	125	115			2.6	1.39									66
58	Oyarzabal et al. (2008)	54	Argentina			North America species	-34.6	-58.5	C	Northern mixed prairie	Stipa viridula	Poaceae	Graminoid	Picked from the plant	8	550	115			3.42	0.82									53.3
43	Palma et al. (2000)	55	Argentina	Chaco Province	Colonia Benitez	Estricta Natural Reservation	-27.5	-58	C	Subtropical forest	Gleditsia amorphoides	N-fixer Fabaceae	Tree (evergreen)	Recently fallen leaves	21.5	1300	51			4.31	2.63	0.45	0.21	1.73	0.76	1.29	2.92	0.13	0.2
44	Palma et al. (2000)	55	Argentina	Chaco Province	Colonia Benitez	Estricta Natural Reservation	-27.5	-58	C	Subtropical forest	Patagonula americana	Boraginaceae	Tree (deciduous)	Recently fallen leaves	21.5	1300	51			2.18	2.18	0.13	0.11	1.17	0.68	2.74	2.7	0.34	0.33
45	Palma et al. (2000)	55	Argentina	Chaco Province	Colonia Benitez	Estricta Natural Reservation	-27.5	-58	C	Subtropical forest	Chlorophora tinctoria	Moraceae	Tree (deciduous)	Recently fallen leaves	21.5	1300	51			2.48	2.37	0.26	0.21	1.13	0.7	3.61	4.41	0.41	0.41
46	Palma et al. (2000)	55	Argentina	Chaco Province	Colonia Benitez	Estricta Natural Reservation	-27.5	-58	C	Subtropical forest	Astronium balansae	Anacardiaceae	Tree (deciduous)	Recently fallen leaves	21.5	1300	51			2.58	1.86	0.33	0.22	0.89	0.62	1.98	2.04	0.3	0.31
465	Pandey et al. (2007)	56	India	Maharabi hillock			24.9	93.9	C	Natural oak forest	Quercus serrata	Fagaceae	Tree (deciduous)	Litterfall traps cleared monthly	22	1384	840			1.88	0.98	0.1	0.06	1.05	0.66
177	Perez et al. (2003)	57	Chile			Chiloe National Park	-42.5	-74	C	Evergreen temperate greenforests	Fitzroya cupressoides	Cupressaceae	Conifers	Litterfall traps cleared monthly	10	5500	620	55.51	62.37	0.87	0.55
178	Perez et al. (2003)	57	Chile			Chiloe National Park	-42.5	-74	C	Evergreen temperate greenforests	Tepualia stipularis	Myrtaceae	Tree (evergreen)	Litterfall traps cleared monthly	10	5500	620	52.03	49.6	0.78	0.5
179	Perez et al. (2003)	57	Chile			Chiloe National Park	-42.5	-74	C	Evergreen temperate greenforests	Pilgerodendron uviferum	Cupressaceae	Conifers	Litterfall traps cleared monthly	10	5500	620	52.42	55.77	1.12	0.73
180	Perez et al. (2003)	57	Chile			Chiloe National Park	-42.5	-74	C	Evergreen temperate greenforests	Drimys winteri	Winteraceae	Tree (evergreen)	Litterfall traps cleared monthly	10	5500	620	50.54	62.73	0.97	0.87
181	Perez et al. (2003)	57	Chile			Chiloe National Park	-42.5	-74	C	Evergreen temperate greenforests	Nothofagus nitida	Nothofagaceae	Tree (evergreen)	Litterfall traps cleared monthly	10	5500	620	51.57	50.72	1.07	0.79
182	Perez et al. (2003)	57	Chile			Chiloe National Park	-42.5	-74	C	Evergreen temperate greenforests	Podocarpus nubigena	Podocarpaceae	Tree (evergreen)	Litterfall traps cleared monthly	10	5500	620	49.49	55.18	1.13	1.14
183	Perez et al. (2003)	57	Chile			Chiloe National Park	-42.5	-74	C	Evergreen temperate greenforests	Amomyrtus luna	Myrtaceae	Tree (evergreen)	Litterfall traps cleared monthly	10	5500	620	49.13	50.99	1.14	1.06
184	Perez et al. (2003)	57	Chile			Chiloe National Park	-42.5	-74	C	Evergreen temperate greenforests	Laurelia philippiana	Monimiaceae	Tree (evergreen)	Litterfall traps cleared monthly	10	5500	620	47.43	57.95	1.67	1.41
17	Peri & Lasagno (2010)	58	Argentina	Patagonia		small plant	-50	-70	B	Magellanic Patagonian steppe	Festuca pallescens	Poaceae	Graminoid	Picked from the plant	7	300	115	41.01	38.35	1.7	0.5	0.19	0.05	1.46	0.2	0.27	0.24	0.1	0.09
18	Peri & Lasagno (2010)	58	Argentina	Patagonia		big plant	-50	-70	B	Magellanic Patagonian steppe	Festuca pallescens	Poaceae	Graminoid	Picked from the plant	7	300	115	42.35	39.3	1.31	0.47	0.16	0.04	1.33	0.22	0.29	0.24	0.1	0.08
19	Peri & Lasagno (2010)	58	Argentina	Patagonia		small plant	-50	-70	B	Magellanic Patagonian steppe	Stipa chrysophylla	Poaceae	Graminoid	Picked from the plant	7	300	115	42.51	39.97	1.37	0.54	0.12	0.02	0.68	0.2	0.26	0.21	0.13	0.07
20	Peri & Lasagno (2010)	58	Argentina	Patagonia		big plant	-50	-70	B	Magellanic Patagonian steppe	Stipa chrysophylla	Poaceae	Graminoid	Picked from the plant	7	300	115	44.83	41.8	1.17	0.53	0.1	0.02	0.62	0.18	0.29	0.24	0.08	0.07
21	Peri & Lasagno (2010)	58	Argentina	Patagonia		small plant	-50	-70	B	Magellanic Patagonian steppe	Poa dusenni	Poaceae	Graminoid	Picked from the plant	7	300	115	42.27	39.52	1.74	0.48	0.19	0.05	1.1	0.18	0.23	0.2	0.09	0.08
22	Peri & Lasagno (2010)	58	Argentina	Patagonia		big plant	-50	-70	B	Magellanic Patagonian steppe	Poa dusenni	Poaceae	Graminoid	Picked from the plant	7	300	115	44.32	41.4	1.28	0.47	0.18	0.04	0.93	0.12	0.3	0.26	0.08	0.07
23	Peri & Lasagno (2010)	58	Argentina	Patagonia		small plant	-50	-70	B	Magellanic Patagonian steppe	Carex andina	Cyperaceae	Graminoid	Picked from the plant	7	300	115	43.45	40.6	1.92	0.49	0.15	0.05	1.06	0.16	0.22	0.17	0.1	0.08
24	Peri & Lasagno (2010)	58	Argentina	Patagonia		big plant	-50	-70	B	Magellanic Patagonian steppe	Carex andina	Cyperaceae	Graminoid	Picked from the plant	7	300	115	44.65	40.87	1.44	0.49	0.13	0.04	1.02	0.15	0.31	0.23	0.09	0.08
660	Pugnaire & Chapin (1993)	59	USA	CA	Knoxville		38.8	-122.3	C	Mediterranean evergreen species	Trees		Trees		16	825	375			1.53	0.71	0.19	0.09													17
661	Pugnaire & Chapin (1993)	59	USA	CA	Butts Canyon		38.7	-122.4	C	Mediterranean evergreen species	Trees		Trees		16	825	200			1.14	0.35	0.11	0.05													5
588	Quested et al. (2002)	60	Sweden			Abisko Scientific Research Station	68.4	18.8	D		Bartsia alpina	Orobanchaceae	Forb	Picked from the plant	-0.8	320	360			2.85	2
589	Quested et al. (2002)	60	Sweden			Abisko Scientific Research Station	68.4	18.8	D		Pedicularis lapponica	Scrophulariaceae	Forb	Picked from the plant	-0.8	320	360			4.18	1.81
590	Quested et al. (2002)	60	Sweden			Abisko Scientific Research Station	68.4	18.8	D		Pedicularis hirsuta	Scrophulariaceae	Forb	Picked from the plant	-0.8	320	360			2.77	2.51
591	Quested et al. (2002)	60	Sweden			Abisko Scientific Research Station	68.4	18.8	D		Pedicularis sceptrum-carolinum	Scrophulariaceae	Forb	Picked from the plant	-0.8	320	360			1.55	1.48
592	Quested et al. (2002)	60	Sweden			Abisko Scientific Research Station	68.4	18.8	D		Euphrasia frigida	Orobanchaceae	Forb	Picked from the plant	-0.8	320	360			4.89	4.1
593	Quested et al. (2002)	60	Sweden			Abisko Scientific Research Station	68.4	18.8	D		Vaccinium uliginosum	Ericaceae	Tree (deciduous)	Picked from the plant	-0.8	320	360			1.72	0.48
594	Quested et al. (2002)	60	Sweden			Abisko Scientific Research Station	68.4	18.8	D		Vaccinium vitis-idaea	Ericaceae	Tree (evergreen)	Picked from the plant	-0.8	320	360			0.91	0.83
595	Quested et al. (2002)	60	Sweden			Abisko Scientific Research Station	68.4	18.8	D		Betula nana	Betulaceae	Tree (deciduous)	Picked from the plant	-0.8	320	360			2.53	0.74
596	Quested et al. (2002)	60	Sweden			Abisko Scientific Research Station	68.4	18.8	D		Empetrum hermaphroditum	Ericaceae	Tree (evergreen)	Picked from the plant	-0.8	320	360			1	0.69
597	Quested et al. (2002)	60	Sweden			Abisko Scientific Research Station	68.4	18.8	D		Calamagrostis lapponica	Poaceae	Graminoid	Picked from the plant	-0.8	320	360			1.47	0.48
598	Quested et al. (2002)	60	Sweden			Abisko Scientific Research Station	68.4	18.8	D		Carex vaginata	Cyperaceae	Graminoid	Picked from the plant	-0.8	320	360			1.61	0.74
599	Quested et al. (2002)	60	Sweden			Abisko Scientific Research Station	68.4	18.8	D		Carex capitata	Cyperaceae	Graminoid	Picked from the plant	-0.8	320	360			1.71	0.84
600	Quested et al. (2002)	60	Sweden			Abisko Scientific Research Station	68.4	18.8	D		Polygonum viviparum	Polygonaceae	Forb	Picked from the plant	-0.8	320	360			2.79	0.77
601	Quested et al. (2002)	60	Sweden			Abisko Scientific Research Station	68.4	18.8	D		Rubus chamaemorus	Rosaceae	Forb	Picked from the plant	-0.8	320	360			2.83	0.59
859	Ralhan & Singh (1987)	61	India	Kumaun Himalaya	Naini Tal district		29.4	79.7	C		Shorea robusta	Dipterocarpaceae	Tree (evergreen)		23	2000	350																			20.4
860	Ralhan & Singh (1987)	61	India	Kumaun Himalaya	Naini Tal district		29.4	79.7	C		Mallotus philippensis	Euphorbiaceae	Tree (evergreen)		23	2000	350																			11.8
861	Ralhan & Singh (1987)	61	India	Kumaun Himalaya	Naini Tal district		29.4	79.7	C		Murraya peniculata	Rutaceae	Tree (evergreen)		23	2000	350																			19.9
862	Ralhan & Singh (1987)	61	India	Kumaun Himalaya	Naini Tal district		29.4	79.7	C		Pinus roxburghii	Pinaceae	Conifers		15	2000	1500																			22.8
863	Ralhan & Singh (1987)	61	India	Kumaun Himalaya	Naini Tal district		29.4	79.7	C		Symplocos ramosissima	Symplocaceae	Tree (deciduous)		15	2000	1500																			21.5
864	Ralhan & Singh (1987)	61	India	Kumaun Himalaya	Naini Tal district		29.4	79.7	C		Glochidion velutinum	Euphorbiaceae	Tree (deciduous)		15	2000	1500																			28.4
865	Ralhan & Singh (1987)	61	India	Kumaun Himalaya	Naini Tal district		29.4	79.7	C		Quercus leucotrichophora	Fagaceae	Tree (evergreen)		13	2000	2150																			16.5
866	Ralhan & Singh (1987)	61	India	Kumaun Himalaya	Naini Tal district		29.4	79.7	C		Myrica esculenta	N-fixer Myricaceae	Tree (evergreen)		13	2000	2150																			18.6
867	Ralhan & Singh (1987)	61	India	Kumaun Himalaya	Naini Tal district		29.4	79.7	C		Myrsine semiserrata	Myrsinaceae	Tree (evergreen)		13	2000	2150																			15.1
868	Ralhan & Singh (1987)	61	India	Kumaun Himalaya	Naini Tal district		29.4	79.7	C		Quercus floribunda	Fagaceae	Tree (evergreen)		13	2000	2150																			12.3
869	Ralhan & Singh (1987)	61	India	Kumaun Himalaya	Naini Tal district		29.4	79.7	C		Quercus lanuginosa	Fagaceae	Tree (evergreen)		13	2000	2150																			12.8
870	Ralhan & Singh (1987)	61	India	Kumaun Himalaya	Naini Tal district		29.4	79.7	C		Lyonia ovalifolia	Ericaceae	Tree (deciduous)		13	2000	2150																			34.1
871	Ralhan & Singh (1987)	61	India	Kumaun Himalaya	Naini Tal district		29.4	79.7	C		Viburnum cotinifolium	Caprifoliaceae	Tree (deciduous)		13	2000	2150																			29.7
534	Ratnam et al. (2008)	62	South Africa	North-eastern		Kruger National Park	-23.9	31.6	A	Well-wooded savanna	Grasses		Graminoid	Picked from the plant or recently fallen	22.5	550	550			1.84	1.02	0.24	0.08
535	Ratnam et al. (2008)	62	South Africa	North-eastern		Kruger National Park	-23.9	31.6	A	Well-wooded savanna	Broad leaf trees		Trees	Picked from the plant or recently fallen	22.5	550	550			1.99	1.18	0.17	0.08
536	Ratnam et al. (2008)	62	South Africa	North-eastern		Kruger National Park	-23.9	31.6	A	Well-wooded savanna	Fine leaf trees		Trees	Picked from the plant or recently fallen	22.5	550	550			2.86	1.81	0.17	0.07
820	Reich et al. (1995)	63	Venezuela		San Carlos de Rio Negro	Cultivated	1.9	-67.1	A	Amazon Forest	Manihot esculenta	Euphorbiaceae	Tree (evergreen)	Litterfall traps cleared every 2 weeks	26	3565	100			3.98	1.75	0.25	0.07
821	Reich et al. (1995)	63	Venezuela		San Carlos de Rio Negro	Colonizer	1.9	-67.1	A	Amazon Forest	Cecropia ficifolia	Urticaceae	Tree (evergreen)	Litterfall traps cleared every 2 weeks	26	3565	100			2.47	1.11	0.11	0.03
822	Reich et al. (1995)	63	Venezuela		San Carlos de Rio Negro	Colonizer	1.9	-67.1	A	Amazon Forest	Solanum straminifolia	Solanaceae	Tree (evergreen)	Litterfall traps cleared every 2 weeks	26	3565	100			3.92	2.08
823	Reich et al. (1995)	63	Venezuela		San Carlos de Rio Negro	Early succession	1.9	-67.1	A	Amazon Forest	Bellucia grossularioides	Melastomataceae	Tree (evergreen)	Litterfall traps cleared every 2 weeks	26	3565	100			1.69	0.88	0.06	0.02
824	Reich et al. (1995)	63	Venezuela		San Carlos de Rio Negro	Early succession	1.9	-67.1	A	Amazon Forest	Clidemia sericea	Melastomataceae	Tree (evergreen)	Litterfall traps cleared every 2 weeks	26	3565	100			1.65	1.01	0.08	0.04
825	Reich et al. (1995)	63	Venezuela		San Carlos de Rio Negro	Early succession	1.9	-67.1	A	Amazon Forest	Vismia japurensis	Clusiaceae	Tree (evergreen)	Litterfall traps cleared every 2 weeks	26	3565	100			1.64	0.87	0.09	0.03
826	Reich et al. (1995)	63	Venezuela		San Carlos de Rio Negro	Late succession	1.9	-67.1	A	Amazon Forest	Cabari	N-fixer Leguminosae	Trees	Litterfall traps cleared every 2 weeks	26	3565	100			2.22	1.35	0.07	0.04
827	Reich et al. (1995)	63	Venezuela		San Carlos de Rio Negro	Late succession	1.9	-67.1	A	Amazon Forest	Licania heteromorpha	Chrysobalanaceae	Tree (evergreen)	Litterfall traps cleared every 2 weeks	26	3565	100			1.25	0.83	0.06	0.02
828	Reich et al. (1995)	63	Venezuela		San Carlos de Rio Negro	Late succession	1.9	-67.1	A	Amazon Forest	Ocotea costulata	Lauraceae	Tree (evergreen)	Litterfall traps cleared every 2 weeks	26	3565	100			1.6	1.12	0.07	0.03
829	Reich et al. (1995)	63	Venezuela		San Carlos de Rio Negro	Late succession	1.9	-67.1	A	Amazon Forest	Protium sp.	Burseraceae	Tree (evergreen)	Litterfall traps cleared every 2 weeks	26	3565	100			1.69	1.12	0.08	0.03
501	Richardson et al. (2005)	64	New Zealand	South Island	Central Westland		-43	170	C		Angiosperms		Trees	Recently fallen leaves	10	5000	0			1.15	0.54	0.1	0.05
502	Richardson et al. (2005)	64	New Zealand	South Island	Central Westland		-43	170	C		Conifers	Conifers	Conifers	Recently fallen leaves	10	5000	0			0.92	0.57	0.11	0.05
503	Richardson et al. (2005)	64	New Zealand	South Island	Central Westland		-43	170	C		Ferns		Ferns	Recently fallen leaves	10	5000	0			1.76	0.83	0.15	0.06
876	Richardson et al. (2008)	65	New Zealand	North Island	Whakatane River		-38.6	176.9	C	Cool-temperate rainforest	Beilschmiedia tawa	Lauraceae	Tree (evergreen)		9	1545	600			1.37	0.65	0.11	0.04
877	Richardson et al. (2008)	65	New Zealand	North Island	Whakatane River		-38.6	176.9	C	Cool-temperate rainforest	Dacrydium cupressinum	Podocarpaceae	Conifers		9	1545	600			0.91	0.71	0.09	0.05
878	Richardson et al. (2008)	65	New Zealand	North Island	Whakatane River		-38.6	176.9	C	Cool-temperate rainforest	Melicytus ramiflorus	Violaceae	Tree (evergreen)		9	1545	600			2.36	1.16	0.23	0.1
879	Richardson et al. (2008)	65	New Zealand	North Island	Whakatane River		-38.6	176.9	C	Cool-temperate rainforest	Cyathea smithii	Cyatheaceae	Ferns		9	1545	600			1.72	1.12	0.17	0.1
880	Richardson et al. (2008)	65	New Zealand	North Island	Whakatane River		-38.6	176.9	C	Cool-temperate rainforest	Dicksonia squarrosa	Dicksoniaceae	Ferns		9	1545	600			1.45	1.03	0.16	0.08
881	Richardson et al. (2008)	65	New Zealand	North Island	Whakatane River		-38.6	176.9	C	Cool-temperate rainforest	Dicksonia fribrosa	Dicksoniaceae	Ferns		9	1545	600			1.7	1.48	0.21	0.1
882	Richardson et al. (2008)	65	New Zealand	North Island	Whakatane River		-38.6	176.9	C	Cool-temperate rainforest	Blechnum discolor	Blechnaceae	Ferns		9	1545	600			0.97	0.52	0.12	0.04
883	Richardson et al. (2008)	65	New Zealand	North Island	Whakatane River		-38.6	176.9	C	Cool-temperate rainforest	Blechnum fluviatile	Blechnaceae	Ferns		9	1545	600			1.5	1.08	0.2	0.11
884	Richardson et al. (2008)	65	New Zealand	North Island	Whakatane River		-38.6	176.9	C	Cool-temperate rainforest	Leptopteris hymenophylloides	Osmundaceae	Ferns		9	1545	600			1.46	1.11	0.15	0.08
885	Richardson et al. (2008)	65	New Zealand	North Island	Whakatane River		-38.6	176.9	C	Cool-temperate rainforest	Blechnum chambersii	Blechnaceae	Ferns		9	1545	600			1.7	1.08	0.25	0.11
886	Richardson et al. (2008)	65	New Zealand	North Island	Whakatane River		-38.6	176.9	C	Cool-temperate rainforest	Polystichum wawranum	Dryopteridaceae	Ferns		9	1545	600			1.57	1.27	0.2	0.09
323	Sariyildiz & Anderson (2005)	66	England	Devon		High Fertility	50.4	-3.7	C		Fagus sylvatica	Fagaceae	Tree (deciduous)	Litterfall	10.5	1000	200	46.7	46.1	2.39	1.23	0.18	0.08	1.03	0.19	0.77	1	0.18	0.16
324	Sariyildiz & Anderson (2005)	66	England	Devon		High Fertility	50.4	-3.7	C		Fagus sylvatica	Fagaceae	Tree (deciduous)	Litterfall	10.5	1000	200	47	44.6	2.46	1.35	0.17	0.06	0.97	0.17	0.75	0.87	0.17	0.13
325	Sariyildiz & Anderson (2005)	66	England	Devon		Low Fertility	50.4	-3.7	C		Fagus sylvatica	Fagaceae	Tree (deciduous)	Litterfall	10.5	1000	200	45.3	44.4	2.66	1.14			0.67	0.26	0.83	1.36	0.25	0.25
326	Sariyildiz & Anderson (2005)	66	England	Devon		Low Fertility	50.4	-3.7	C		Fagus sylvatica	Fagaceae	Tree (deciduous)	Litterfall	10.5	1000	200	46.8	45	2.65	1.01			0.85	0.24	0.89	1.14	0.25	0.25
327	Sariyildiz & Anderson (2005)	66	England	Devon		High Fertility	50.4	-3.7	C		Quercus robur	Fagaceae	Tree (deciduous)	Litterfall	10.5	1000	200	46.8	48	2.87	1.39	0.26	0.12	1.19	0.25	0.86	1.45	1.17	0.16
328	Sariyildiz & Anderson (2005)	66	England	Devon		High Fertility	50.4	-3.7	C		Quercus robur	Fagaceae	Tree (deciduous)	Litterfall	10.5	1000	200	47.9	47.6	2.91	1.41	0.25	0.14	1.23	0.29	0.83	1.33	0.15	0.16
329	Sariyildiz & Anderson (2005)	66	England	Devon		Low Fertility	50.4	-3.7	C		Quercus robur	Fagaceae	Tree (deciduous)	Litterfall	10.5	1000	200	45.3	47.3	2.32	1.49	0.16	0.05	1.02	0.15	0.74	0.97	0.23	0.12
330	Sariyildiz & Anderson (2005)	66	England	Devon		Low Fertility	50.4	-3.7	C		Quercus robur	Fagaceae	Tree (deciduous)	Litterfall	10.5	1000	200	45.3	47.4	2.37	1.53	0.17	0.05	1	0.13	0.77	1.18	0.22	0.12
331	Sariyildiz & Anderson (2005)	66	England	Devon		High Fertility	50.4	-3.7	C		Castanea sativa	Fagaceae	Tree (deciduous)	Litterfall	10.5	1000	200	47	47	2.36	1.1	0.25	0.09	0.94	0.23	0.75	1.12	0.32	0.24
332	Sariyildiz & Anderson (2005)	66	England	Devon		High Fertility	50.4	-3.7	C		Castanea sativa	Fagaceae	Tree (deciduous)	Litterfall	10.5	1000	200	47.9	47.1	2.45	1.14	0.17	0.08	0.91	0.17	0.7	1.02	0.28	0.2
333	Sariyildiz & Anderson (2005)	66	England	Devon		High Fertility	50.4	-3.7	C		Castanea sativa	Fagaceae	Tree (deciduous)	Litterfall	10.5	1000	200	45.9	47.5	2.72	1.23	0.13	0.05	0.71	0.11	0.96	0.8	0.22	0.16
98	Scott et al. (1992)	67	Brazil	RR	Maraca Island		3.3	-61.3	A	Amazon Forest	Brosimum lactescens	Moraceae	Tree (evergreen)	Litterfall traps cleared every 2 weeks	31.6	2300	150			1.91	1.3	0.1	0.05	0.78	0.39	0.56	0.58	0.23	0.14
99	Scott et al. (1992)	67	Brazil	RR	Maraca Island		3.3	-61.3	A	Amazon Forest	Duguetia lucida	Annonaceae	Tree (evergreen)	Litterfall traps cleared every 2 weeks	31.6	2300	150			2.53	1.64	0.14	0.06	0.93	0.34	0.39	0.31	0.21	0.29
100	Scott et al. (1992)	67	Brazil	RR	Maraca Island		3.3	-61.3	A	Amazon Forest	Lecythis corrugata	Lecythidaceae	Tree (evergreen)	Litterfall traps cleared every 2 weeks	31.6	2300	150			1.93	1.13	0.16	0.06	1.25	0.41	0.19	0.41	0.13	0.22
101	Scott et al. (1992)	67	Brazil	RR	Maraca Island		3.3	-61.3	A	Amazon Forest	Licania kunthiana	Chrysobalanaceae	Tree (evergreen)	Litterfall traps cleared every 2 weeks	31.6	2300	150			2.13	1.23	0.1	0.05	0.69	0.31	0.42	0.48	0.23	0.26
102	Scott et al. (1992)	67	Brazil	RR	Maraca Island		3.3	-61.3	A	Amazon Forest	Pouteria hispida	Sapotaceae	Tree (evergreen)	Litterfall traps cleared every 2 weeks	31.6	2300	150			1.75	1.17	0.09	0.04	1.02	0.29	0.3	0.33	0.14	0.2
103	Scott et al. (1992)	67	Brazil	RR	Maraca Island		3.3	-61.3	A	Amazon Forest	Tetragastris panamensis	Burseraceae	Tree (evergreen)	Litterfall traps cleared every 2 weeks	31.6	2300	150			1.36	0.89	0.08	0.04	0.85	0.35	0.42	0.56	0.16	0.2
135	Small (1972)	68	Canada	Ontario	Ottawa	Mer Bleue	45.4	-75.7	D	Temperate Forest	Acer rubrum	Sapindaceae	Tree (deciduous)	Picked from the plant	5.5	898	70			2.11	1.02	0.09	0.03	0.46	0.22
136	Small (1972)	68	Canada	Ontario	Ottawa	Mer Bleue	45.4	-75.7	D	Temperate Forest	Alnus rugosa	N-fixer Betulaceae	Tree (deciduous)	Picked from the plant	5.5	898	70			2.53	2.37	0.1	0.06	0.81	0.17
137	Small (1972)	68	Canada	Ontario	Ottawa	Mer Bleue	45.4	-75.7	D	Temperate Forest	Andromeda glaucophylla	Ericaceae	Tree (evergreen)	Picked from the plant	5.5	898	70			1.14	0.42	0.06	0.02	0.58	0.11
138	Small (1972)	68	Canada	Ontario	Ottawa	Mer Bleue	45.4	-75.7	D	Temperate Forest	Aronia melanocarpa	Rosaceae	Tree (deciduous)	Picked from the plant	5.5	898	70			1.74	0.8	0.14	0.04	1.06	0.15
139	Small (1972)	68	Canada	Ontario	Ottawa	Mer Bleue	45.4	-75.7	D	Temperate Forest	Betula populifolia	Betulaceae	Tree (deciduous)	Picked from the plant	5.5	898	70			1.79	0.83	0.1	0.05	0.55	0.12
140	Small (1972)	68	Canada	Ontario	Ottawa	Mer Bleue	45.4	-75.7	D	Temperate Forest	Betula pumila	Betulaceae	Tree (deciduous)	Picked from the plant	5.5	898	70			1.81	1.39	0.11	0.06	0.47	0.05
141	Small (1972)	68	Canada	Ontario	Ottawa	Mer Bleue	45.4	-75.7	D	Temperate Forest	Chamaedaphne calyculata	Ericaceae	Tree (evergreen)	Picked from the plant	5.5	898	70			1.36	0.75	0.08	0.03	0.39	0.03
142	Small (1972)	68	Canada	Ontario	Ottawa	Mer Bleue	45.4	-75.7	D	Temperate Forest	Comptonia peregrina	N-fixer Myricaceae	Tree (deciduous)	Picked from the plant	5.5	898	70			2.21	1.89	0.08	0.04	0.65	0.07
143	Small (1972)	68	Canada	Ontario	Ottawa	Mer Bleue	45.4	-75.7	D	Temperate Forest	Gaylussacia baccata	Ericaceae	Tree (deciduous)	Picked from the plant	5.5	898	70			1.66	0.53	0.08	0.02	0.68	0.05
144	Small (1972)	68	Canada	Ontario	Ottawa	Mer Bleue	45.4	-75.7	D	Temperate Forest	Ilex verticillata	Aquifoliaceae	Tree (deciduous)	Picked from the plant	5.5	898	70			2.53	2.5	0.1	0.09	1.38	0.42
145	Small (1972)	68	Canada	Ontario	Ottawa	Mer Bleue	45.4	-75.7	D	Temperate Forest	Kalmia angustifolia	Ericaceae	Tree (evergreen)	Picked from the plant	5.5	898	70			1.22	0.5	0.07	0.03	0.49	0.08
146	Small (1972)	68	Canada	Ontario	Ottawa	Mer Bleue	45.4	-75.7	D	Temperate Forest	Kalmia polifolia	Ericaceae	Tree (evergreen)	Picked from the plant	5.5	898	70			1.3	0.67	0.07	0.03	0.47	0.1
147	Small (1972)	68	Canada	Ontario	Ottawa	Mer Bleue	45.4	-75.7	D	Temperate Forest	Larix laricina	Pinaceae	Conifers	Picked from the plant	5.5	898	70			1.28	0.48	0.08	0.04	0.68	0.48
148	Small (1972)	68	Canada	Ontario	Ottawa	Mer Bleue	45.4	-75.7	D	Temperate Forest	Ledum groenlandicum	Ericaceae	Tree (evergreen)	Picked from the plant	5.5	898	70			1.41	0.4	0.09	0.03	0.64	0.11
149	Small (1972)	68	Canada	Ontario	Ottawa	Mer Bleue	45.4	-75.7	D	Temperate Forest	Nemopanthus mucronata	Aquifoliaceae	Tree (deciduous)	Picked from the plant	5.5	898	70			1.62	0.56	0.1	0.02	1.03	0.1
150	Small (1972)	68	Canada	Ontario	Ottawa	Mer Bleue	45.4	-75.7	D	Temperate Forest	Picea glauca	Pinaceae	Conifers	Picked from the plant	5.5	898	70			1.41	0.38	0.1	0.02	0.83	0.14
151	Small (1972)	68	Canada	Ontario	Ottawa	Mer Bleue	45.4	-75.7	D	Temperate Forest	Picea mariana	Pinaceae	Conifers	Picked from the plant	5.5	898	70			1.02	0.56	0.09	0.05	0.59	0.17
152	Small (1972)	68	Canada	Ontario	Ottawa	Mer Bleue	45.4	-75.7	D	Temperate Forest	Pinus strobus	Pinaceae	Conifers	Picked from the plant	5.5	898	70			1.22	0.5	0.1	0	0.58	0.04
153	Small (1972)	68	Canada	Ontario	Ottawa	Mer Bleue	45.4	-75.7	D	Temperate Forest	Populus tremuloides	Salicaceae	Tree (deciduous)	Picked from the plant	5.5	898	70			1.94	1.34	0.09	0.04	1.13	0.14
154	Small (1972)	68	Canada	Ontario	Ottawa	Mer Bleue	45.4	-75.7	D	Temperate Forest	Rubus hispidus	Rosaceae	Forb	Picked from the plant	5.5	898	70			2.02	1.26	0.12	0.09	1.15	0.17
155	Small (1972)	68	Canada	Ontario	Ottawa	Mer Bleue	45.4	-75.7	D	Temperate Forest	Salix fragilis	Salicaceae	Tree (deciduous)	Picked from the plant	5.5	898	70			2.66	1.44	0.24	0.11	1.09	0.34
156	Small (1972)	68	Canada	Ontario	Ottawa	Mer Bleue	45.4	-75.7	D	Temperate Forest	Sarracenia purpurea	Sarraceniaceae	Forb	Picked from the plant	5.5	898	70			1.09	0.48	0.09	0.02	0.47	0.05
157	Small (1972)	68	Canada	Ontario	Ottawa	Mer Bleue	45.4	-75.7	D	Temperate Forest	Spiraea alba	Rosaceae	Tree (deciduous)	Picked from the plant	5.5	898	70			2.08	1	0.11	0.05	0.72	0.13
158	Small (1972)	68	Canada	Ontario	Ottawa	Mer Bleue	45.4	-75.7	D	Temperate Forest	Spiraea tomentosa	Rosaceae	Tree (deciduous)	Picked from the plant	5.5	898	70			1.86	1.18	0.19	0.09	0.81	0.24
159	Small (1972)	68	Canada	Ontario	Ottawa	Mer Bleue	45.4	-75.7	D	Temperate Forest	Thuja occidentalis	Cupressaceae	Conifers	Picked from the plant	5.5	898	70			1.28	0.62	0.13	0.04	0.58	0.11
160	Small (1972)	68	Canada	Ontario	Ottawa	Mer Bleue	45.4	-75.7	D	Temperate Forest	Ulmus americana	Ulmaceae	Tree (deciduous)	Picked from the plant	5.5	898	70			1.94	1.01	0.14	0.08	0.72	0.13
161	Small (1972)	68	Canada	Ontario	Ottawa	Mer Bleue	45.4	-75.7	D	Temperate Forest	Vaccinium myrtilloides	Ericaceae	Tree (deciduous)	Picked from the plant	5.5	898	70			1.54	0.85	0.07	0.04	0.36	0.1
162	Small (1972)	68	Canada	Ontario	Ottawa	Mer Bleue	45.4	-75.7	D	Temperate Forest	Viburnum cassinoides	Caprifoliaceae	Tree (deciduous)	Picked from the plant	5.5	898	70			2.08	1.02	0.11	0.05	0.73	0.37
104	Smith et al. (1998)	69	Brazil	PA		Curua-Una Forest Reserve	-2	-54	A		Carapa guianensis	Meliaceae	Tree (deciduous)	Litterfall traps cleared every 2 weeks	26	1900	180			1.33	1.09
105	Smith et al. (1998)	69	Brazil	PA		Curua-Una Forest Reserve	-2	-54	A		Euxylophora paraensis	Rutaceae	Tree (evergreen)	Litterfall traps cleared every 2 weeks	26	1900	180			1.45	0.86
106	Smith et al. (1998)	69	Brazil	PA		Curua-Una Forest Reserve	-2	-54	A		Pinus caribaea	Pinaceae	Conifers	Litterfall traps cleared every 2 weeks	26	1900	180			0.9	0.45
107	Smith et al. (1998)	69	Brazil	PA		Curua-Una Forest Reserve	-2	-54	A		All forest		Trees	Litterfall traps cleared every 2 weeks	26	1900	180			1.8	1.4
108	Smith et al. (1998)	69	Brazil	PA		Curua-Una Forest Reserve	-2	-54	A		Leguminosae	N-fixer Leguminosae	Trees	Litterfall traps cleared every 2 weeks	26	1900	180			1.88	1.57
109	Songwe et al. (1997)	70	Cameroon			Bakundu Forest Reserve	4.5	9.2	A		Terminalia superba	Combretaceae	Tree (deciduous)		27	2200	234			2.23	1.24	0.15	0.09	1.25	0.95	1.75	1.81	0.52	0.65
110	Songwe et al. (1997)	70	Cameroon			Bakundu Forest Reserve	4.5	9.2	A		Pycanthus angolensis	Myristicaceae	Tree (evergreen)		27	2200	234			1.64	1.12	0.11	0.09	0.49	0.48	1.54	1.86	1.11	0.98
335	Teklay (2004)	71	Ethiopia	Wondo Genet			7.1	38.6	C		Albizia gummifera, Cordia africana, Milletia ferruginea		Tree (evergreen)	Picked from the plant	19.5	1240	1900			3.32	2.45	0.23	0.12	2.33	3.27
483	Tripathi et al. (2006)	72	Japan	Uryu Experimental Forest	Hokkaido University		44.6	142.3	D		Sasa kurilensis	Gramineae	Graminoid	Recently fallen leaves	4.1	1045	300	40.9	39.7	2.14	1.06
484	Tripathi et al. (2006)	72	Japan	Uryu Experimental Forest	Hokkaido University		44.6	142.3	D		Betula ermanii	Betulaceae	Tree (deciduous)	Recently fallen leaves	4.1	1045	300	47.8	46.7	2.19	1.45
872	Vernescu et al. (2005)	73	Canada	Ontario	Sudburry	site A - Dead Moose	46.5	-80.9	D		Carex stricta	Cyperaceae	Graminoid		5	868	150																	3.9	1.7	56.3
873	Vernescu et al. (2005)	73	Canada	Ontario	Sudburry	site A - Dead Moose	46.5	-80.9	D		Carex rostrata	Cyperaceae	Graminoid		5	863	150																	10.3	6.3	39.2
874	Vernescu et al. (2005)	73	Canada	Ontario	Sudburry	site A - Dead Moose	46.5	-80.9	D		Calamagrostis canadensis	Poaceae	Graminoid		5	868	150																	2.5	2	22.4
875	Vernescu et al. (2005)	73	Canada	Ontario	Sudburry	site A - Dead Moose	46.5	-80.9	D		Glyceria canadensis	Poaceae	Graminoid		5	863	150																	3.9	3.8	1.5
706	Vitousek (1998)	74	USA	HI		Thurston	19.4	-155.2	A		Metrosideros polymorpha	Myrtaceae	Tree (evergreen)	Litterfall traps cleared every 3 weeks	16	2500	1200			0.74	0.36	0.06	0.02							255	203					37.6
707	Vitousek (1998)	74	USA	HI		Laupahoehoe	20	-155.2	A		Metrosideros polymorpha	Myrtaceae	Tree (evergreen)	Litterfall traps cleared every 3 weeks	16	2500	1200			1.17	0.73	0.09	0.05							147	128					40
708	Vitousek (1998)	74	USA	HI		Kokee	22.1	-159.7	A		Metrosideros polymorpha	Myrtaceae	Tree (evergreen)	Litterfall traps cleared every 3 weeks	16	2500	1200			0.94	0.3	0.06	0.02							171	161					31.8
709	Vitousek (1998)	74	USA	HI		Pahoehe	19.6	-156	A		Metrosideros polymorpha	Myrtaceae	Tree (evergreen)	Picked from the plant	16	4400	1200			0.63	0.28	0.05	0.02							257	239					35.2
710	Vitousek (1998)	74	USA	HI			22	-159.4	A		Metrosideros polymorpha	Myrtaceae	Tree (evergreen)	Picked from the plant	16	4400	1200			0.61	0.29	0.05	0.03							247	237					35.4
818	Vitousek & Walker (1989)	75	USA	HI		Hawaii Volcanoes National Park	19.3	-155.3	A		Metrosideros polyrnorpha	Myrtaceae	Tree (evergreen)	Recently fallen leaves	16	2400	1150			0.66	0.56	0.07	0.05							229.4	235
819	Vitousek & Walker (1989)	75	USA	HI		Hawaii Volcanoes National Park	19.3	-155.3	A		Myrica faya	N-fixer Myricaceae	Tree (evergreen)	Recently fallen leaves	16	2400	1150			1.52	1.33	0.03	0.01							137.8	137.3
311	Wang et al. (2003)	76	China	Fujian Province	Fugong		24.6	117.9	C		Kandelia candel	Rhizophoraceae	Tree (evergreen)	Picked from the plant	21.1	1475	0			1.67	0.49	0.16	0.08	0.9	0.72	1.25	2.04	0.45	0.65					308	345	-10.7
312	Wang et al. (2003)	76	China	Fujian Province	Fugong		24.6	117.9	C		Kandelia candel	Rhizophoraceae	Tree (evergreen)	Picked from the plant	21.1	1475	0			1.93	0.55	0.18	0.09	1.05	0.65	1.21	2.18	0.44	0.64					312	299	4.3
313	Wang et al. (2003)	76	China	Fujian Province	Fugong		24.6	117.9	C		Kandelia candel	Rhizophoraceae	Tree (evergreen)	Picked from the plant	21.1	1475	0			2.13	0.56	0.21	0.1	0.96	0.67	1.55	2.03	0.46	0.65					307	272	12.9
314	Wang et al. (2003)	76	China	Fujian Province	Fugong		24.6	117.9	C		Kandelia candel	Rhizophoraceae	Tree (evergreen)	Picked from the plant	21.1	1475	0			1.64	0.55	0.17	0.09	1.22	0.69	1.83	1.93	0.63	0.68					354	251	41
315	Wang et al. (2003)	76	China	Fujian Province	Fugong		24.6	117.9	C		Kandelia candel	Rhizophoraceae	Tree (evergreen)	Picked from the plant	21.1	1475	0			1.49	0.65	0.13	0.08	1.02	0.67	1.88	2	0.61	0.66					351	266	32
316	Wang et al. (2003)	76	China	Fujian Province	Fugong		24.6	117.9	C		Kandelia candel	Rhizophoraceae	Tree (evergreen)	Picked from the plant	21.1	1475	0			1.45	0.56	0.14	0.09	0.93	0.65	1.91	2.16	0.59	0.73					390	307	27
317	Wang et al. (2003)	76	China	Fujian Province	Fugong		24.6	117.9	C		Kandelia candel	Rhizophoraceae	Tree (evergreen)	Picked from the plant	21.1	1475	0			1.35	0.51	0.13	0.08	1.03	0.7	1.95	2.13	0.56	0.7					389	291	33.7
318	Wang et al. (2003)	76	China	Fujian Province	Fugong		24.6	117.9	C		Kandelia candel	Rhizophoraceae	Tree (evergreen)	Picked from the plant	21.1	1475	0			1.31	0.5	0.13	0.08	0.85	0.66	1.69	2.1	0.46	0.69					383	278	37.8
319	Wang et al. (2003)	76	China	Fujian Province	Fugong		24.6	117.9	C		Kandelia candel	Rhizophoraceae	Tree (evergreen)	Picked from the plant	21.1	1475	0			1.42	0.49	0.14	0.06	0.84	0.56	1.38	2.13	0.42	0.71					399	267	49.4
320	Wang et al. (2003)	76	China	Fujian Province	Fugong		24.6	117.9	C		Kandelia candel	Rhizophoraceae	Tree (evergreen)	Picked from the plant	21.1	1475	0			1.35	0.52	0.14	0.08	0.81	0.59	1.5	2.14	0.45	0.69					382	298	28.2
321	Wang et al. (2003)	76	China	Fujian Province	Fugong		24.6	117.9	C		Kandelia candel	Rhizophoraceae	Tree (evergreen)	Picked from the plant	21.1	1475	0			1.58	0.47	0.16	0.07	0.88	0.7	0.99	2.05	0.4	0.73					366	319	14.7
322	Wang et al. (2003)	76	China	Fujian Province	Fugong		24.6	117.9	C		Kandelia candel	Rhizophoraceae	Tree (evergreen)	Picked from the plant	21.1	1475	0			1.56	0.47	0.16	0.06	0.91	0.65	1.33	2.26	0.45	0.75					310	354	-12.4
887	Weerakkody & Parkinson (2006)	77	Sri Lanka	Nuwara Eliya	Hakgala Botanical Garden		6.9	80.8	A	Montane rainforest	Acronychia pedunculata	Rutaceae	Tree (evergreen)	freshly fallen	16	2013	1750	46	45.6	2.3	1.9	0.12	0.08
888	Weerakkody & Parkinson (2006)	77	Sri Lanka	Nuwara Eliya	Hakgala Botanical Garden		6.9	80.8	A	Montane rainforest	Actinodaphnae speciosa	Lauraceae	Tree (evergreen)	freshly fallen	16	2013	1750	54.6	53.9	1.4	1.1	0.06	0.06
889	Weerakkody & Parkinson (2006)	77	Sri Lanka	Nuwara Eliya	Hakgala Botanical Garden		6.9	80.8	A	Montane rainforest	Cestrum aurantiacum	Rutaceae	Tree (evergreen)	freshly fallen	16	2013	1750	42.9	40	3.3	1.6	0.18	0.13
890	Weerakkody & Parkinson (2006)	77	Sri Lanka	Nuwara Eliya	Hakgala Botanical Garden		6.9	80.8	A	Montane rainforest	Meliosma wightii	Sabiaceae	Tree (evergreen)	freshly fallen	16	2013	1750	46.4	49.7	1.6	0.7	0.11	0.03
891	Weerakkody & Parkinson (2006)	77	Sri Lanka	Nuwara Eliya	Hakgala Botanical Garden		6.9	80.8	A	Montane rainforest	Michelia nilagirica	Magnoliaceae	Tree (evergreen)	freshly fallen	16	2013	1750	42	45	2.1	1.8	0.09	0.05
892	Weerakkody & Parkinson (2006)	77	Sri Lanka	Nuwara Eliya	Hakgala Botanical Garden		6.9	80.8	A	Montane rainforest	Semecarpus coriacea	Anacardiaceae	Tree (deciduous)	freshly fallen	16	2013	1750	48	48	1.6	1.6	0.1	0.1
893	Weerakkody & Parkinson (2006)	77	Sri Lanka	Nuwara Eliya	Hakgala Botanical Garden		6.9	80.8	A	Montane rainforest	Symplocos cochinchinencis	Symplocaceae	Tree (evergreen)	freshly fallen	16	2013	1750	40	51.6	1.6	1.2	0.08	0.04
894	Weerakkody & Parkinson (2006)	77	Sri Lanka	Nuwara Eliya	Hakgala Botanical Garden		6.9	80.8	A	Montane rainforest	Symplocos major	Symplocaceae	Tree (evergreen)	freshly fallen	16	2013	1750	43.5	41.6	1.5	1.3	0.05	0.05
185	Yan et al. (2010)	78	China	Zhejiang Province		Tiantong National Forest Park	29.9	121.7	C	Broad-leaved evergreen forest	Castanopsis fargesii	Fagaceae	Tree (evergreen)	Litterfall	16.2	1375	50	43.8	46.2	1.39	0.9	0.07	0.06
186	Yan et al. (2010)	78	China	Zhejiang Province		Tiantong National Forest Park	29.9	121.7	C	Broad-leaved evergreen forest	Tricalysia dubia	Rubiaceae	Tree (evergreen)	Litterfall	16.2	1375	50	44.2	39.7	1.76	0.49	0.09	0.04
187	Yan et al. (2010)	78	China	Zhejiang Province		Tiantong National Forest Park	29.9	121.7	C	Broad-leaved evergreen forest	Litsea elongata	Lauraceae	Tree (evergreen)	Litterfall	16.2	1375	50	48.6	46.4	1.15	0.43	0.07	0.05
188	Yan et al. (2010)	78	China	Zhejiang Province		Tiantong National Forest Park	29.9	121.7	C	Broad-leaved evergreen forest	Camellia fraterna	Theaceae	Tree (evergreen)	Litterfall	16.2	1375	50	41.9	42.4	1.04	0.49	0.05	0.04
189	Yan et al. (2010)	78	China	Zhejiang Province		Tiantong National Forest Park	29.9	121.7	C	Broad-leaved evergreen forest	Cinnamomum japonicum	Lauraceae	Tree (evergreen)	Litterfall	16.2	1375	50	49.1	47.2	1.21	0.5	0.07	0.05
190	Yan et al. (2010)	78	China	Zhejiang Province		Tiantong National Forest Park	29.9	121.7	C	Broad-leaved evergreen forest	Daphniphyllum macropodum	Daphniphylaceae	Tree (evergreen)	Litterfall	16.2	1375	50	41.8	39.2	1.26	0.62	0.06	0.04
191	Yan et al. (2010)	78	China	Zhejiang Province		Tiantong National Forest Park	29.9	121.7	C	Broad-leaved evergreen forest	Meliosma regida	Sabiaceae	Tree (evergreen)	Litterfall	16.2	1375	50	43.2	39.7	0.94	0.49	0.07	0.05
192	Yan et al. (2010)	78	China	Zhejiang Province		Tiantong National Forest Park	29.9	121.7	C	Broad-leaved evergreen forest	Schima superba	Theaceae	Tree (evergreen)	Litterfall	16.2	1375	50	49.7	44.9	0.97	0.77	0.06	0.05
193	Yan et al. (2010)	78	China	Zhejiang Province		Tiantong National Forest Park	29.9	121.7	C	Coniferous evergreen forest	Pinus massoniana	Pinaceae	Conifers	Litterfall	16.2	1375	50	42.4	50.4	1.13	0.54	0.11	0.06
194	Yan et al. (2010)	78	China	Zhejiang Province		Tiantong National Forest Park	29.9	121.7	C	Coniferous evergreen forest	Castanopsis fargesii	Fagaceae	Tree (evergreen)	Litterfall	16.2	1375	50	39.3	45.7	1.25	0.87	0.08	0.07
195	Yan et al. (2010)	78	China	Zhejiang Province		Tiantong National Forest Park	29.9	121.7	C	Coniferous evergreen forest	Cyclobalanopsis gilva	Fagaceae	Tree (evergreen)	Litterfall	16.2	1375	50	35.5	46.6	1.46	1.04	0.09	0.07
196	Yan et al. (2010)	78	China	Zhejiang Province		Tiantong National Forest Park	29.9	121.7	C	Coniferous evergreen forest	Eurya rubiginosa	Theaceae	Tree (evergreen)	Litterfall	16.2	1375	50	36	42.3	1.1	0.72	0.07	0.05
197	Yan et al. (2010)	78	China	Zhejiang Province		Tiantong National Forest Park	29.9	121.7	C	Coniferous evergreen forest	Schima superba	Theaceae	Tree (evergreen)	Litterfall	16.2	1375	50	45.9	46.6	0.91	0.66	0.06	0.05
198	Yan et al. (2010)	78	China	Zhejiang Province		Tiantong National Forest Park	29.9	121.7	C	Coniferous evergreen forest	Loropetalum chinese	Hamamelidaceae	Tree (evergreen)	Litterfall	16.2	1375	50	44.2	40.2	1.16	0.85	0.08	0.07
199	Yan et al. (2010)	78	China	Zhejiang Province		Tiantong National Forest Park	29.9	121.7	C	Deciduous broad-leaved forests	Liquidambar formosana	Altingiaceae	Tree (deciduous)	Litterfall	16.2	1375	50	43.4	37.9	1.85	1.33	0.14	0.1
200	Yan et al. (2010)	78	China	Zhejiang Province		Tiantong National Forest Park	29.9	121.7	C	Deciduous broad-leaved forests	Platycarya strobilacea	Juglandaceae	Tree (deciduous)	Litterfall	16.2	1375	50	43.6	35.5	1.67	1.54	0.18	0.12
201	Yan et al. (2010)	78	China	Zhejiang Province		Tiantong National Forest Park	29.9	121.7	C	Deciduous broad-leaved forests	Quercus fabri	Fagaceae	Tree (deciduous)	Litterfall	16.2	1375	50	43.9	39.6	1.73	1.25	0.17	0.1
202	Yan et al. (2010)	78	China	Zhejiang Province		Tiantong National Forest Park	29.9	121.7	C	Deciduous broad-leaved forests	Phyllanthus glaucus	Euphorbiaceae	Tree (deciduous)	Litterfall	16.2	1375	50	39.5	40.1	2.35	1.41	0.21	0.09
203	Yan et al. (2010)	78	China	Zhejiang Province		Tiantong National Forest Park	29.9	121.7	C	Deciduous broad-leaved forests	Ficus erecta	Moraceae	Tree (deciduous)	Litterfall	16.2	1375	50	36.6	39.2	1.83	1.38	0.13	0.09
204	Yan et al. (2010)	78	China	Zhejiang Province		Tiantong National Forest Park	29.9	121.7	C	Deciduous broad-leaved forests	Indocalamus tessellates	Poaceae	Graminoid	Litterfall	16.2	1375	50	41.4	33.3	1.56	1.32	0.18	0.09
205	Yan et al. (2010)	78	China	Zhejiang Province		Tiantong National Forest Park	29.9	121.7	C	Deciduous broad-leaved forests	Choerospondias axillaris	Anacardiaceae	Tree (deciduous)	Litterfall	16.2	1375	50	36.3	44	1.44	0.79	0.18	0.05
206	Yan et al. (2010)	78	China	Zhejiang Province		Tiantong National Forest Park	29.9	121.7	C	Deciduous broad-leaved forests	Lithocarpus harlandii	Fagaceae	Tree (evergreen)	Litterfall	16.2	1375	50	40	46.9	1.15	0.84	0.14	0.05
207	Yan et al. (2010)	78	China	Zhejiang Province		Tiantong National Forest Park	29.9	121.7	C	Deciduous broad-leaved forests	Illicium lanceolatum	Illiciaceae	Tree (evergreen)	Litterfall	16.2	1375	50	38.5	45.6	0.83	0.76	0.09	0.05
208	Yan et al. (2010)	78	China	Zhejiang Province		Tiantong National Forest Park	29.9	121.7	C	Deciduous broad-leaved forests	Phoebe sheareri	Lauraceae	Tree (evergreen)	Litterfall	16.2	1375	50	39.7	38.7	1.43	0.88	0.1	0.06
209	Yan et al. (2010)	78	China	Zhejiang Province		Tiantong National Forest Park	29.9	121.7	C	Deciduous broad-leaved forests	Litsea elongata	Lauraceae	Tree (evergreen)	Litterfall	16.2	1375	50	37.6	45.9	1.16	0.66	0.08	0.06
895	Yasumura et al. (2005)	79	Japan	Hakkoda Mountains	Aomori Prefecture	Adult tree - Uppermost	40.6	140.9	C		Fagus crenata	Fagaceae	Tree (deciduous)		4.5	1500	800			2.14	0.76									82	62.7
896	Yasumura et al. (2005)	79	Japan	Hakkoda Mountains	Aomori Prefecture	Adult tree - Upper	40.6	140.9	C		Fagus crenata	Fagaceae	Tree (deciduous)		4.5	1500	800			2.28	0.83									54.9	40.3
897	Yasumura et al. (2005)	79	Japan	Hakkoda Mountains	Aomori Prefecture	Adult tree - Middle	40.6	140.9	C		Fagus crenata	Fagaceae	Tree (deciduous)		4.5	1500	800			2.34	0.84									44.1	31.5
898	Yasumura et al. (2005)	79	Japan	Hakkoda Mountains	Aomori Prefecture	Adult tree - Lower	40.6	140.9	C		Fagus crenata	Fagaceae	Tree (deciduous)		4.5	1500	800			2.29	0.9									40.1	33.9
899	Yasumura et al. (2005)	79	Japan	Hakkoda Mountains	Aomori Prefecture	Adult tree - Lowest	40.6	140.9	C		Fagus crenata	Fagaceae	Tree (deciduous)		4.5	1500	800			2.36	0.87									32.8	24
900	Yasumura et al. (2005)	79	Japan	Hakkoda Mountains	Aomori Prefecture	Juvenile tree - Sun	40.6	140.9	C		Fagus crenata	Fagaceae	Tree (deciduous)		4.5	1500	800			2.06	1.23									54.8	53.8
901	Yasumura et al. (2005)	79	Japan	Hakkoda Mountains	Aomori Prefecture	Juvenile tree - Shade	40.6	140.9	C		Fagus crenata	Fagaceae	Tree (deciduous)		4.5	1500	800			2.64	1.26									19.5	17.8
902	Yasumura et al. (2005)	79	Japan	Hakkoda Mountains	Aomori Prefecture	Sun	40.6	140.9	C		Lindera umbellata	Lauraceae	Tree (deciduous)		4.5	1500	800			2.32	0.98									51.4	31.2
903	Yasumura et al. (2005)	79	Japan	Hakkoda Mountains	Aomori Prefecture	Shade	40.6	140.9	C		Lindera umbellata	Lauraceae	Tree (deciduous)		4.5	1500	800			3.11	1.3									21.1	14.6
904	Yasumura et al. (2005)	79	Japan	Hakkoda Mountains	Aomori Prefecture	Sun	40.6	140.9	C		Magnolia salicifolia	Magnoliaceae	Tree (deciduous)		4.5	1500	800			2.32	1.33									48.1	31.5
905	Yasumura et al. (2005)	79	Japan	Hakkoda Mountains	Aomori Prefecture	Shade	40.6	140.9	C		Magnolia salicifolia	Magnoliaceae	Tree (deciduous)		4.5	1500	800			2.73	1.33									22.3	15.8
25	Yuan & Chen (2009ab)	80	Argentina			San Ramon	-41.2	-71.2	C		Austrocedrus chilensis	Cupressaceae	Conifers	Picked from the plant or recently fallen	14	540	115			1.6	1.02
26	Yuan & Chen (2009ab)	80	Argentina			El Bolson	-42	-71.5	C		Austrocedrus chilensis	Cupressaceae	Conifers	Picked from the plant or recently fallen	14	1000	115			1.6	1.02
27	Yuan & Chen (2009ab)	80	Argentina			Los Cipreses	-42.8	-71.4	C		Austrocedrus chilensis	Cupressaceae	Conifers	Picked from the plant or recently fallen	14	1100	115			1.62	1.02
28	Yuan & Chen (2009ab)	80	Argentina			Mascardi	-41.3	-71.5	C		Austrocedrus chilensis	Cupressaceae	Conifers	Picked from the plant or recently fallen	14	1400	115			1.5	1.1
29	Yuan & Chen (2009ab)	80	Argentina	Patagonia	Puerto Madryn		-42.7	-65.4	C		Junellia seriphioides	Verbenaceae	Tree (evergreen)	Picked from the plant or recently fallen	13.7	188	115			1.47	0.88
30	Yuan & Chen (2009ab)	80	Argentina	Andean-Patagonian			-40	-71.5	C		Maytenus boaria	Celastraceae	Tree (evergreen)	Picked from the plant or recently fallen	11	1500	100			1.5	0.5
31	Yuan & Chen (2009ab)	80	Argentina	Andean-Patagonian			-40	-71.5	C		Nothofagus antarctica	Nothofagaceae	Tree (deciduous)	Picked from the plant or recently fallen	11	1500	100			2.2	0.7
32	Yuan & Chen (2009ab)	80	Argentina	Andean-Patagonian			-40	-71.5	C		Nothofagus nervosa	Nothofagaceae	Tree (deciduous)	Picked from the plant or recently fallen	11	1500	100			2.25	0.75
33	Yuan & Chen (2009ab)	80	Argentina	Andean-Patagonian			-40	-71.5	C		Nothofagus obliqua	Nothofagaceae	Tree (deciduous)	Picked from the plant or recently fallen	11	1500	100			2.55	0.8
34	Yuan & Chen (2009ab)	80	Argentina	Andean-Patagonian			-40	-71.5	C		Nothofagus pumilio	Nothofagaceae	Tree (deciduous)	Picked from the plant or recently fallen	11	1500	100			2.4	0.5
59	Yuan & Chen (2009ab)	80	Australia				-36	146	C		Eucalyptus regnans	Myrtaceae	Tree (evergreen)	Picked from the plant or recently fallen	14	500	125			1.19	0.67
60	Yuan & Chen (2009ab)	80	Australia				-36	146	C		Eucalyptus regnans	Myrtaceae	Tree (evergreen)	Picked from the plant or recently fallen	14	500	125			1.33	0.73
61	Yuan & Chen (2009ab)	80	Australia				-36	146	C		Eucalyptus regnans	Myrtaceae	Tree (evergreen)	Picked from the plant or recently fallen	14	500	125			1.41	0.74
62	Yuan & Chen (2009ab)	80	Australia				-36	146	C		Eucalyptus regnans	Myrtaceae	Tree (evergreen)	Picked from the plant or recently fallen	14	500	125			1.46	0.79
63	Yuan & Chen (2009ab)	80	Australia				-36	146	C		Eucalyptus regnans	Myrtaceae	Tree (evergreen)	Picked from the plant or recently fallen	14	500	125			1.59	0.79
64	Yuan & Chen (2009ab)	80	Australia				-36	146	C		Eucalyptus regnans	Myrtaceae	Tree (evergreen)	Picked from the plant or recently fallen	14	500	125			1.66	0.83
65	Yuan & Chen (2009ab)	80	Australia				-36	146	C		Eucalyptus regnans	Myrtaceae	Tree (evergreen)	Picked from the plant or recently fallen	14	500	125			1.64	0.88
95	Yuan & Chen (2009ab)	80	Brazil	AC	Nova California		-10	-67	A		Bactris Gaesipaes	Arecaceae	Tree (evergreen)	Picked from the plant or recently fallen	26	2000	170			2.55	1.31	0.13	0.07			0.51	0.91
96	Yuan & Chen (2009ab)	80	Brazil	AC	Nova California		-10	-67	A		Bertholletia excelsa	Lecythidaceae	Tree (evergreen)	Picked from the plant or recently fallen	26	2000	170			2.05	1.46	0.1	0.05			1.16	1.34
97	Yuan & Chen (2009ab)	80	Brazil	AC	Nova California		-10	-67	A		Theobroma grandiflorum	Malvaceae	Tree (evergreen)	Picked from the plant or recently fallen	26	2000	170			1.7	1.19	0.09	0.04			0.65	1.23
111	Yuan & Chen (2009ab)	80	Cameroon			Korup National Park	5.3	9	A		Klaineanthus gaboniae	Euphorbiaceae	Tree (evergreen)	Picked from the plant or recently fallen	26	5460	50			2.35	1.62
131	Yuan & Chen (2009ab)	80	Canada	Ontario			46.7	-83.7	D		Picea glauca	Pinaceae	Conifers	Picked from the plant or recently fallen	4.5	868	150			1.38	0.85	0.13	0.06	0.71	0.25	0.66	1.17	0.1	0.07
132	Yuan & Chen (2009ab)	80	Canada	Ontario			46.5	-81.3	D		Picea mariana	Pinaceae	Conifers	Picked from the plant or recently fallen	8.8	863	150			1.24	0.7	0.14	0.04	0.67	0.11	0.43	0.84	0.09	0.05
133	Yuan & Chen (2009ab)	80	Canada	Ontario			45.3	-78.2	D		Picea rubens	Pinaceae	Conifers	Picked from the plant or recently fallen	5.4	1000	150			1.32	0.56	0.13	0.03	0.82	0.09	0.38	0.73	0.08	0.06
134	Yuan & Chen (2009ab)	80	Canada				65.8	-111.9	E		Populus tremuloides	Salicaceae	Tree (deciduous)	Picked from the plant or recently fallen	2.6	483	150			2.01	1.11
298	Yuan & Chen (2009ab)	80	China	Mengsong	Xishuangbanna	Yunnan	21.5	100.4	C		Akebia trifoliata	Lardizabalaceae	Tree (deciduous)	Picked from the plant or recently fallen	20.5	1379	1500			1.81	1.12
299	Yuan & Chen (2009ab)	80	China	Mengsong	Xishuangbanna	Yunnan	21.5	100.4	C		Alseodaphne petiolaris	Lauraceae	Tree (evergreen)	Picked from the plant or recently fallen	20.5	1379	1500			1.78	0.74
300	Yuan & Chen (2009ab)	80	China	Mengsong	Xishuangbanna	Yunnan	21.5	100.4	C		Hovenia acerba	Rhamnaceae	Tree (deciduous)	Picked from the plant or recently fallen	20.5	1379	1500			3.72	1.62
301	Yuan & Chen (2009ab)	80	China	Mengsong	Xishuangbanna	Yunnan	21.5	100.4	C		Melodinus henryi	Apocynaceae	Tree (evergreen) Liana	Picked from the plant or recently fallen	20.5	1379	1500			2.97	1.24
302	Yuan & Chen (2009ab)	80	China	Mengsong	Xishuangbanna	Yunnan	21.5	100.4	C		Melodinus suaveolens	Apocynaceae	Tree (evergreen) Liana	Picked from the plant or recently fallen	20.5	1379	1500			3.81	1.88
303	Yuan & Chen (2009ab)	80	China	Mengsong	Xishuangbanna	Yunnan	21.5	100.4	C		Michelia floribunda	Magnoliaceae	Tree (evergreen)	Picked from the plant or recently fallen	20.5	1379	1500			2	0.83
304	Yuan & Chen (2009ab)	80	China	Mongolia	Duolun	Shifting sandland	42.5	116.7	D		Salix gordejevii	Salicaceae	Tree (deciduous)	Picked from the plant or recently fallen	3.3	401	1200			0.71	0.32
305	Yuan & Chen (2009ab)	80	China	Mongolia	Duolun	Fixed sandland	42.5	116.7	D		Salix gordejevii	Salicaceae	Tree (deciduous)	Picked from the plant or recently fallen	3.3	401	1200			0.85	0.46
306	Yuan & Chen (2009ab)	80	China	Mongolia	Duolun	Lowland	42.5	116.7	D		Salix gordejevii	Salicaceae	Tree (deciduous)	Picked from the plant or recently fallen	3.3	401	1200			1.07	0.61
307	Yuan & Chen (2009ab)	80	China	Xishuangbanna			21.1	101.4	C		Schima superba	Theaceae	Tree (evergreen)	Picked from the plant or recently fallen	22.9	1500	1500			2.35	1.33
308	Yuan & Chen (2009ab)	80	China	Mengsong	Xishuangbanna	Yunnan	21.5	100.4	C		Smilax corbularia	Smilacaceae	Tree (evergreen) Liana	Picked from the plant or recently fallen	20.5	1379	1500			2.11	1.02
309	Yuan & Chen (2009ab)	80	China	Mengsong	Xishuangbanna	Yunnan	21.5	100.4	C		Smilax hypoglauca	Smilacaceae	Tree (evergreen) Liana	Picked from the plant or recently fallen	20.5	1379	1500			1.96	1.16
310	Yuan & Chen (2009ab)	80	China	Mengsong	Xishuangbanna	Yunnan	21.5	100.4	C		Smilax microphylla	Smilacaceae	Tree (evergreen) Liana	Picked from the plant or recently fallen	20.5	1379	1500			2.63	1.62
334	Yuan & Chen (2009ab)	80	Estonia				58.5	28	D		Pinus sylvestris	Pinaceae	Conifers	Picked from the plant or recently fallen	5	600	0			0.8	0.32
366	Yuan & Chen (2009ab)	80	France	Marseille	La Roque d'Antheron Povince		43.7	5.3	C		Pinus halepensis	Pinaceae	Conifers	Picked from the plant or recently fallen	8	750	500			1.11	0.52	0.08	0.02
367	Yuan & Chen (2009ab)	80	France	massif forestier des Aiguillettes	les Monts du Beaujolais		46.5	4.6	C		Pseudotsuga menziesii	Pinaceae	Conifers	Picked from the plant or recently fallen	7	1000	400			1.92	1.06
368	Yuan & Chen (2009ab)	80	France	massif forestier des Aiguillettes	les Monts du Beaujolais		46.5	4.6	C		Pseudotsuga menziesii	Pinaceae	Conifers	Picked from the plant or recently fallen	7	1000	400			1.93	1.08
369	Yuan & Chen (2009ab)	80	France	massif forestier des Aiguillettes	les Monts du Beaujolais		46.5	4.6	C		Pseudotsuga menziesii	Pinaceae	Conifers	Picked from the plant or recently fallen	7	1000	400			2.68	1.45
466	Yuan & Chen (2009ab)	80	Italy				41.1	14.6	C		Fagus sylvatica	Fagaceae	Tree (deciduous)	Picked from the plant or recently fallen	7.9	2166	700			2.71	1.68	0.18	0.1
467	Yuan & Chen (2009ab)	80	Italy	Province of Belluno			46.4	11.8	D		Vaccinium myrtillus	Ericaceae	Tree (deciduous)	Picked from the plant or recently fallen	5	1200	1000			3.28	1.28
468	Yuan & Chen (2009ab)	80	Italy	Province of Belluno			46.4	11.8	D		Vaccinium vitis-idaea	Ericaceae	Tree (evergreen)	Picked from the plant or recently fallen	5	1200	1000			2.25	0.99
474	Yuan & Chen (2009ab)	80	Japan	Okinawa Island			26.8	128.2	C		Castanopsis sieboldii	Fagaceae	Tree (evergreen)	Picked from the plant or recently fallen	22.3	2827	0			1.23	1.06
475	Yuan & Chen (2009ab)	80	Japan	Hakkoda Mountains			40.6	140.9	C		Fagus crenata	Fagaceae	Tree (deciduous)	Picked from the plant or recently fallen	4.6	1650	700			2.28	0.85
476	Yuan & Chen (2009ab)	80	Japan	Hakkoda Mountains	Aomori		40.6	140.9	C		Fagus crenata	Fagaceae	Tree (deciduous)	Picked from the plant or recently fallen	4.8	1300	700			2.28	0.83
477	Yuan & Chen (2009ab)	80	Japan	Hakkoda Mountains			40.6	140.9	C		Lindera umbellata	Lauraceae	Tree (deciduous)	Picked from the plant or recently fallen	4.6	1650	700			3.48	1.7
478	Yuan & Chen (2009ab)	80	Japan	Hakkoda Mountains	Aomori		40.6	140.9	C		Lindera umbellata	Lauraceae	Tree (deciduous)	Picked from the plant or recently fallen	4.8	1300	700			2.32	0.98
479	Yuan & Chen (2009ab)	80	Japan	Hakkoda Mountains			40.6	140.9	C		Magnolia salicifolia	Magnoliaceae	Tree (deciduous)	Picked from the plant or recently fallen	4.6	1650	700			3.24	1.39
480	Yuan & Chen (2009ab)	80	Japan	Hakkoda Mountains	Aomori		40.6	140.9	C		Magnolia salicifolia	Magnoliaceae	Tree (deciduous)	Picked from the plant or recently fallen	4.8	1300	700			2.32	1.33
481	Yuan & Chen (2009ab)	80	Japan	Mt Mikasa	Nata		34.7	135.9	C		Neolitsea aciculata	Lauraceae	Tree (evergreen)	Picked from the plant or recently fallen	14.4	1355	700			1.7	1.1
482	Yuan & Chen (2009ab)	80	Japan	Okinawa Island			26.8	128.2	C		Schima wallichii	Theaceae	Tree (evergreen)	Picked from the plant or recently fallen	22.3	2827	0			1.33	1.16
499	Yuan & Chen (2009ab)	80	Mexico	Jalisco		Estacion de Biologia Chamela	19.5	-105	A		Cordia alliodora	Boraginaceae	Tree (deciduous)	Picked from the plant or recently fallen	24.9	798	500			1.69	0.98
500	Yuan & Chen (2009ab)	80	Mexico	Jalisco		Estacion de Biologia Chamela	19.5	-105	A		Guapira macrocarpa	Nyctaginaceae	Tree (deciduous)	Picked from the plant or recently fallen	24.9	798	500			2.15	1.21
533	Yuan & Chen (2009ab)	80	USA	Alaska		Lake Minchumina	63.9	-152.3	D		Betula papyrifera	Betulaceae	Tree (deciduous)	Picked from the plant or recently fallen	2.6	483	200			2.2	0.7
537	Yuan & Chen (2009ab)	80	South Africa				-33.9	23	C		Pinus elliotii	Pinaceae	Conifers	Picked from the plant or recently fallen	14	1113				1.05	0.7
572	Yuan & Chen (2009ab)	80	Spain				37.2	-2.6	C		Cistus laurifolius	Cistaceae	Tree (evergreen)	Picked from the plant or recently fallen	11	700	1500			1.37	0.4
573	Yuan & Chen (2009ab)	80	Spain	Sierra de la Demanda mountains			42.3	-4.2	C		Pinus sylvestris	Pinaceae	Conifers	Picked from the plant or recently fallen	12.4	895	790			1.25	0.8
574	Yuan & Chen (2009ab)	80	Spain	University of Vigo			42.2	-8.7	C		Quercus robur	Fagaceae	Tree (deciduous)	Picked from the plant or recently fallen	15	1800	435			2.15	1.55
577	Yuan & Chen (2009ab)	80	Sweden				68.4	18.2	D		Betula nana	Betulaceae	Tree (deciduous)	Picked from the plant or recently fallen	-0.5	320	500			1.69	0.6
578	Yuan & Chen (2009ab)	80	Sweden				60.8	16.3	D		Betula pubescens	Betulaceae	Tree (deciduous)	Picked from the plant or recently fallen	3.8	720	64			1.74	0.77	0.18	0.11
579	Yuan & Chen (2009ab)	80	Sweden				60.8	16.5	D		Betula pubescens	Betulaceae	Tree (deciduous)	Picked from the plant or recently fallen	3.8	720	64			3.07	0.77	0.14	0.11
580	Yuan & Chen (2009ab)	80	Sweden				60.9	16.1	D		Picea abies	Pinaceae	Conifers	Picked from the plant or recently fallen	3.4	775	64			0.85	0.42
581	Yuan & Chen (2009ab)	80	Sweden				60.8	16.5	D		Pinus contorta	Pinaceae	Conifers	Picked from the plant or recently fallen	3.8	720	64			1.05	0.39
582	Yuan & Chen (2009ab)	80	Sweden				60.8	16.5	D		Pinus contorta	Pinaceae	Conifers	Picked from the plant or recently fallen	2.4	720	64			1.05	0.39
583	Yuan & Chen (2009ab)	80	Sweden				60.8	16.5	D		Pinus contorta	Pinaceae	Conifers	Picked from the plant or recently fallen	3.8	609	64			1.05	0.39
584	Yuan & Chen (2009ab)	80	Sweden				60.5	13.4	D		Pinus sylvestris	Pinaceae	Conifers	Picked from the plant or recently fallen	2.4	710	64			1.51	0.48
585	Yuan & Chen (2009ab)	80	Sweden				60.8	16.5	D		Pinus sylvestris	Pinaceae	Conifers	Picked from the plant or recently fallen	3.8	609	64			1.51	0.48
586	Yuan & Chen (2009ab)	80	Sweden		Umea		64.4	19.8	D		Pinus sylvestris	Pinaceae	Conifers	Picked from the plant or recently fallen	1.2	595	103			0.99	0.5
587	Yuan & Chen (2009ab)	80	Sweden				68.4	18.2	D		Vaccinium uliginosum	Ericaceae	Tree (deciduous)	Picked from the plant or recently fallen	-0.5	320	500			2.08	0.8
741	Yuan & Chen (2009ab)	80	USA	NC			36	-79.8	C		Acer rubrum	Sapindaceae	Tree (deciduous)	Picked from the plant or recently fallen	15.5	1140	123			1.57	0.74
742	Yuan & Chen (2009ab)	80	USA	MA	Petersham		42.5	-72.2	D		Acer rubrum	Sapindaceae	Tree (deciduous)	Picked from the plant or recently fallen	9.3	1088	330			1.65	0.61
743	Yuan & Chen (2009ab)	80	USA	MA	Petersham		42.5	-72.2	D		Acer saccharum	Sapindaceae	Tree (deciduous)	Picked from the plant or recently fallen	9.3	1088	330			1.94	0.85	0.26	0.19
744	Yuan & Chen (2009ab)	80	USA	NY		Catskill Mountains	42.1	-74.3	D		Acer saccharum	Sapindaceae	Tree (deciduous)	Picked from the plant or recently fallen	4.3	1530	700			2.1	0.8
745	Yuan & Chen (2009ab)	80	USA	VA	Parsons	Fernow Experimental Forest	39.1	-79.7	C		Acer saccharum	Sapindaceae	Tree (deciduous)	Picked from the plant or recently fallen	8.4	1158	500			2.35	0.54
746	Yuan & Chen (2009ab)	80	USA	MN	Minneapolis		45.2	-93.2	D		Acer saccharum	Sapindaceae	Tree (deciduous)	Picked from the plant or recently fallen	6	660	270			1.82	0.45	0.22	0.17
747	Yuan & Chen (2009ab)	80	USA	MA	Petersham		42.5	-72.2	D		Betula alleghaniensis	Betulaceae	Tree (deciduous)	Picked from the plant or recently fallen	9.3	1088	330			2.02	0.9	0.39	0.22
748	Yuan & Chen (2009ab)	80	USA	NY		Catskill Mountains	42.1	-74.3	D		Betula alleghaniensis	Betulaceae	Tree (deciduous)	Picked from the plant or recently fallen	4.3	1530	700			2.4	1.25
749	Yuan & Chen (2009ab)	80	USA	MA	Petersham		42.5	-72.2	D		Betula populifolia	Betulaceae	Tree (deciduous)	Picked from the plant or recently fallen	9.3	1088	330			2.34	1.12	0.24	0.17
750	Yuan & Chen (2009ab)	80	USA	NM	Chihuahuan		32.5	-106.8	B		Brickellia laciniata	Asteraceae	Tree (deciduous)	Picked from the plant or recently fallen	14.4	272	1000			2.3	0.81	0.21	0.1
751	Yuan & Chen (2009ab)	80	USA	MA	Petersham		42.5	-72.2	D		Castanea dentata	Fagaceae	Tree (deciduous)	Picked from the plant or recently fallen	9.3	1088	330			1.95	0.79
752	Yuan & Chen (2009ab)	80	USA	NM	Chihuahuan		32.5	-106.8	B		Chilopsis linearis	Bignoniaceae	Tree (deciduous)	Picked from the plant or recently fallen	14.4	272	1000			2.1	0.74	0.18	0.07
753	Yuan & Chen (2009ab)	80	USA	MA	Petersham		42.5	-72.2	D		Cornus alternifolia	Cornaceae	Tree (deciduous)	Picked from the plant or recently fallen	9.3	1088	330			1.52	0.65	0.23	0.12
754	Yuan & Chen (2009ab)	80	USA	MA	Petersham		42.5	-72.2	D		Fagus grandifolia	Fagaceae	Tree (deciduous)	Picked from the plant or recently fallen	9.3	1088	330			2.3	0.95	0.16	0.11
755	Yuan & Chen (2009ab)	80	USA	NY		Catskill Mountains	42.1	-74.3	D		Fagus grandifolia	Fagaceae	Tree (deciduous)	Picked from the plant or recently fallen	4.3	1530	700			2.3	1
756	Yuan & Chen (2009ab)	80	USA	NM	Chihuahuan		32.5	-106.8	B		Fallugia paradoxa	Rosaceae	Tree (evergreen)	Picked from the plant or recently fallen	14.4	272	1000			1.7	1.31	0.2	0.15
757	Yuan & Chen (2009ab)	80	USA	NM	Chihuahuan		32.5	-106.8	B		Flourensia cernua	Asteraceae	Tree (deciduous)	Picked from the plant or recently fallen	14.4	272	1000			2.7	1.22	0.26	0.13
758	Yuan & Chen (2009ab)	80	USA	MA	Petersham		42.5	-72.2	D		Fraxinus americana	Oleaceae	Tree (deciduous)	Picked from the plant or recently fallen	9.3	1088	330			2.25	1.1	0.28	0.17
759	Yuan & Chen (2009ab)	80	USA	MA	Petersham		42.5	-72.2	D		Hamamelis virginiana	Rubiaceae	Tree (deciduous)	Picked from the plant or recently fallen	9.3	1088	330			1.39	0.61
760	Yuan & Chen (2009ab)	80	USA	MA	Petersham		42.5	-72.2	D		Ilex verticillata	Aquifoliaceae	Tree (deciduous)	Picked from the plant or recently fallen	9.3	1088	330			2.09	1.55
761	Yuan & Chen (2009ab)	80	USA	FL	Tampa Bay		27.5	-82.4	C		Laguncularia racemosa	Combretaceae	Tree (evergreen)	Picked from the plant or recently fallen	18	2236	0			0.75	0.6
762	Yuan & Chen (2009ab)	80	USA	FL	Tampa Bay		27.5	-82.4	C		Laguncularia racemosa	Combretaceae	Tree (evergreen)	Picked from the plant or recently fallen	18	2236	0			1	0.65
763	Yuan & Chen (2009ab)	80	USA	FL	Tampa Bay		27.5	-82.4	C		Laguncularia racemosa	Combretaceae	Tree (evergreen)	Picked from the plant or recently fallen	18	2236	0			1.25	0.7
764	Yuan & Chen (2009ab)	80	USA	VA	Parsons	Fernow Experimental Forest	39.1	-79.7	C		Liriodendron tulipifera	Magnoliaceae	Tree (deciduous)	Picked from the plant or recently fallen	8.4	1158	500			2.92	0.7
765	Yuan & Chen (2009ab)	80	USA	HI			19.7	-155.8	A		Metrosideros polymorpha	Myrtaceae	Tree (evergreen)	Picked from the plant or recently fallen	20	500	150			1.72	0.94
766	Yuan & Chen (2009ab)	80	USA	HI			19.6	-155.8	A		Metrosideros polymorpha	Myrtaceae	Tree (evergreen)	Picked from the plant or recently fallen	20	900	150			1.55	0.7
767	Yuan & Chen (2009ab)	80	USA	HI			19.1	-155.8	A		Metrosideros polymorpha	Myrtaceae	Tree (evergreen)	Picked from the plant or recently fallen	20	1500	150			1.08	0.68
768	Yuan & Chen (2009ab)	80	USA	HI			19.3	-155.8	A		Metrosideros polymorpha	Myrtaceae	Tree (evergreen)	Picked from the plant or recently fallen	20	2000	150			2.82	1.88
769	Yuan & Chen (2009ab)	80	USA	HI			19.4	-155.8	A		Metrosideros polymorpha	Myrtaceae	Tree (evergreen)	Picked from the plant or recently fallen	20	5500	150			2.48	1.93
770	Yuan & Chen (2009ab)	80	USA	HI			19.7	-155.1	A		Miconia calvescens	Melastomataceae	Tree (evergreen)	Picked from the plant or recently fallen	23	2500	150			2.27	1.02
771	Yuan & Chen (2009ab)	80	USA	NC			36	-79.8	C		Pinus taeda	Pinaceae	Conifers	Picked from the plant or recently fallen	15.5	1140	120			1.14	0.49
772	Yuan & Chen (2009ab)	80	USA	MA	Petersham		42.5	-72.2	D		Populus grandidentata	Salicaceae	Tree (deciduous)	Picked from the plant or recently fallen	9.3	1088	330			2.19	0.94
773	Yuan & Chen (2009ab)	80	USA	UT	Farmington	Wasatch Mountains	41	-111.9	D		Populus tremuloides	Salicaceae	Tree (deciduous)	Picked from the plant or recently fallen	2.6	1140	1300			2.36	0.44	0.17	0.05	1.03	0.43	1.21	1.86	0.25	0.1
774	Yuan & Chen (2009ab)	80	USA	MA	Petersham		42.5	-72.2	D		Populus tremuloides	Salicaceae	Tree (deciduous)	Picked from the plant or recently fallen	9.3	1088	330			2.15	1.16	0.2	0.12
775	Yuan & Chen (2009ab)	80	USA	MA	Petersham		42.5	-72.2	D		Prunus serotina	Rosaceae	Tree (deciduous)	Picked from the plant or recently fallen	9.3	1088	330			1.89	0.74	0.41	0.27
776	Yuan & Chen (2009ab)	80	USA	VA	Parsons	Fernow Experimental Forest	39.1	-79.7	C		Prunus serotina	Rosaceae	Tree (deciduous)	Picked from the plant or recently fallen	8.4	1158	500			3.13	0.72
777	Yuan & Chen (2009ab)	80	USA	MN	Minneapolis		45.2	-93.2	D		Quercus ellipsoidalis	Fagaceae	Tree (deciduous)	Picked from the plant or recently fallen	6	660	270			2.53	0.99
778	Yuan & Chen (2009ab)	80	USA	MA	Petersham		42.5	-72.2	D		Quercus rubra	Fagaceae	Tree (deciduous)	Picked from the plant or recently fallen	9.3	1088	330			2.32	0.83
779	Yuan & Chen (2009ab)	80	USA	NY		Catskill Mountains	42.1	-74.3	D		Quercus rubra	Fagaceae	Tree (deciduous)	Picked from the plant or recently fallen	4.3	1530	700			2.4	1
780	Yuan & Chen (2009ab)	80	USA	NM	Chihuahuan		32.5	-106.8	B		Rhus microphylla	Anacardiaceae	Tree (deciduous)	Picked from the plant or recently fallen	14.4	272	1000			2.3	1.04	0.17	0.08
781	Yuan & Chen (2009ab)	80	USA	NY		Catskill Mountains	42.1	-74.3	D		Tsuga canadensis	Pinaceae	Conifers	Picked from the plant or recently fallen	4.3	1530	700			1.3	0.8
782	Yuan & Chen (2009ab)	80	USA	MA	Petersham		42.5	-72.2	D		Vaccinium corymbosum	Ericaceae	Tree (deciduous)	Picked from the plant or recently fallen	9.3	1088	330			1.52	0.69
783	Yuan & Chen (2009ab)	80	USA	MA	Petersham		42.5	-72.2	D		Viburnum alnifolium	Caprifoliaceae	Tree (deciduous)	Picked from the plant or recently fallen	9.3	1088	330			1.73	0.81
784	Yuan & Chen (2009ab)	80	USA	MA	Petersham		42.5	-72.2	D		Viburnum cassinoides	Caprifoliaceae	Tree (deciduous)	Picked from the plant or recently fallen	9.3	1088	330			1.1	0.49
123	Yuan & Chen (2010)	81	Canada	Ontario	Thunder Bay	7 years	49.5	-89.7	D	Boreal forest	Populus tremuloides	Salicaceae	Tree (deciduous)	Recently fallen leaves	2.6	710	183			2	0.64									77.2	60.5
124	Yuan & Chen (2010)	81	Canada	Ontario	Thunder Bay	25 years	49.5	-89.7	D	Boreal forest	Populus tremuloides	Salicaceae	Tree (deciduous)	Recently fallen leaves	2.6	710	183			2.3	0.78									87.9	71.3
125	Yuan & Chen (2010)	81	Canada	Ontario	Thunder Bay	85 years	49.5	-89.7	D	Boreal forest	Populus tremuloides	Salicaceae	Tree (deciduous)	Recently fallen leaves	2.6	710	183			2.4	0.9									94.4	71.3
126	Yuan & Chen (2010)	81	Canada	Ontario	Thunder Bay	139 years	49.5	-89.7	D	Boreal forest	Populus tremuloides	Salicaceae	Tree (deciduous)	Recently fallen leaves	2.6	710	183			2.6	1.07									99.8	78.8
237	Yuan et al. (2005)	82	China	Duolun County			42.5	116.7	B	Steppe	Betula platyphylla	Betulaceae	Tree (deciduous)	Picked from the plant	1.6	385	1200			2.28	1.21
238	Yuan et al. (2005)	82	China	Duolun County			42.5	116.7	B	Steppe	Ulmus macrocarpa	Ulmaceae	Tree (deciduous)	Picked from the plant	1.6	385	1200			2.65	1.03
239	Yuan et al. (2005)	82	China	Duolun County			42.5	116.7	B	Steppe	Prunus armeniaca	Rosaceae	Tree (deciduous)	Picked from the plant	1.6	385	1200			2.21	1.26
240	Yuan et al. (2005)	82	China	Duolun County			42.5	116.7	B	Steppe	Prunus padus	Rosaceae	Tree (deciduous)	Picked from the plant	1.6	385	1200			1.95	1.03
241	Yuan et al. (2005)	82	China	Duolun County			42.5	116.7	B	Steppe	Malus baccata	Rosaceae	Tree (deciduous)	Picked from the plant	1.6	385	1200			2.09	1.23
242	Yuan et al. (2005)	82	China	Duolun County			42.5	116.7	B	Steppe	Salix flavida	Salicaceae	Tree (deciduous)	Picked from the plant	1.6	385	1200			2.65	1.08
243	Yuan et al. (2005)	82	China	Duolun County			42.5	116.7	B	Steppe	Salix microstachya	Salicaceae	Tree (deciduous)	Picked from the plant	1.6	385	1200			2.77	1.53
244	Yuan et al. (2005)	82	China	Duolun County			42.5	116.7	B	Steppe	Rosa xanthina	Rosaceae	Tree (deciduous)	Picked from the plant	1.6	385	1200			2.52	1.12
245	Yuan et al. (2005)	82	China	Duolun County			42.5	116.7	B	Steppe	Leymus chinensis	Poaceae	Graminoid	Picked from the plant	1.6	385	1200			2.16	1.15
246	Yuan et al. (2005)	82	China	Duolun County			42.5	116.7	B	Steppe	Stipa grandis	Poaceae	Graminoid	Picked from the plant	1.6	385	1200			1.96	0.99
247	Yuan et al. (2005)	82	China	Duolun County			42.5	116.7	B	Steppe	Stipa grandis	Poaceae	Graminoid	Picked from the plant	1.6	385	1200			1.84	1.07
248	Yuan et al. (2005)	82	China	Duolun County			42.5	116.7	B	Steppe	Agropyron cristatum	Poaceae	Graminoid	Picked from the plant	1.6	385	1200			1.68	1.04
249	Yuan et al. (2005)	82	China	Duolun County			42.5	116.7	B	Steppe	Carex korshinsky	Cyperaceae	Graminoid	Picked from the plant	1.6	385	1200			2.08	1.29
250	Yuan et al. (2005)	82	China	Duolun County			42.5	116.7	B	Steppe	Calamagrostis epigejos	Poaceae	Graminoid	Picked from the plant	1.6	385	1200			1.58	0.96
251	Yuan et al. (2005)	82	China	Duolun County			42.5	116.7	B	Steppe	Sanguisorba officinalis	Rosaceae	Forb	Picked from the plant	1.6	385	1200			2.92	0.82
252	Yuan et al. (2005)	82	China	Duolun County			42.5	116.7	B	Steppe	Sanguisorba officinalis	Rosaceae	Forb	Picked from the plant	1.6	385	1200			3.05	0.91
253	Yuan et al. (2005)	82	China	Duolun County			42.5	116.7	B	Steppe	Polygonum divaricatum	Polygonaceae	Forb	Picked from the plant	1.6	385	1200			3.44	0.82
254	Yuan et al. (2005)	82	China	Duolun County			42.5	116.7	B	Steppe	Potentilla tanacetifolia	Rosaceae	Forb	Picked from the plant	1.6	385	1200			3.06	0.8
255	Yuan et al. (2005)	82	China	Duolun County			42.5	116.7	B	Steppe	Artemisia frigida	Compositae	Forb	Picked from the plant	1.6	385	1200			2.11	1.18
256	Yuan et al. (2005)	82	China	Duolun County			42.5	116.7	B	Steppe	Artemisia sieversiana	Compositae	Forb	Picked from the plant	1.6	385	1200			3.01	1.5
257	Yuan et al. (2005)	82	China	Duolun County			42.5	116.7	B	Steppe	Artemisia scoparia	Compositae	Forb	Picked from the plant	1.6	385	1200			2.15	1.29
258	Yuan et al. (2005)	82	China	Duolun County			42.5	116.7	B	Steppe	Chenopodium album	Amaranthaceae	Forb	Picked from the plant	1.6	385	1200			3.79	1.91
259	Yuan et al. (2005)	82	China	Duolun County			42.5	116.7	B	Steppe	Thalictrum squarrosum	Ranunculaceae	Forb	Picked from the plant	1.6	385	1200			1.77	0.99
260	Yuan et al. (2005)	82	China	Duolun County			42.5	116.7	B	Steppe	Linum perenne	Linaceae	Forb	Picked from the plant	1.6	385	1200			3.19	1.74
261	Yuan et al. (2005)	82	China	Duolun County			42.5	116.7	B	Steppe	Helianthus annuus	Asteraceae	Forb	Picked from the plant	1.6	385	1200			3.16	1.87
262	Yuan et al. (2005)	82	China	Duolun County			42.5	116.7	B	Steppe	Lespedeza bicolor	N-fixer Fabaceae	Tree (deciduous)	Picked from the plant	1.6	385	1200			2.15	1.49
263	Yuan et al. (2005)	82	China	Duolun County			42.5	116.7	B	Steppe	Lespedeza bicolor	N-fixer Fabaceae	Tree (deciduous)	Picked from the plant	1.6	385	1200			2.83	1.94
264	Yuan et al. (2005)	82	China	Duolun County			42.5	116.7	B	Steppe	Hedysarum laeve	N-fixer Fabaceae	Forb	Picked from the plant	1.6	385	1200			2.66	1.02
265	Yuan et al. (2005)	82	China	Duolun County			42.5	116.7	B	Steppe	Vicia crocca	N-fixer Fabaceae	Forb	Picked from the plant	1.6	385	1200			2.53	1.5
266	Yuan et al. (2005)	82	China	Duolun County			42.5	116.7	B	Steppe	Vicia crocca	N-fixer Fabaceae	Forb	Picked from the plant	1.6	385	1200			2.76	1.84
267	Yuan et al. (2005)	82	China	Duolun County			42.5	116.7	B	Steppe	Thermopsis lanceolata	N-fixer Fabaceae	Forb	Picked from the plant	1.6	385	1200			3.5	1.57
268	Yuan et al. (2005)	82	China	Duolun County			42.5	116.7	B	Steppe	Medicago ruthenica	N-fixer Fabaceae	Forb	Picked from the plant	1.6	385	1200			2.93	2.06
504	Zotz (2004)	83	Panama	Barro Colorado Island			9.2	-79.9	A	Moist tropical lowland forest	Anthurium brownii	Araceae	Forb	Picked from the plant	27	2600	140			1.23	0.84	0.13	0.05	2.35	1.84	1.77	3.69	0.37	0.64
505	Zotz (2004)	83	Panama	Barro Colorado Island			9.2	-79.9	A	Moist tropical lowland forest	Anthurium clavigerum	Araceae	Forb	Picked from the plant	27	2600	140			3.07	2.09	0.14	0.06	1.89	1.25	2.46	3.17	0.75	0.76
506	Zotz (2004)	83	Panama	Barro Colorado Island			9.2	-79.9	A	Moist tropical lowland forest	Anthurium friedrichsthalii	Araceae	Forb	Picked from the plant	27	2600	140			1.3	0.77	0.13	0.06	3.2	2.53	3.94	4.14	0.75	0.76
507	Zotz (2004)	83	Panama	Barro Colorado Island			9.2	-79.9	A	Moist tropical lowland forest	Anthurium scandens	Araceae	Forb	Picked from the plant	27	2600	140			0.75	0.55	0.05	0.03	1.51	0.53	2.18	1.9	0.94	0.75
508	Zotz (2004)	83	Panama	Barro Colorado Island			9.2	-79.9	A	Moist tropical lowland forest	Clusia uvitana	Clusiaceae	Tree (evergreen)	Picked from the plant	27	2600	140			0.76	0.67	0.04	0.03	1.17	1.07	3.92	3.47	0.58	0.52
509	Zotz (2004)	83	Panama	Barro Colorado Island			9.2	-79.9	A	Moist tropical lowland forest	Aspasia principissa	Orchidaceae	Forb	Picked from the plant	27	2600	140			1.46	0.84	0.07	0.03	2.07	1.93	1.9	2.01	0.11	0.07
510	Zotz (2004)	83	Panama	Barro Colorado Island			9.2	-79.9	A	Moist tropical lowland forest	Catasetum viridiflavum	Orchidaceae	Forb	Picked from the plant	27	2600	140			1.08	0.67	0.06	0.01	1.74	1.14	2.07	1.67	0.63	0.48
511	Zotz (2004)	83	Panama	Barro Colorado Island			9.2	-79.9	A	Moist tropical lowland forest	Caularthron bilamellatum	Orchidaceae	Forb	Picked from the plant	27	2600	140			1.27	0.78	0.06	0.01	2.91	1.69	1.52	0.71	0.32	0.21
512	Zotz (2004)	83	Panama	Barro Colorado Island			9.2	-79.9	A	Moist tropical lowland forest	Dimerandra emarginata	Orchidaceae	Forb	Picked from the plant	27	2600	140			0.94	0.43	0.09	0.03	1.83	0.68	1.95	1.85	0.19	0.17
513	Zotz (2004)	83	Panama	Barro Colorado Island			9.2	-79.9	A	Moist tropical lowland forest	Encyclia chimborazoensis	Orchidaceae	Forb	Picked from the plant	27	2600	140			1.34	0.71	0.06	0.02	1	0.17	1.02	1.19	0.23	0.27
514	Zotz (2004)	83	Panama	Barro Colorado Island			9.2	-79.9	A	Moist tropical lowland forest	Epidendrum imatophyllum	Orchidaceae	Forb	Picked from the plant	27	2600	140			1.55	0.85	0.21	0.06	3.37	1.92	2.33	0.81	0.64	0.44
515	Zotz (2004)	83	Panama	Barro Colorado Island			9.2	-79.9	A	Moist tropical lowland forest	Epidendrum nocturnum	Orchidaceae	Forb	Picked from the plant	27	2600	140			1.14	0.68	0.05	0.01	0.23	0.07	2.24	1.97	0.65	0.59
516	Zotz (2004)	83	Panama	Barro Colorado Island			9.2	-79.9	A	Moist tropical lowland forest	Epidendrum rigidum	Orchidaceae	Forb	Picked from the plant	27	2600	140			1.13	0.68	0.05	0.01	0.26	0.18	2.64	1.55	0.94	0.88
517	Zotz (2004)	83	Panama	Barro Colorado Island			9.2	-79.9	A	Moist tropical lowland forest	Gongora quinquenervis	Orchidaceae	Forb	Picked from the plant	27	2600	140			2.58	1.34	0.31	0.08	3.44	0.77	1.3	3.43	0.61	0.79
518	Zotz (2004)	83	Panama	Barro Colorado Island			9.2	-79.9	A	Moist tropical lowland forest	Maxillaria friedrichsthalii	Orchidaceae	Forb	Picked from the plant	27	2600	140			0.98	0.65	0.05	0.02	0.74	0.61	1.08	0.98	0.25	0.26
519	Zotz (2004)	83	Panama	Barro Colorado Island			9.2	-79.9	A	Moist tropical lowland forest	Oncidium ampliatum	Orchidaceae	Forb	Picked from the plant	27	2600	140			1.14	1.09	0.09	0.05	0.34	0.28	2.88	1.17	0.86	1.02
520	Zotz (2004)	83	Panama	Barro Colorado Island			9.2	-79.9	A	Moist tropical lowland forest	Polystachia foliosa	Orchidaceae	Forb	Picked from the plant	27	2600	140			2.08	1.05	0.1	0.04	2.09	1.39	2.07	2.71	0.52	0.52
521	Zotz (2004)	83	Panama	Barro Colorado Island			9.2	-79.9	A	Moist tropical lowland forest	Sobralia suaveolens	Orchidaceae	Forb	Picked from the plant	27	2600	140			1.34	1.16	0.08	0.05	1.17	1.07	1.45	0.84	0.13	0.16
522	Zotz (2004)	83	Panama	Barro Colorado Island			9.2	-79.9	A	Moist tropical lowland forest	Trigonidium egertonianum	Orchidaceae	Forb	Picked from the plant	27	2600	140			1.24	0.73	0.09	0.02	0.83	0.13	0.55	1.01	0.17	0.3
523	Zotz (2004)	83	Panama	Barro Colorado Island			9.2	-79.9	A	Moist tropical lowland forest	Peperomia macrostachya	Piperaceae	Forb	Picked from the plant	27	2600	140			1.12	0.87	0.23	0.06	4.3	3.96	3.01	4.03	0.54	0.91
524	Zotz (2004)	83	Panama	Barro Colorado Island			9.2	-79.9	A	Moist tropical lowland forest	Cecropia peltata	Urticaceae	Tree (evergreen)	Picked from the plant or recently fallen	27	2600	140			1.94	1.35
525	Zotz (2004)	83	Panama	Barro Colorado Island			9.2	-79.9	A	Moist tropical lowland forest	Ficus benjamina	Moraceae	Tree (evergreen)	Picked from the plant or recently fallen	27	2600	140			1.34	0.92
348	Kazakou et al. (2007)	84	France	Montpellier	CEFE, CNRS		44	3.9	C		Arenaria serpyllifolia	Caryophyllaceae	Forb	Picked from the plant or recently fallen	14.5	659	60			1	0.42	0.42	0.2							44.1						54.4
349	Kazakou et al. (2007)	84	France	Montpellier	CEFE, CNRS		44	3.9	C		Bituminosa bituminosa	N-fixer Fabaceae	Forb	Picked from the plant or recently fallen	14.5	659	60			2.13	0.74	0.29	0.06							78.5						25.4
350	Kazakou et al. (2007)	84	France	Montpellier	CEFE, CNRS		44	3.9	C		Brachypodium phoenicoides	Poaceae	Graminoid	Picked from the plant or recently fallen	14.5	659	60			2.6	0.73	0.21	0.09							74.1						38.5
351	Kazakou et al. (2007)	84	France	Montpellier	CEFE, CNRS		44	3.9	C		Bromus erectus	Poaceae	Graminoid	Picked from the plant or recently fallen	14.5	659	60			2.42	0.46	0.28	0.1							53.3						35.3
352	Kazakou et al. (2007)	84	France	Montpellier	CEFE, CNRS		44	3.9	C		Bromus madritensis	Poaceae	Graminoid	Picked from the plant or recently fallen	14.5	659	60			1.93	0.81	0.28	0.2							30						23.6
353	Kazakou et al. (2007)	84	France	Montpellier	CEFE, CNRS		44	3.9	C		Calamintha nepeta	Lamiaceae	Forb	Picked from the plant or recently fallen	14.5	659	60			2.01	1.03	0.3	0.2							58.2						42.5
354	Kazakou et al. (2007)	84	France	Montpellier	CEFE, CNRS		44	3.9	C		Crepis foetida	Asteraceae	Forb	Picked from the plant or recently fallen	14.5	659	60			2.08	0.91	0.33	0.16							53.2						34.9
355	Kazakou et al. (2007)	84	France	Montpellier	CEFE, CNRS		44	3.9	C		Dactylis glomerata	Poaceae	Graminoid	Picked from the plant or recently fallen	14.5	659	60			2.77	0.67	0.48	0.38							44.3						34
356	Kazakou et al. (2007)	84	France	Montpellier	CEFE, CNRS		44	3.9	C		Daucus carota	Apiaceae	Forb	Picked from the plant or recently fallen	14.5	659	60			2.33	0.59	0.3	0.14							59.4						47.7
357	Kazakou et al. (2007)	84	France	Montpellier	CEFE, CNRS		44	3.9	C		Geranium rotundifolium	Geraniaceae	Forb	Picked from the plant or recently fallen	14.5	659	60			2.18	1.55	0.32	0.32							28.1						31.5
358	Kazakou et al. (2007)	84	France	Montpellier	CEFE, CNRS		44	3.9	C		Inula conyza	Asteraceae	Forb	Picked from the plant or recently fallen	14.5	659	60			1.6	0.84	0.22	0.17							73.2						34.5
359	Kazakou et al. (2007)	84	France	Montpellier	CEFE, CNRS		44	3.9	C		Medicago minima	N-fixer Fabaceae	Forb	Picked from the plant or recently fallen	14.5	659	60			3.8	1.46	0.22	0.09							48						51.8
360	Kazakou et al. (2007)	84	France	Montpellier	CEFE, CNRS		44	3.9	C		Picris hieracioides	Asteraceae	Forb	Picked from the plant or recently fallen	14.5	659	60			2.62	0.56	0.42	0.27							44.7						42.9
361	Kazakou et al. (2007)	84	France	Montpellier	CEFE, CNRS		44	3.9	C		Rubia peregrina	Rubiaceae	Forb	Picked from the plant or recently fallen	14.5	659	60			1.92	0.6	0.19	0.06							72						39.1
362	Kazakou et al. (2007)	84	France	Montpellier	CEFE, CNRS		44	3.9	C		Teucrium chamaedrys	Lamiaceae	Forb	Picked from the plant or recently fallen	14.5	659	60			1.96	1.28	0.19	0.08							97.2						44.2
363	Kazakou et al. (2007)	84	France	Montpellier	CEFE, CNRS		44	3.9	C		Tordylium maximum	Apiaceae	Forb	Picked from the plant or recently fallen	14.5	659	60			2.1	1.02	0.57	0.35							45.4						33
364	Kazakou et al. (2007)	84	France	Montpellier	CEFE, CNRS		44	3.9	C		Trifolium angustifolium	N-fixer Fabaceae	Forb	Picked from the plant or recently fallen	14.5	659	60			3.98	2.23	0.26	0.09							41.7						29.6
365	Kazakou et al. (2007)	84	France	Montpellier	CEFE, CNRS		44	3.9	C		Veronica persica	Scrophulariaceae	Forb	Picked from the plant or recently fallen	14.5	659	60			2.19	1.72	0.28	0.3							40.9						34.7
798	Killingbeck & Whitford (1996)	85	USA	NV	Great Basin		38.9	-114.2	B	Perennial desert shrubs	Artemisia tridentata	Asteraceae	Tree (evergreen)	Litterfall	20	250	1700			1.3	0.6
799	Killingbeck & Whitford (1996)	85	USA	NV	Mojave		36	-115	B	Perennial desert shrubs	Atriplex confertifolia	Chenopodiaceae	Tree (evergreen)	Litterfall	20	140	1400			1.8	1.1
800	Killingbeck & Whitford (1996)	85	USA	NM	Chihuahuan		32.5	-106.8	B	Perennial desert shrubs	Brickellia laciniata	Asteraceae	Tree (deciduous)	Litterfall	14.4	272	1200			2.3	0.6
801	Killingbeck & Whitford (1996)	85	USA	NM	Chihuahuan		32.5	-106.8	B	Perennial desert shrubs	Brickellia laciniata	Asteraceae	Tree (deciduous)	Litterfall	14.4	272	1200			2.3	1.2
802	Killingbeck & Whitford (1996)	85	USA	NM	Chihuahuan		32.5	-106.8	B	Perennial desert shrubs	Brickellia laciniata	Asteraceae	Tree (deciduous)	Litterfall	14.4	272	1200			1.9	0.4
803	Killingbeck & Whitford (1996)	85	USA	NM	Chihuahuan		32.5	-106.8	B	Perennial desert shrubs	Chilopsis linearis	Bignoniaceae	Tree (deciduous)	Litterfall	14.4	272	1200			2.1	0.7
804	Killingbeck & Whitford (1996)	85	USA	NM	Chihuahuan		32.5	-106.8	B	Perennial desert shrubs	Chilopsis linearis	Bignoniaceae	Tree (deciduous)	Litterfall	14.4	272	1200			1.8	1
805	Killingbeck & Whitford (1996)	85	USA	NM	Chihuahuan		32.5	-106.8	B	Perennial desert shrubs	Chilopsis linearis	Bignoniaceae	Tree (deciduous)	Litterfall	14.4	272	1200			2	0.8
806	Killingbeck & Whitford (1996)	85	USA	NM	Chihuahuan		32.5	-106.8	B	Perennial desert shrubs	Fallugia paradoxa	Rosaceae	Tree (evergreen)	Litterfall	14.4	272	1200			1.7	1
807	Killingbeck & Whitford (1996)	85	USA	NM	Chihuahuan		32.5	-106.8	B	Perennial desert shrubs	Flourensia cernua	Asteraceae	Tree (deciduous)	Litterfall	14.4	272	1200			2.7	1.1
808	Killingbeck & Whitford (1996)	85	USA	NM	Chihuahuan		32.5	-106.8	B	Perennial desert shrubs	Fouquieria splendens	Fouquieriaceae	Tree (deciduous)	Litterfall	14.4	272	1200			1.6	1.2
809	Killingbeck & Whitford (1996)	85	USA	NM	Chihuahuan		32.5	-106.8	B	Perennial desert shrubs	Fouquieria splendens	Fouquieriaceae	Tree (deciduous)	Litterfall	14.4	272	1200			1.1	0.5
810	Killingbeck & Whitford (1996)	85	USA	NM	Chihuahuan		32.5	-106.8	B	Perennial desert shrubs	Fouquieria splendens	Fouquieriaceae	Tree (deciduous)	Litterfall	14.4	272	1200			2.1	0.6
811	Killingbeck & Whitford (1996)	85	USA	NV	Mojave		36	-115	B	Perennial desert shrubs	Grayia spinosa		Tree (deciduous)	Litterfall	20	140	1400			1.7	1.5
812	Killingbeck & Whitford (1996)	85	USA	NM	Chihuahuan		32.5	-106.8	B	Perennial desert shrubs	Larrea tridentata	Zygophyllaceae	Tree (evergreen)	Litterfall	14.4	272	1200			1.5	0.7
813	Killingbeck & Whitford (1996)	85	USA	NM	Chihuahuan		32.5	-106.8	B	Perennial desert shrubs	Larrea tridentata	Zygophyllaceae	Tree (evergreen)	Litterfall	14.4	272	1200			1.9	0.9
814	Killingbeck & Whitford (1996)	85	USA	NM	Chihuahuan		32.5	-106.8	B	Perennial desert shrubs	Prosopis glandulosa	N-fixer Fabaceae	Tree (deciduous)	Litterfall	14.4	272	1200			3.5	2.6
815	Killingbeck & Whitford (1996)	85	USA	NM	Chihuahuan		32.5	-106.8	B	Perennial desert shrubs	Rhus microphylla	Anacardiaceae	Tree (deciduous)	Litterfall	14.4	272	1200			2.3	1.1
816	Killingbeck & Whitford (1996)	85	USA	NM	Chihuahuan		32.5	-106.8	B	Perennial desert shrubs	Rhus microphylla	Anacardiaceae	Tree (deciduous)	Litterfall	14.4	272	1200			2.8	1.6
817	Killingbeck & Whitford (1996)	85	USA	NM	Chihuahuan		32.5	-106.8	B	Perennial desert shrubs	Rhus microphylla	Anacardiaceae	Tree (deciduous)	Litterfall	14.4	272	1200			2.6	1.4
